# Supplementary material for: Synthesis and structure of oxetane containing tripeptide motifs
Source: Royal Society of Chemistry journal article supplement (doi:10.1039/c4cc03507k), 2014-06-17
Supplement: c4cc03507k1.pdf [file c4cc03507k1.pdf]

# Synthesis and Structure of Oxetane Containing Tripeptide Motifs

Nicola H. Powell,<sup>a</sup> Guy J. Clarkson,<sup>a</sup> Rebecca Notman,<sup>a</sup> Piotr Raubo,<sup>b</sup> Nathaniel G.  
Martin,<sup>b</sup> and Michael Shipman<sup>\*a</sup>

<sup>a</sup> *Department of Chemistry, University of Warwick, Gibbet Hill Road, Coventry, CV4 7AL, UK. Fax: +44 2476 524112; Tel: +44 2476 523186; E-mail: [m.shipman@warwick.ac.uk](mailto:m.shipman@warwick.ac.uk)*

<sup>b</sup> *AstraZeneca, Mereside, Alderley Park, Macclesfield, SK10 4TG, UK. Fax: +44 121 414 4403.*

## Electronic Supplementary Information

|                                                                                                    |       |
|----------------------------------------------------------------------------------------------------|-------|
| Synthetic methods and characterisation data for <b>1a – f</b> , <b>4a – k</b> , and <b>7</b> ..... | 2-18  |
| <sup>1</sup> H and <sup>13</sup> C NMR of <b>1a – f</b> , <b>4a – k</b> , and <b>7</b> .....       | 19-37 |
| Chiral HPLC analysis of <b>4a</b> .....                                                            | 38-39 |
| X-ray structures of <b>1c</b> and <b>1e</b> .....                                                  | 40-41 |
| Molecular Dynamics Simulations for <b>1e</b> and <b>8</b> .....                                    | 42-50 |
| References.....                                                                                    | 51    |

### Methyl [3-(nitromethyl)oxetan-3-yl]-D-valinate, (R)-4a

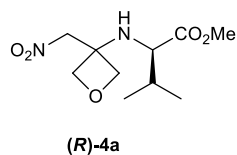

3-Oxetanone (130  $\mu$ L, 2.03 mmol), nitromethane (154  $\mu$ L, 2.85 mmol), and  $\text{NEt}_3$  (57  $\mu$ L, 0.41 mmol) were stirred at rt for 30 min then diluted with  $\text{CH}_2\text{Cl}_2$  (10 mL) and cooled to  $-78^\circ\text{C}$ . To this solution was added  $\text{NEt}_3$  (565  $\mu$ L, 4.05 mmol), followed by  $\text{MsCl}$  (157  $\mu$ L, 2.03 mmol) dropwise over 10 min. The reaction mixture was stirred at  $-78^\circ\text{C}$  for 40 min. Meanwhile, to a stirred solution of D-valine methyl ester hydrochloride (682 mg, 4.07 mmol) in  $\text{CH}_2\text{Cl}_2$  (12.5 mL) was added  $\text{NEt}_3$  (565  $\mu$ L, 4.05 mmol). This mixture was stirred at rt for 10 min then added to the oxetane solution at  $-78^\circ\text{C}$ . The reaction mixture was allowed to warm to rt, stirred for 20 h, then quenched with sat.  $\text{NH}_4\text{Cl}$  (15 mL). The mixture was extracted with  $\text{CH}_2\text{Cl}_2$  (5 x 30 mL) and the combined organics dried over  $\text{MgSO}_4$ , filtered and concentrated *in vacuo*. Purification by column chromatography (15  $\rightarrow$  25% EtOAc in hexane) provided (R)-4a (337 mg, 68%) as a yellow oil.  $R_f = 0.23$  (40% EtOAc in hexane);  $[\alpha]_D^{25} +16.6$  ( $c$  0.22,  $\text{CHCl}_3$ ); IR (thin film) 3330, 2960, 2877, 1729, 1555, 1466, 1434, 1379, 1275, 1201  $\text{cm}^{-1}$ ;  $\delta_{\text{H}}$  (400 MHz,  $\text{CDCl}_3$ ) 4.85 (1H, dd,  $J = 13.1, 0.8$  Hz, CHH), 4.76 (1H, d,  $J = 13.1$  Hz, CHH), 4.60 (1H, d,  $J = 7.3$  Hz, CHH), 4.59 (1H, d,  $J = 7.3$  Hz, CHH), 4.49 (1H, d,  $J = 7.3$  Hz, CHH), 4.45 (1H, d,  $J = 7.3$  Hz, CHH), 3.71 (3H, s,  $\text{CH}_3$ ), 3.21 (1H, dd,  $J = 8.5, 6.5$  Hz, CH), 2.27 (1H, d,  $J = 8.5$  Hz, NH), 1.97 – 1.85 (1H, m, CH), 0.91 (3H, d,  $J = 6.8$  Hz,  $\text{CH}_3$ ), 0.88 (3H, d,  $J = 6.8$  Hz,  $\text{CH}_3$ );  $\delta_{\text{C}}$  (100 MHz,  $\text{CDCl}_3$ ) 175.9 (C=O), 79.0 ( $\text{CH}_2$ ), 78.7 ( $\text{CH}_2$ ), 78.5 ( $\text{CH}_2$ ), 61.3 (CH), 59.5 (C), 52.3 ( $\text{CH}_3$ ), 32.1 (CH), 19.4 ( $\text{CH}_3$ ), 18.1 ( $\text{CH}_3$ ); MS ( $\text{ES}^+$ )  $m/z$  247  $[\text{M}+\text{H}]^+$ , 269  $[\text{M}+\text{Na}]^+$ ; HRMS ( $\text{ES}^+$ ) calcd. for  $\text{C}_{10}\text{H}_{18}\text{N}_2\text{NaO}_5$   $[\text{M}+\text{Na}]^+$ : 269.1108; found: 269.1101.

### Methyl [3-(nitromethyl)oxetan-3-yl]-L-valinate, (S)-4a

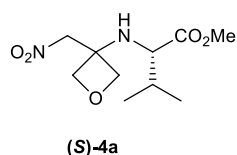

3-Oxetanone (130  $\mu$ L, 2.03 mmol), nitromethane (154  $\mu$ L, 2.85 mmol),  $\text{NEt}_3$  (57  $\mu$ L, 0.41 mmol) were stirred at rt for 30 min then diluted with  $\text{CH}_2\text{Cl}_2$  (10 mL) and cooled to  $-78^\circ\text{C}$ . To this solution was added  $\text{NEt}_3$  (565  $\mu$ L, 4.05 mmol), followed by  $\text{MsCl}$  (157  $\mu$ L, 2.03 mmol) dropwise over 10 min. The reaction mixture was stirred at  $-78^\circ\text{C}$  for 40 min. Meanwhile, to a stirred solution of L-valine methyl ester hydrochloride (681 mg, 4.06 mmol) in  $\text{CH}_2\text{Cl}_2$  (12.5 mL) was added  $\text{NEt}_3$  (565  $\mu$ L, 4.05 mmol). This mixture was stirred at rt for 10 min then added to the oxetane solution at  $-78^\circ\text{C}$ . The reaction mixture was allowed to warm to rt, stirred for 20 h, then quenched with sat.  $\text{NH}_4\text{Cl}$  (15 mL). The mixture was extracted with  $\text{CH}_2\text{Cl}_2$  (5 x

30 mL) and the combined organics dried over MgSO<sub>4</sub>, filtered and concentrated *in vacuo*. Purification by column chromatography (15 → 25% EtOAc in hexane) provided (*S*)-**4a** (323 mg, 65%) as a yellow oil.  $R_f = 0.19$  (100% CH<sub>2</sub>Cl<sub>2</sub>);  $[\alpha]_D^{33} -19.4$  (*c* 0.24, CHCl<sub>3</sub>); IR (thin film) 3333, 2962, 2878, 1730, 1555, 1467, 1435, 1379, 1276, 1202 cm<sup>-1</sup>;  $\delta_H$  (400 MHz, CDCl<sub>3</sub>) 4.85 (1H, d, *J* = 13.1 Hz, CHH), 4.77 (1H, d, *J* = 13.1 Hz, CHH), 4.60 (2H, d, *J* = 7.0 Hz, CHH), 4.50 (1H, d, *J* = 7.0 Hz, CHH), 4.46 (1H, d, *J* = 7.0 Hz, CHH), 3.72 (3H, s, CH<sub>3</sub>), 3.22 (1H, dd, *J* = 10.8, 6.0 Hz, CH), 2.27 (1H, d, *J* = 10.8 Hz, NH), 1.98 – 1.85 (1H, m, CH), 0.92 (3H, d, *J* = 6.8 Hz, CH<sub>3</sub>), 0.89 (3H, d, *J* = 6.8 Hz, CH<sub>3</sub>);  $\delta_C$  (100 MHz, CDCl<sub>3</sub>) 175.9 (C=O), 79.0 (CH<sub>2</sub>), 78.7 (CH<sub>2</sub>), 78.6 (CH<sub>2</sub>), 61.4 (CH), 59.5 (C), 52.3 (CH<sub>3</sub>), 32.2 (CH), 19.4 (CH<sub>3</sub>), 18.1 (CH<sub>3</sub>); MS (ES<sup>+</sup>) *m/z* 269 [M+Na]<sup>+</sup>; HRMS (ES<sup>+</sup>) calcd. for C<sub>10</sub>H<sub>18</sub>N<sub>2</sub>NaO<sub>5</sub> [M+Na]<sup>+</sup>: 269.1108; found: 269.1105.

#### Benzyl [3-(nitromethyl)oxetan-3-yl]-L-valinate, **4b**

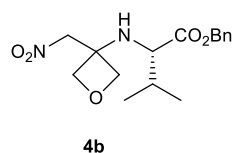

Nitromethane (177  $\mu$ L, 3.27 mmol), 3-oxetanone (273  $\mu$ L, 4.26 mmol) and NEt<sub>3</sub> (91  $\mu$ L, 0.65 mmol) were stirred at rt for 30 min then diluted with CH<sub>2</sub>Cl<sub>2</sub> (16 mL) and cooled to –78 °C. To this solution was added NEt<sub>3</sub> (0.91 mL, 6.53 mmol), followed by MsCl (255  $\mu$ L, 3.29 mmol) dropwise over 10 min. This mixture was stirred at –78 °C for 40 min. Meanwhile, to a stirred solution of L-valine benzyl ester *p*-toluenesulfonate salt (2.49 g, 6.56 mmol) in CH<sub>2</sub>Cl<sub>2</sub> (19 mL) was added NEt<sub>3</sub> (0.91 mL, 6.53 mmol). The reaction mixture was stirred at rt for 10 min before it was added to the oxetane solution at –78 °C. The reaction mixture was allowed to warm to rt and stirred for 21 h before being quenched with sat. NH<sub>4</sub>Cl (30 mL). The mixture was extracted with CH<sub>2</sub>Cl<sub>2</sub> (2 x 40 mL) and EtOAc (2 x 40 mL). The combined organics were dried over Na<sub>2</sub>SO<sub>4</sub>, filtered and concentrated *in vacuo*. Purification by column chromatography (15 → 40% EtOAc in heptane) provided **4b** (876 mg, 83%) as a pale pink oil.  $R_f = 0.33$  (30% EtOAc in heptane);  $[\alpha]_D^{17} -4.5$  (*c* 0.20, CHCl<sub>3</sub>); IR (KBr) 3338, 2963, 2877, 1732, 1560, 1498, 1457, 1379, 1268, 1184, 983, 738 cm<sup>-1</sup>;  $\delta_H$  (400 MHz, CDCl<sub>3</sub>) 7.40 – 7.31 (5H, m, ArH), 5.17 (1H, d, *J* = 12.0 Hz, CHH), 5.11 (1H, d, *J* = 12.0 Hz, CHH), 4.80 (1H, dd, *J* = 13.1, 0.9 Hz, CHH), 4.72 (1H, dd, *J* = 13.1, 0.9 Hz, CHH), 4.55 (1H, d, *J* = 7.1 Hz, CHH), 4.53 (1H, d, *J* = 7.1 Hz, CHH), 4.45 (1H, d, *J* = 7.1 Hz, CHH), 4.35 (1H, d, *J* = 7.1 Hz, CHH), 3.25 (1H, dd, *J* = 10.9, 5.9 Hz, CH), 2.29 (1H, d, *J* = 10.9 Hz, NH), 2.00 – 1.88 (1H, m, CH), 0.91 (3H, d, *J* = 6.8 Hz, CH<sub>3</sub>), 0.86 (3H, d, *J* = 6.8 Hz, CH<sub>3</sub>);  $\delta_C$  (175 MHz, CDCl<sub>3</sub>) 175.3 (C=O), 135.4 (C), 128.9 (CH), 128.8 (CH), 128.8 (CH), 78.9 (CH<sub>2</sub>), 78.7

(CH<sub>2</sub>), 78.7 (CH<sub>2</sub>), 67.3 (CH<sub>2</sub>), 61.5 (CH), 59.6 (C), 32.2 (CH), 19.4 (CH<sub>3</sub>), 18.0 (CH<sub>3</sub>); MS (ES<sup>+</sup>) *m/z* 323 [M+H]<sup>+</sup>; HRMS (ES<sup>+</sup>) calcd. for C<sub>16</sub>H<sub>23</sub>N<sub>2</sub>O<sub>5</sub> [M+H]<sup>+</sup>: 323.1602; found: 323.1606.

### Benzyl [3-(1-nitro-2-phenylethyl)oxetan-3-yl]glycinate, **4c**

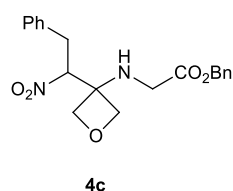

(2-Nitroethyl)benzene (196 mg, 1.30 mmol), 3-oxetanone (108  $\mu$ L, 1.68 mmol), and NEt<sub>3</sub> (36  $\mu$ L, 0.26 mmol) were stirred at rt for 90 min then diluted with CH<sub>2</sub>Cl<sub>2</sub> (6.4 mL) and cooled to –78 °C. To this mixture was added NEt<sub>3</sub> (358  $\mu$ L, 2.57 mmol), followed by MsCl (100  $\mu$ L, 1.29 mmol) dropwise. The reaction mixture was stirred at –78 °C for 90 min. Meanwhile, to glycine benzyl ester *p*-toluenesulfonate salt (965 mg, 2.86 mmol) in CH<sub>2</sub>Cl<sub>2</sub> (9 mL) was added NEt<sub>3</sub> (360  $\mu$ L, 2.58 mmol). This mixture was stirred at rt for 10 min before being added to the oxetane solution at –78 °C. The combined mixture was allowed to warm to rt overnight before being quenched with sat. NH<sub>4</sub>Cl (15 mL). The mixture was extracted with CH<sub>2</sub>Cl<sub>2</sub> (2 x 50 mL) and EtOAc (2 x 50 mL), and the combined organics dried over MgSO<sub>4</sub>, filtered and concentrated *in vacuo*. Purification by repeat column chromatography (35 → 100% EtOAc in hexane; 20 → 30% EtOAc in hexane) provided **4c** (280 mg, 58%) as a pale yellow solid. M.p. 53 – 54 °C; R<sub>f</sub> = 0.34 (40% EtOAc in hexane); IR (thin film) 3342, 2958, 2883, 1736, 1604, 1551, 1496, 1455, 1367, 1189, 1083, 981, 737 cm<sup>–1</sup>;  $\delta$ <sub>H</sub> (400 MHz, CDCl<sub>3</sub>) 7.39 – 7.19 (10H, m, ArH), 5.20 (2H, s, CH<sub>2</sub>), 5.11 (1H, dd, *J* = 9.9, 4.4 Hz, CH), 4.61 (1H, d, *J* = 7.5 Hz, CHH), 4.59 (1H, d, *J* = 7.5 Hz, CHH), 4.47 (2H, s, CH<sub>2</sub>), 3.75 (1H, d, *J* = 17.6 Hz, CHH), 3.65 (1H, d, *J* = 17.6 Hz, CHH), 3.51 (1H, dd, *J* = 14.7, 9.9 Hz, CHH), 3.27 (1H, dd, *J* = 14.7, 4.4 Hz, CHH), 2.50 (1H, br s, NH);  $\delta$ <sub>C</sub> (100 MHz, acetone-*d*<sub>6</sub>) 172.6 (C=O), 137.2 (C), 137.1 (C), 129.9 (CH), 129.5 (CH), 129.3 (CH), 129.1 (CH), 129.0 (CH), 128.0 (CH), 92.8 (CH), 77.5 (CH<sub>2</sub>), 77.1 (CH<sub>2</sub>), 67.1 (CH<sub>2</sub>), 63.1 (C), 45.2 (CH<sub>2</sub>), 35.1 (CH<sub>2</sub>); MS (ES<sup>+</sup>) *m/z* 371 [M+H]<sup>+</sup>, 393 [M+Na]<sup>+</sup>; HRMS (ES<sup>+</sup>) calcd. for C<sub>20</sub>H<sub>23</sub>N<sub>2</sub>O<sub>5</sub> [M+H]<sup>+</sup>: 371.1601; found: 371.1602.

### Benzyl [3-(nitromethyl)oxetan-3-yl]glycinate, **4d**

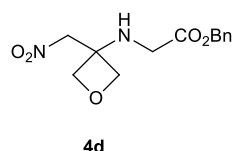

Nitromethane (220  $\mu$ L, 4.06 mmol), 3-oxetanone (340  $\mu$ L, 5.30 mmol) and NEt<sub>3</sub> (113  $\mu$ L, 0.81 mmol) were stirred at rt for 30 min then diluted with CH<sub>2</sub>Cl<sub>2</sub> (20 mL) and cooled to –78 °C. To this solution was added

NEt<sub>3</sub> (1.13 mL, 8.11 mmol), followed by MsCl (315  $\mu$ L, 4.07 mmol) dropwise over 10 min. This mixture was stirred at  $-78$  °C for 40 min. Meanwhile, to a stirred solution of glycine benzyl ester *p*-toluenesulfonate salt (2.75 g, 8.15 mmol) in CH<sub>2</sub>Cl<sub>2</sub> (25 mL) was added NEt<sub>3</sub> (1.13 mL, 8.11 mmol). The reaction mixture was stirred at rt for 10 min before it was added to the oxetane solution at  $-78$  °C. The reaction mixture was allowed to warm to rt and stirred for 21 h before being quenched with sat. NH<sub>4</sub>Cl (30 mL). The mixture was extracted with CH<sub>2</sub>Cl<sub>2</sub> (4 x 75 mL). The combined organics were dried over MgSO<sub>4</sub>, filtered and concentrated *in vacuo*. Purification by column chromatography (60  $\rightarrow$  80% Et<sub>2</sub>O in hexane) gave a yellow solid. Recrystallisation (EtOH/hexane) provided **4d** (728 mg, 64%) as off-white crystals. M.p. 77 – 79 °C (EtOH); R<sub>f</sub> = 0.30 (50% EtOAc in petroleum ether); IR (thin film) 3342, 2962, 2885, 1736, 1550, 1498, 1456, 1436, 1380, 1190, 1102, 976, 737, 696 cm<sup>-1</sup>;  $\delta_{\text{H}}$  (400 MHz, CDCl<sub>3</sub>) 7.41 – 7.32 (5H, m, ArH), 5.18 (2H, s, CH<sub>2</sub>), 4.82 (2H, s, CH<sub>2</sub>), 4.61 (2H, d, *J* = 7.3 Hz, CHH), 4.56 (2H, d, *J* = 7.3 Hz, CHH), 3.58 (2H, d, *J* = 5.3 Hz, CH<sub>2</sub>), 2.39 (1H, br t, *J* = 5.3 Hz, NH);  $\delta_{\text{C}}$  (100 MHz, CDCl<sub>3</sub>) 171.7 (C=O), 135.2 (C), 128.8 (CH), 128.7 (CH), 128.6 (CH), 78.5 (CH<sub>2</sub>), 78.3 (CH<sub>2</sub>), 67.3 (CH<sub>2</sub>), 59.5 (C), 44.9 (CH<sub>2</sub>); MS (ES<sup>+</sup>) *m/z* 281 [M+H]<sup>+</sup>, 303 [M+Na]<sup>+</sup>; HRMS (ES<sup>+</sup>) calcd. for C<sub>13</sub>H<sub>16</sub>N<sub>2</sub>NaO<sub>5</sub> [M+Na]<sup>+</sup>: 303.0951; found: 303.0957.

### Benzyl [3-(nitromethyl)oxetan-3-yl]-L-threoninate, **4e**

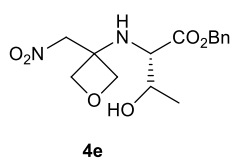

3-Oxetanone (260  $\mu$ L, 4.05 mmol), nitromethane (307  $\mu$ L, 5.67 mmol) and NEt<sub>3</sub> (113  $\mu$ L, 0.81 mmol) were stirred at rt for 30 min then diluted with CH<sub>2</sub>Cl<sub>2</sub> (20 mL) and cooled to  $-78$  °C. To this solution was added NEt<sub>3</sub> (1.13 mL, 8.11 mmol), followed by MsCl (314  $\mu$ L, 4.06 mmol) dropwise over 10 min. The reaction mixture was stirred at  $-78$  °C for 40 min. Meanwhile, to a stirred solution of L-threonine benzyl ester hydrochloride (1.99 g, 8.10 mmol) in CH<sub>2</sub>Cl<sub>2</sub> (25 mL) was added NEt<sub>3</sub> (1.13 mL, 8.11 mmol). This mixture was stirred at rt for 10 min then added to the oxetane solution at  $-78$  °C. The reaction mixture was allowed to warm to rt, stirred for 20 h, then quenched with sat. NH<sub>4</sub>Cl (30 mL). The mixture was extracted with CH<sub>2</sub>Cl<sub>2</sub> (5 x 50 mL) and the combined organics dried over MgSO<sub>4</sub>, filtered and concentrated *in vacuo*. Purification by repeat column chromatography (30  $\rightarrow$  50% EtOAc in hexane; 0  $\rightarrow$  2% MeOH in CH<sub>2</sub>Cl<sub>2</sub>; 70  $\rightarrow$  85% Et<sub>2</sub>O in hexane) provided **4e** (741 mg, 56%) as a pale yellow oil. R<sub>f</sub> = 0.22 (50% EtOAc in hexane);  $[\alpha]_{\text{D}}^{23}$   $-7.7$  (*c* 0.22, CHCl<sub>3</sub>); IR (thin film) 3347, 2925, 1729, 1552, 1499, 1457, 1378, 1265, 1173, 974, 736, 697 cm<sup>-1</sup>;  $\delta_{\text{H}}$  (400 MHz,

CDCl<sub>3</sub>) 7.41 – 7.33 (5H, m, ArH), 5.20 (1H, d, *J* = 12.1 Hz, CHH), 5.15 (1H, d, *J* = 12.1 Hz, CHH), 4.82 (1H, d, *J* = 13.3 Hz, CHH), 4.73 (1H, d, *J* = 13.3 Hz, CHH), 4.57 – 4.52 (2H, m, CHH), 4.45 (1H, d, *J* = 7.3 Hz, CHH), 4.43 (1H, d, *J* = 7.3 Hz, CHH), 3.84 – 3.76 (1H, m, CH), 3.27 (1H, dd, *J* = 10.6, 6.2 Hz, CH), 2.87 (1H, d, *J* = 3.5 Hz, OH), 2.70 (1H, d, *J* = 10.6 Hz, NH), 1.18 (3H, d, *J* = 6.3 Hz, CH<sub>3</sub>); δ<sub>C</sub> (100 MHz, CDCl<sub>3</sub>) 173.7 (C=O), 134.8 (C), 129.0 (CH), 128.9 (CH), 78.8 (CH<sub>2</sub>), 78.5 (CH<sub>2</sub>), 78.3 (CH<sub>2</sub>), 68.5 (CH), 67.8 (CH<sub>2</sub>), 62.1 (CH), 59.2 (C), 19.2 (CH<sub>3</sub>); MS (ES<sup>+</sup>) *m/z* 325 [M+H]<sup>+</sup>, 347 [M+Na]<sup>+</sup>; HRMS (ES<sup>+</sup>) calcd. for C<sub>15</sub>H<sub>20</sub>N<sub>2</sub>NaO<sub>6</sub> [M+Na]<sup>+</sup>: 347.1214; found: 347.1213.

### Benzyl [3-(nitromethyl)oxetan-3-yl]-L-leucinate, **4f**

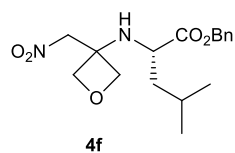

3-Oxetanone (260 μL, 4.05 mmol), nitromethane (307 μL, 5.67 mmol) and NEt<sub>3</sub> (113 μL, 0.81 mmol) were stirred at rt for 30 min then diluted with CH<sub>2</sub>Cl<sub>2</sub> (20 mL) and cooled to –78 °C. To this solution was added NEt<sub>3</sub> (1.13 mL, 8.11 mmol), followed by MsCl (314 μL, 4.06 mmol) dropwise over 10 min. The reaction mixture was stirred at –78 °C for 40 min. Meanwhile, to a stirred solution of L-leucine benzyl ester *p*-toluenesulfonate salt (3.19 g, 8.11 mmol) in CH<sub>2</sub>Cl<sub>2</sub> (25 mL) was added NEt<sub>3</sub> (1.13 mL, 8.11 mmol). This mixture was stirred at rt for 10 min then added to the oxetane solution at –78 °C. The reaction mixture was allowed to warm to rt, stirred for 20 h, then quenched with sat. NH<sub>4</sub>Cl (30 mL). The mixture was extracted with CH<sub>2</sub>Cl<sub>2</sub> (5 x 50 mL) and the combined organics dried over MgSO<sub>4</sub>, filtered and concentrated *in vacuo*. Purification by column chromatography (15 → 30% EtOAc in hexane) provided **4f** (798 mg, 59%) as a pale yellow oil. R<sub>f</sub> = 0.31 (30% EtOAc in hexane); [α]<sub>D</sub><sup>19</sup> +5.0 (*c* 0.16, CHCl<sub>3</sub>); IR (thin film) 3338, 2958, 2874, 1730, 1553, 1499, 1457, 1379, 1268, 1169, 976, 737, 697 cm<sup>-1</sup>; δ<sub>H</sub> (300 MHz, CDCl<sub>3</sub>) 7.42 – 7.31 (5H, m, ArH), 5.17 (1H, d, *J* = 12.1 Hz, CHH), 5.08 (1H, d, *J* = 12.1 Hz, CHH), 4.83 (1H, dd, *J* = 12.8, 0.8 Hz, CHH), 4.75 (1H, d, *J* = 12.8 Hz, CHH), 4.58 (1H, d, *J* = 7.2 Hz, CHH), 4.53 (1H, d, *J* = 7.0 Hz, CHH), 4.45 (1H, d, *J* = 7.2 Hz, CHH), 4.26 (1H, d, *J* = 7.0 Hz, CHH), 3.51 (1H, s, CH), 2.22 (1H, br s, NH), 1.74 – 1.57 (1H, m, CH), 1.55 – 1.35 (2H, m, CH<sub>2</sub>), 0.90 (3H, d, *J* = 6.8 Hz, CH<sub>3</sub>), 0.88 (3H, d, *J* = 6.8 Hz, CH<sub>3</sub>); δ<sub>C</sub> (75 MHz, CDCl<sub>3</sub>) 175.9 (C=O), 135.2 (C), 128.8 (CH), 128.8 (CH), 79.1 (CH<sub>2</sub>), 78.9 (CH<sub>2</sub>), 78.3 (CH<sub>2</sub>), 67.3 (CH<sub>2</sub>), 59.7 (C), 54.5 (CH), 43.5 (CH<sub>2</sub>), 24.7 (CH), 22.9 (CH<sub>3</sub>), 22.3 (CH<sub>3</sub>); MS (ES<sup>+</sup>) *m/z* 337 [M+H]<sup>+</sup>, 359 [M+Na]<sup>+</sup>; HRMS (ES<sup>+</sup>) calcd. for C<sub>17</sub>H<sub>24</sub>N<sub>2</sub>NaO<sub>5</sub> [M+Na]<sup>+</sup>: 359.1577; found: 359.1564.

### Benzyl [3-(nitromethyl)oxetan-3-yl]-L-isoleucinate, 4g

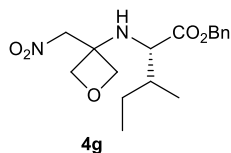

3-Oxetanone (260  $\mu$ L, 4.05 mmol), nitromethane (307  $\mu$ L, 5.67 mmol) and  $\text{NEt}_3$  (113  $\mu$ L, 0.81 mmol) were stirred at rt for 30 min then diluted with  $\text{CH}_2\text{Cl}_2$  (20 mL) and cooled to  $-78^\circ\text{C}$ . To this solution was added  $\text{NEt}_3$  (1.13 mL, 8.11 mmol), followed by  $\text{MsCl}$  (314  $\mu$ L, 4.06 mmol) dropwise over 10 min. The reaction mixture was stirred at  $-78^\circ\text{C}$  for 40 min. Meanwhile, to a stirred solution of L-isoleucine benzyl ester *p*-toluenesulfonate salt (3.19 g, 8.11 mmol) in  $\text{CH}_2\text{Cl}_2$  (25 mL) was added  $\text{NEt}_3$  (1.13 mL, 8.11 mmol). This mixture was stirred at rt for 10 min then added to the oxetane solution at  $-78^\circ\text{C}$ . The reaction mixture was allowed to warm to rt, stirred for 20 h, then quenched with sat.  $\text{NH}_4\text{Cl}$  (30 mL). The mixture was extracted with  $\text{CH}_2\text{Cl}_2$  (5 x 50 mL) and the combined organics dried over  $\text{MgSO}_4$ , filtered and concentrated *in vacuo*. Purification by column chromatography (10  $\rightarrow$  25% EtOAc in hexane) provided **4g** (704 mg, 52%) as a pale yellow oil.  $R_f = 0.23$  (30% EtOAc in hexane);  $[\alpha]_D^{23} -2.2$  (*c* 0.24,  $\text{CHCl}_3$ ); IR (thin film) 3339, 2965, 2879, 1728, 1555, 1499, 1457, 1379, 1177, 1147, 979, 751, 698  $\text{cm}^{-1}$ ;  $\delta_H$  (400 MHz,  $\text{CDCl}_3$ ) 7.41 – 7.32 (5H, m, ArH), 5.16 (1H, d,  $J = 12.1$  Hz, CHH), 5.12 (1H, d,  $J = 12.1$  Hz, CHH), 4.80 (1H, dd,  $J = 13.1, 0.8$  Hz, CHH), 4.72 (1H, d,  $J = 13.1$  Hz, CHH), 4.55 (1H, d,  $J = 7.3$  Hz, CHH), 4.54 (1H, d,  $J = 7.3$  Hz, CHH), 4.45 (1H, d,  $J = 7.3$  Hz, CHH), 4.33 (1H, d,  $J = 7.3$  Hz, CHH), 3.31 (1H, dd,  $J = 11.0, 6.2$  Hz, CH), 2.30 (1H, d,  $J = 11.0$  Hz, NH), 1.72 – 1.61 (1H, m, CH), 1.52 – 1.41 (1H, m, CHH), 1.13 – 1.01 (1H, m, CHH), 0.88 – 0.81 (6H, m,  $\text{CH}_3$ );  $\delta_C$  (100 MHz,  $\text{CDCl}_3$ ) 175.3 (C=O), 135.3 (C), 128.9 (CH), 128.8 (CH), 78.9 ( $\text{CH}_2$ ), 78.7 ( $\text{CH}_2$ ), 78.5 ( $\text{CH}_2$ ), 67.2 ( $\text{CH}_2$ ), 60.6 (CH), 59.6 (C), 39.0 (CH), 24.9 ( $\text{CH}_2$ ), 15.7 ( $\text{CH}_3$ ), 11.6 ( $\text{CH}_3$ ); MS ( $\text{ES}^+$ )  $m/z$  337  $[\text{M}+\text{H}]^+$ , 359  $[\text{M}+\text{Na}]^+$ ; HRMS ( $\text{ES}^+$ ) calcd. for  $\text{C}_{17}\text{H}_{24}\text{N}_2\text{NaO}_5$   $[\text{M}+\text{Na}]^+$ : 359.1577; found: 359.1576.

### Benzyl [3-(nitromethyl)oxetan-3-yl]-L-phenylalaninate, 4h

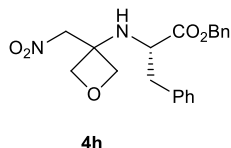

Nitromethane (220  $\mu$ L, 4.06 mmol), 3-oxetanone (339  $\mu$ L, 5.28 mmol) and  $\text{NEt}_3$  (113  $\mu$ L, 0.81 mmol) were stirred at rt for 30 min then diluted with  $\text{CH}_2\text{Cl}_2$  (20 mL) and cooled to  $-78^\circ\text{C}$ . To this solution was added  $\text{NEt}_3$  (1.13 mL, 8.11 mmol), followed by  $\text{MsCl}$  (317  $\mu$ L, 4.09 mmol) dropwise over 10 min. This mixture was stirred at  $-78^\circ\text{C}$  for 35 min. Meanwhile, to a stirred solution of L-phenylalanine benzyl ester hydrochloride (2.38 g, 8.16 mmol) in  $\text{CH}_2\text{Cl}_2$  (25 mL) was added  $\text{NEt}_3$  (1.13 mL, 8.11 mmol). The reaction mixture was stirred at rt for 10

min before it was added to the oxetane solution at  $-78\text{ }^{\circ}\text{C}$ . The reaction mixture was allowed to warm to rt and stirred for 22 h before being quenched with sat.  $\text{NH}_4\text{Cl}$  (30 mL). The mixture was extracted with  $\text{CH}_2\text{Cl}_2$  (1 x 30 mL) and EtOAc (3 x 40 mL). The combined organics were dried over  $\text{Na}_2\text{SO}_4$ , filtered and concentrated *in vacuo*. Purification by column chromatography (15  $\rightarrow$  40% EtOAc in heptane) gave a yellow solid. Recrystallisation (MeOH) provided **4h** (1.10 g, 73%) as pale yellow crystals. M.p.  $92 - 93\text{ }^{\circ}\text{C}$  (MeOH);  $R_f = 0.25$  (30% EtOAc in heptane);  $[\alpha]_{\text{D}}^{17} -9.6$  ( $c$  0.20,  $\text{CHCl}_3$ ); IR (KBr) 3335, 2957, 2880, 1732, 1603, 1556, 1497, 1455, 1379, 1275, 1175, 982, 749  $\text{cm}^{-1}$ ;  $\delta_{\text{H}}$  (400 MHz,  $\text{CDCl}_3$ ) 7.37 – 7.33 (3H, m, ArH), 7.28 – 7.21 (5H, m, ArH), 7.13 – 7.09 (2H, m, ArH), 5.11 (1H, d,  $J = 12.0$  Hz, CHH), 5.05 (1H, d,  $J = 12.0$  Hz, CHH), 4.75 (1H, dd,  $J = 13.1, 0.8$  Hz, CHH), 4.69 (1H, d,  $J = 13.1$  Hz, CHH), 4.47 (1H, d,  $J = 7.2$  Hz, CHH), 4.35 (1H, d,  $J = 7.3$  Hz, CHH), 4.33 (1H, d,  $J = 7.2$  Hz, CHH), 4.25 (1H, d,  $J = 7.3$  Hz, CHH), 3.77 – 3.70 (1H, m, CH), 2.97 (1H, dd,  $J = 13.4, 6.3$  Hz, CHH), 2.87 (1H, dd,  $J = 13.4, 7.1$  Hz, CHH), 2.37 (1H, d,  $J = 9.6$  Hz, NH);  $\delta_{\text{C}}$  (175 MHz,  $\text{CDCl}_3$ ) 174.5 (C=O), 136.6 (C), 135.2 (C), 129.6 (CH), 128.8 (CH), 128.8 (CH), 128.6 (CH), 127.2 (CH), 78.8 ( $\text{CH}_2$ ), 78.7 ( $\text{CH}_2$ ), 78.6 ( $\text{CH}_2$ ), 67.5 ( $\text{CH}_2$ ), 59.6 (C), 57.7 (CH), 40.8 ( $\text{CH}_2$ ); MS ( $\text{ES}^+$ )  $m/z$  371  $[\text{M}+\text{H}]^+$ ; HRMS ( $\text{ES}^+$ ) calcd. for  $\text{C}_{20}\text{H}_{23}\text{N}_2\text{O}_5$   $[\text{M}+\text{H}]^+$ : 371.1607; found: 371.1607.

### Methyl [3-(nitromethyl)oxetan-3-yl]-L-serinate, **4i**

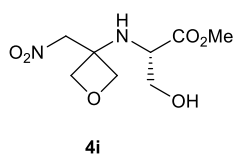

Nitromethane (70  $\mu\text{L}$ , 1.29 mmol), 3-oxetanone (107  $\mu\text{L}$ , 1.67 mmol) and  $\text{NEt}_3$  (36  $\mu\text{L}$ , 0.26 mmol) were stirred at rt for 30 min then diluted with  $\text{CH}_2\text{Cl}_2$  (6.3 mL) and cooled to  $-78\text{ }^{\circ}\text{C}$ . To this solution was added  $\text{NEt}_3$  (357  $\mu\text{L}$ , 2.56 mmol), followed by  $\text{MsCl}$  (99  $\mu\text{L}$ , 1.28 mmol) dropwise over 10 min. This mixture was stirred at  $-78\text{ }^{\circ}\text{C}$  for 30 min. Meanwhile, to a stirred solution of L-serine methyl ester hydrochloride (401 mg, 2.58 mmol) in  $\text{CH}_2\text{Cl}_2$  (10 mL) was added  $\text{NEt}_3$  (357  $\mu\text{L}$ , 2.56 mmol). The reaction mixture was stirred at rt for 10 min before it was added to the oxetane solution at  $-78\text{ }^{\circ}\text{C}$ . The reaction mixture was allowed to warm to rt and stirred for 25 h before being quenched with sat.  $\text{NH}_4\text{Cl}$  (15 mL). The mixture was extracted with  $\text{CH}_2\text{Cl}_2$  (2 x 30 mL) and EtOAc (2 x 30 mL). The combined organics were dried over  $\text{MgSO}_4$ , filtered and concentrated *in vacuo*. Purification by column chromatography (65  $\rightarrow$  70% EtOAc in hexane) provided **4i** (146 mg, 48%) as a colourless oil.  $R_f = 0.28$  (80% EtOAc in petroleum ether);  $[\alpha]_{\text{D}}^{30} -23.3$  ( $c$  0.20,  $\text{CHCl}_3$ ); IR (thin film) 3346, 2956, 2886, 1732, 1553, 1459, 1380, 1207, 1060  $\text{cm}^{-1}$ ;  $\delta_{\text{H}}$  (400 MHz,  $\text{CDCl}_3$ ) 4.85 (1H,



d,  $J = 13.2$  Hz, CHH), 4.80 (1H, d,  $J = 13.2$  Hz, CHH), 4.61 (2H, d,  $J = 7.3$  Hz, CHH), 4.53 (2H, d,  $J = 7.3$  Hz, CHH), 3.79 – 3.73 (4H, m, CH<sub>3</sub>, CHH), 3.65 – 3.59 (2H, m, CHH, CH), 2.70 (2H, br s, OH, NH);  $\delta_{\text{C}}$  (100 MHz, CDCl<sub>3</sub>) 173.6 (C=O), 78.9 (CH<sub>2</sub>), 78.7 (CH<sub>2</sub>), 78.5 (CH<sub>2</sub>), 63.9 (CH<sub>2</sub>), 59.3 (C), 57.5 (CH), 52.9 (CH<sub>3</sub>); MS (ES<sup>+</sup>)  $m/z$  257 [M+Na]<sup>+</sup>; HRMS (ES<sup>+</sup>) calcd. for C<sub>8</sub>H<sub>14</sub>N<sub>2</sub>NaO<sub>6</sub> [M+Na]<sup>+</sup>: 257.0744; found: 257.0746.

### Benzyl [[3-(nitromethyl)oxetan-3-yl]-L-valyl]glycinate, **4j**

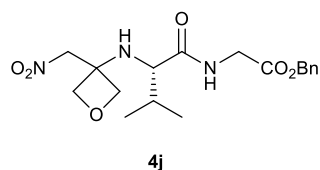

3-Oxetanone (260  $\mu$ L, 4.05 mmol), nitromethane (307  $\mu$ L, 5.67 mmol) and NEt<sub>3</sub> (113  $\mu$ L, 0.81 mmol) were stirred at rt for 30 min then diluted with CH<sub>2</sub>Cl<sub>2</sub> (20 mL) and cooled to  $-78$  °C. To this solution was added NEt<sub>3</sub> (1.13 mL, 8.11 mmol), followed by MsCl (314  $\mu$ L, 4.06 mmol) dropwise over 10 min. The reaction mixture was stirred at  $-78$  °C for 40 min. Meanwhile, to a stirred solution of L-valylglycine benzyl ester hydrochloride (2.44 g, 8.11 mmol) in CH<sub>2</sub>Cl<sub>2</sub> (25 mL) was added NEt<sub>3</sub> (1.13 mL, 8.11 mmol). This mixture was stirred at rt for 10 min then added to the oxetane solution at  $-78$  °C. The reaction mixture was allowed to warm to rt, stirred for 20 h, then quenched with sat. NH<sub>4</sub>Cl (30 mL). The mixture was extracted with CH<sub>2</sub>Cl<sub>2</sub> (5 x 50 mL) and the combined organics dried over MgSO<sub>4</sub>, filtered and concentrated *in vacuo*. Purification by repeat column chromatography (40  $\rightarrow$  50% EtOAc in hexane; 80  $\rightarrow$  100% Et<sub>2</sub>O in hexane; 0  $\rightarrow$  2% MeOH in CH<sub>2</sub>Cl<sub>2</sub>) provided **4j** (949 mg, 62%) as a pale yellow oil.  $R_f = 0.31$  (60% EtOAc in hexane);  $[\alpha]_{\text{D}}^{23} -17.1$  ( $c$  0.22, CHCl<sub>3</sub>); IR (thin film) 3321, 2962, 2878, 1746, 1652, 1552, 1499, 1457, 1380, 1278, 1187, 977, 738, 698 cm<sup>-1</sup>;  $\delta_{\text{H}}$  (400 MHz, CDCl<sub>3</sub>) 7.40 – 7.30 (6H, m, ArH, NH), 5.20 – 5.13 (2H, m, CH<sub>2</sub>), 4.85 (1H, d,  $J = 13.8$  Hz, CHH), 4.79 (1H, dd,  $J = 13.8, 0.5$  Hz, CHH), 4.69 (1H, d,  $J = 7.3$  Hz, CHH), 4.59 (1H, d,  $J = 7.5$  Hz, CHH), 4.47 (1H, d,  $J = 7.3$  Hz, CHH), 4.45 (1H, d,  $J = 7.5$  Hz, CHH), 4.14 (1H, dd,  $J = 18.2, 6.3$  Hz, CHH), 4.02 (1H, dd,  $J = 18.2, 5.5$  Hz, CHH), 3.36 (1H, t,  $J = 4.0$  Hz, CH), 2.26 – 2.14 (2H, m, CH, NH), 1.01 (3H, d,  $J = 6.8$  Hz, CH<sub>3</sub>), 0.91 (3H, d,  $J = 7.0$  Hz, CH<sub>3</sub>);  $\delta_{\text{C}}$  (100 MHz, CDCl<sub>3</sub>) 174.3 (C=O), 169.7 (C=O), 135.2 (C), 128.8 (CH), 128.7 (CH), 128.6 (CH), 79.5 (CH<sub>2</sub>), 77.9 (CH<sub>2</sub>), 77.5 (CH<sub>2</sub>), 67.4 (CH<sub>2</sub>), 62.4 (CH), 59.3 (C), 41.0 (CH<sub>2</sub>), 31.7 (CH), 19.7 (CH<sub>3</sub>), 17.6 (CH<sub>3</sub>); MS (ES<sup>+</sup>)  $m/z$  380 [M+H]<sup>+</sup>, 402 [M+Na]<sup>+</sup>; HRMS (ES<sup>+</sup>) calcd. for C<sub>18</sub>H<sub>25</sub>N<sub>3</sub>NaO<sub>6</sub> [M+Na]<sup>+</sup>: 402.1636; found: 402.1631.

### Benzyl [[3-(1-nitro-2-phenylethyl)oxetan-3-yl]glycyl]glycinate, **4k**

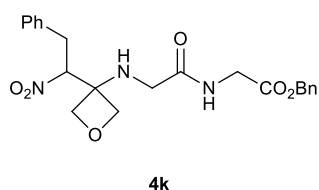

(2-Nitroethyl)benzene (303 mg, 2.00 mmol), 3-oxetanone (167  $\mu$ L, 2.60 mmol) and  $\text{NEt}_3$  (56  $\mu$ L, 0.40 mmol) were stirred at rt for 90 min then diluted with  $\text{CH}_2\text{Cl}_2$  (12.5 mL) and cooled to  $-78^\circ\text{C}$ . To this mixture was added  $\text{NEt}_3$  (559  $\mu$ L, 4.01 mmol), followed by  $\text{MsCl}$  (156  $\mu$ L, 2.01 mmol) dropwise. The reaction mixture was stirred at  $-78^\circ\text{C}$  for 90 min. Meanwhile, to glycylglycine benzyl ester *p*-toluene sulfonate salt (1.74 g, 4.41 mmol) in  $\text{CH}_2\text{Cl}_2$  (10 mL) was added  $\text{NEt}_3$  (559  $\mu$ L, 4.01 mmol). This mixture was stirred at rt for 10 min before being added to the oxetane solution at  $-78^\circ\text{C}$ . The combined mixture was allowed to warm to rt overnight before being quenched with sat.  $\text{NH}_4\text{Cl}$  (20 mL). The mixture was extracted with  $\text{CH}_2\text{Cl}_2$  (3 x 50 mL) and EtOAc (1 x 50 mL), and the combined organics dried over  $\text{MgSO}_4$ , filtered and concentrated *in vacuo*. Purification by repeat column chromatography (65  $\rightarrow$  100% EtOAc in heptane; 45  $\rightarrow$  80% EtOAc in heptane) provided **4k** (549 mg, 64%) as a sticky yellow solid.  $R_f = 0.23$  (80% EtOAc in heptane); IR (KBr) 3379, 3342, 2956, 2887, 1744, 1668, 1605, 1549, 1521, 1497, 1455, 1189, 1030, 736, 698  $\text{cm}^{-1}$ ;  $\delta_{\text{H}}$  (700 MHz,  $\text{CDCl}_3$ ) 7.39 – 7.28 (9H, m, ArH, NH), 7.22 (2H, d,  $J = 7.3$  Hz, ArH), 5.19 (2H, s,  $\text{CH}_2$ ), 5.17 (1H, dd,  $J = 10.3, 3.8$  Hz, CH), 4.66 (1H, d,  $J = 7.7$  Hz, CHH), 4.61 (1H, d,  $J = 7.7$  Hz, CHH), 4.59 (1H, d,  $J = 8.0$  Hz, CHH), 4.53 (1H, d,  $J = 8.0$  Hz, CHH), 4.20 (1H, dd,  $J = 18.4, 6.1$  Hz, CHH), 4.06 (1H, dd,  $J = 18.4, 6.1$  Hz, CHH), 3.66 (1H, d,  $J = 17.2$  Hz, CHH), 3.60 (1H, d,  $J = 17.2$  Hz, CHH), 3.56 (1H, dd,  $J = 14.8, 10.3$  Hz, CHH), 3.28 (1H, dd,  $J = 14.8, 3.8$  Hz, CHH), 2.51 (1H, br s, NH);  $\delta_{\text{C}}$  (175 MHz,  $\text{CDCl}_3$ ) 171.3 (C=O), 169.7 (C=O), 135.2 (C), 135.2 (C), 129.3 (CH), 128.8 (CH), 128.8 (CH), 128.7 (CH), 128.6 (CH), 127.9 (CH), 93.3 (CH), 77.0 ( $\text{CH}_2$ ), 76.6 ( $\text{CH}_2$ ), 67.5 ( $\text{CH}_2$ ), 62.4 (C), 46.1 ( $\text{CH}_2$ ), 41.2 ( $\text{CH}_2$ ), 34.8 ( $\text{CH}_2$ ); MS ( $\text{ES}^+$ )  $m/z$  428  $[\text{M}+\text{H}]^+$ , 450  $[\text{M}+\text{Na}]^+$ ; HRMS ( $\text{ES}^+$ ) calcd. for  $\text{C}_{22}\text{H}_{26}\text{N}_3\text{O}_6$   $[\text{M}+\text{H}]^+$ : 428.1816; found: 428.1812.

## Synthesis of the Tripeptides, 1a-f.

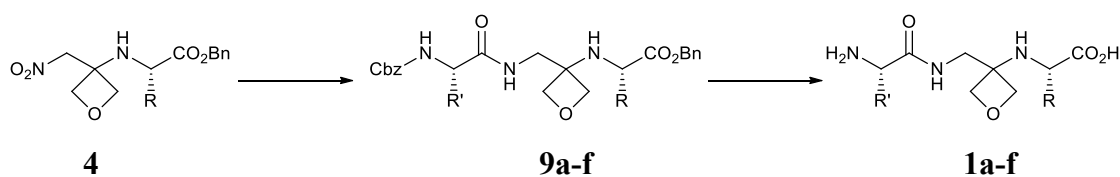

### General Method A: Nitro reduction<sup>[1]</sup> and amide coupling.<sup>[2]</sup>

To a stirred suspension of the nitro compound (**4**) (1.0 molar equiv) in THF/H<sub>2</sub>O (1:3, 1.0 mL) was added In metal (4.0 molar equiv), followed by 6 M HCl (6.0 molar equiv). The reaction mixture was stirred at rt for 90 min, then basified with sat. NaHCO<sub>3</sub> (8 mL) and diluted with EtOAc (20 mL). The solution was filtered through Celite<sup>®</sup> and extracted with EtOAc (3 x 20 mL). The combined organics were dried over MgSO<sub>4</sub>, filtered and concentrated *in vacuo* to give the crude amine. To this amine (1.0 molar equiv) was added the Cbz protected amino acid (1.03 molar equiv), HOBt (0.15 molar equiv), 4-methylmorpholine (2.2 molar equiv) in EtOH. The reaction mixture was cooled in an ice-water bath before EDC·HCl (1.2 molar equiv) was added. The reaction mixture was stirred at rt for 18 h before water (18 mL) was added and the solution extracted with EtOAc (4 x 30 mL). The combined organics were dried over MgSO<sub>4</sub>, filtered and concentrated *in vacuo*. Purification by column chromatography provided the product.

### General Method B: Deprotection to tripeptides,<sup>[3]</sup> 1a-f.

A suspension of the protected oxetane tripeptide (**9a-f**) and 10% Pd/C (20% by wt) in MeOH was stirred under an atmosphere of hydrogen at rt for 18 h then filtered through Celite<sup>®</sup>, washed with MeOH and concentrated *in vacuo* to give the product.

### [3-[(2-Aminoacetamido)methyl]oxetan-3-yl]-L-valine, 1a

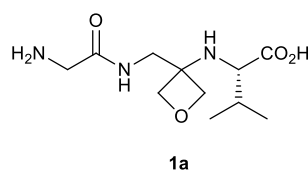

**4b** (97 mg, 0.30 mmol), In metal (142 mg, 1.24 mmol) and 6 M HCl (0.31 mL, 1.86 mmol) were reacted according to General Method A. The crude amine was further reacted with Z-Gly-OH (68 mg, 0.33 mmol), HOBt (8 mg, 0.05 mmol), NMM (75  $\mu$ L, 0.68 mmol), EDC·HCl (70 mg, 0.37 mmol) in EtOH (3.1 mL). Work-up, followed by purification by column chromatography (60  $\rightarrow$  80% EtOAc in hexane) provided **9a** as a colourless oil (71 mg, 49%).  $R_f$  = 0.31 (80% EtOAc in petroleum ether);  $[\alpha]_D^{33} +12.3$  ( $c$  0.22, CHCl<sub>3</sub>); IR (thin film) 3316, 2960, 2875, 1722, 1666, 1520, 1456, 1241, 1152, 974, 737, 699 cm<sup>-1</sup>;  $\delta_H$  (400

MHz, CDCl<sub>3</sub>) 7.39 – 7.29 (10H, m, ArH), 6.50 (1H, br s, NH), 5.41 (1H, br s, NH), 5.16 – 5.08 (4H, m, CH<sub>2</sub>), 4.37 (1H, d, *J* = 6.4 Hz, CHH), 4.30 (1H, d, *J* = 6.5 Hz, CHH), 4.23 (1H, d, *J* = 6.5 Hz, CHH), 4.18 (1H, d, *J* = 6.4 Hz, CHH), 3.86 (2H, d, *J* = 5.5 Hz, CH<sub>2</sub>), 3.78 (1H, dd, *J* = 14.0, 5.8 Hz, CHH), 3.41 (1H, dd, *J* = 14.0, 4.9 Hz, CHH), 3.12 (1H, d, *J* = 5.3 Hz, CH), 2.01 – 1.65 (2H, m, CH, NH), 0.94 (3H, d, *J* = 6.8 Hz, CH<sub>3</sub>), 0.87 (3H, d, *J* = 6.8 Hz, CH<sub>3</sub>); δ<sub>C</sub> (100 MHz, CDCl<sub>3</sub>) 176.0 (C=O), 169.7 (C=O), 156.7 (C=O), 136.2 (C), 135.3 (C), 128.8 (CH), 128.7 (CH), 128.7 (CH), 128.6 (CH), 128.3 (CH), 128.2 (CH), 79.7 (CH<sub>2</sub>), 79.4 (CH<sub>2</sub>), 67.3 (CH<sub>2</sub>), 67.2 (CH<sub>2</sub>), 61.1 (CH), 59.4 (C), 44.7 (CH<sub>2</sub>), 43.6 (CH<sub>2</sub>), 32.0 (CH), 19.5 (CH<sub>3</sub>), 17.9 (CH<sub>3</sub>); MS (ES<sup>+</sup>) *m/z* 484 [M+H]<sup>+</sup>, 506 [M+Na]<sup>+</sup>; HRMS (ES<sup>+</sup>) calcd. for C<sub>26</sub>H<sub>34</sub>N<sub>3</sub>O<sub>6</sub> [M+H]<sup>+</sup>: 484.2442; found: 484.2444. **9a** (73 mg, 0.15 mmol) and 10% Pd/C (15 mg) in MeOH (3 mL) were further reacted according to General Method B to give **1a** (33 mg, 84%) as a cream oily solid. [α]<sub>D</sub><sup>25</sup> +12.3 (*c* 0.20, MeOH); IR (thin film) 3266, 3077, 2963, 2879, 1682, 1568, 1557, 1470, 1436, 1393 cm<sup>-1</sup>; δ<sub>H</sub> (500 MHz, D<sub>2</sub>O) 4.68 (1H, d, *J* = 7.3 Hz, CHH), 4.62 (1H, d, *J* = 7.3 Hz, CHH), 4.50 (1H, d, *J* = 7.3 Hz, CHH), 4.43 (1H, d, *J* = 7.3 Hz, CHH), 3.86 (2H, s, CH<sub>2</sub>), 3.79 (1H, d, *J* = 14.3 Hz, CHH), 3.65 (1H, d, *J* = 14.3 Hz, CHH), 3.13 (1H, d, *J* = 5.2 Hz, CH), 1.98 – 1.87 (1H, m, CH), 0.95 (3H, d, *J* = 7.6 Hz, CH<sub>3</sub>), 0.94 (3H, d, *J* = 7.6 Hz, CH<sub>3</sub>); δ<sub>C</sub> (125 MHz, D<sub>2</sub>O) 181.2 (C=O), 167.9 (C=O), 79.0 (CH<sub>2</sub>), 78.8 (CH<sub>2</sub>), 64.2 (CH), 59.9 (C), 43.3 (CH<sub>2</sub>), 40.5 (CH<sub>2</sub>), 31.3 (CH), 18.3 (CH<sub>3</sub>), 18.2 (CH<sub>3</sub>); MS (ES<sup>+</sup>) *m/z* 260 [M+H]<sup>+</sup>, 282 [M+Na]<sup>+</sup>; HRMS (ES<sup>+</sup>) calcd. for C<sub>11</sub>H<sub>22</sub>N<sub>3</sub>O<sub>4</sub> [M+H]<sup>+</sup>: 260.1605; found: 260.1605.

### [3-(((S)-2-Aminopropanamido)methyl]oxetan-3-yl]-L-valine, **1b**

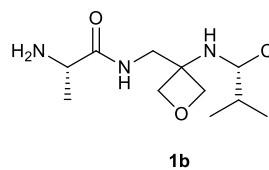

**4b** (101 mg, 0.31 mmol), In metal (146 mg, 1.27 mmol) and 6 M HCl (0.31 mL, 1.86 mmol) were reacted according to General Method A. The crude amine was further reacted with Z-L-Ala-OH (72 mg, 0.32 mmol), HOBT (8 mg, 0.05 mmol), NMM (75 μL, 0.68 mmol), EDC·HCl (71 mg, 0.37 mmol) in EtOH (3.1 mL). Work-up, followed by purification by column chromatography (50 → 70% EtOAc in hexane) provided **9b** (69 mg, 44%) as a colourless oil. *R*<sub>f</sub> = 0.31 (70% EtOAc in hexane); [α]<sub>D</sub><sup>20</sup> +9.4 (*c* 0.16, CHCl<sub>3</sub>); IR (thin film) 3327, 2962, 2876, 1721, 1663, 1521, 1499, 1456, 1239, 1178, 1153, 974, 737, 697 cm<sup>-1</sup>; δ<sub>H</sub> (400 MHz, CDCl<sub>3</sub>) 7.39 – 7.28 (10H, m, ArH), 6.48 (1H, br s, NH), 5.31 (1H, br s, NH), 5.14 (1H, d, *J* = 12.1 Hz, CHH), 5.11 (1H, d, *J* = 12.1 Hz, CHH), 5.10 (2H, s, CH<sub>2</sub>), 4.35 (1H, d, *J* = 6.5 Hz, CHH), 4.28 (1H, d, *J* = 6.5 Hz, CHH), 4.25 – 4.19 (2H, m, CHH, CH), 4.17 (1H, d,

$J = 6.5$  Hz, CHH), 3.75 (1H, dd,  $J = 13.9, 5.8$  Hz, CHH), 3.39 (1H, dd,  $J = 13.9, 4.9$  Hz, CHH), 3.13 (1H, d,  $J = 5.5$  Hz, CH), 2.03 – 1.89 (2H, m, CH, NH), 1.38 (3H, d,  $J = 7.0$  Hz, CH<sub>3</sub>), 0.94 (3H, d,  $J = 6.8$  Hz, CH<sub>3</sub>), 0.87 (3H, d,  $J = 6.8$  Hz, CH<sub>3</sub>);  $\delta_{\text{C}}$  (100 MHz, CDCl<sub>3</sub>) 176.1 (C=O), 173.0 (C=O), 156.0 (C=O), 136.3 (C), 135.3 (C), 128.8 (CH), 128.8 (CH), 128.7 (CH), 128.7 (CH), 128.4 (CH), 128.2 (CH), 79.7 (CH<sub>2</sub>), 79.4 (CH<sub>2</sub>), 67.2 (CH<sub>2</sub>), 67.1 (CH<sub>2</sub>), 61.1 (CH), 59.5 (C), 50.9 (CH), 43.7 (CH<sub>2</sub>), 32.0 (CH), 19.6 (CH<sub>3</sub>), 18.8 (CH<sub>3</sub>), 18.0 (CH<sub>3</sub>); MS (ES<sup>+</sup>)  $m/z$  520 [M+Na]<sup>+</sup>; HRMS (ES<sup>+</sup>) calcd. for C<sub>27</sub>H<sub>35</sub>N<sub>3</sub>NaO<sub>6</sub> [M+Na]<sup>+</sup>: 520.2418; found: 520.2420. **9b** (53 mg, 0.11 mmol) and 10% Pd/C (11 mg) in MeOH (2.13 mL) were further reacted according to General Method B to give **1b** (29 mg, 100%) as a cream solid. M.p. 113-114 °C;  $[\alpha]_{\text{D}}^{25} +31.5$  ( $c$  0.16, MeOH); IR (thin film) 3245, 2960, 2876, 1672, 1558, 1539, 1468, 1393 cm<sup>-1</sup>;  $\delta_{\text{H}}$  (400 MHz, D<sub>2</sub>O) 4.65 (1H, d,  $J = 7.0$ , CHH), 4.60 (1H, d,  $J = 7.3$ , CHH), 4.48 (1H, d,  $J = 7.3$ , CHH), 4.40 (1H, d,  $J = 7.0$ , CHH), 4.03 (1H, q,  $J = 7.0$ , CH), 3.75 (1H, d,  $J = 14.3$ , CHH), 3.59 (1H, d,  $J = 14.3$ , CHH), 3.07 (1H, d,  $J = 5.3$ , CH), 1.95 – 1.83 (1H, m, CH), 1.52 (3H, d,  $J = 7.0$ , CH<sub>3</sub>), 0.93 (6H, d,  $J = 6.8$ , CH<sub>3</sub>);  $\delta_{\text{C}}$  (100 MHz, D<sub>2</sub>O) 182.3 (C=O), 172.6 (C=O), 79.4 (CH<sub>2</sub>), 79.2 (CH<sub>2</sub>), 64.1 (CH), 59.7 (C), 49.4 (CH), 43.6 (CH<sub>2</sub>), 31.5 (CH), 18.5 (CH<sub>3</sub>), 18.2 (CH<sub>3</sub>), 17.0 (CH<sub>3</sub>); MS (ES<sup>+</sup>)  $m/z$  274 [M+H]<sup>+</sup>, 296 [M+Na]<sup>+</sup>; HRMS (ES<sup>+</sup>) calcd. for C<sub>12</sub>H<sub>24</sub>N<sub>3</sub>O<sub>4</sub> [M+H]<sup>+</sup>: 274.1761; found: 274.1769.

### [3-(((S)-2-Amino-3-phenylpropanamido)methyl)oxetan-3-yl]-L-isoleucine, **1c**

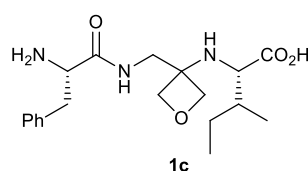

**4g** (100 mg, 0.30 mmol), In metal (137 mg, 1.19 mmol) and 6 M HCl (298  $\mu$ L, 1.79 mmol) were reacted according to General Method A. The crude amine was further reacted with Z-L-Phe-OH (95 mg, 0.32 mmol), HOBT (7 mg, 0.05 mmol), NMM (72  $\mu$ L, 0.65 mmol), EDC·HCl (70 mg, 0.37 mmol) in EtOH (3 mL). Work-up, followed by purification by column chromatography (30  $\rightarrow$  50% EtOAc in hexane) provided **9c** (102 mg, 58%) as a colourless oil.  $R_{\text{f}} = 0.31$  (50% EtOAc in hexane);  $[\alpha]_{\text{D}}^{23} +16.3$  ( $c$  0.20, CHCl<sub>3</sub>); IR (thin film) 3313, 3033, 2963, 2876, 1724, 1663, 1523, 1498, 1456, 1255, 1174, 976, 746, 698 cm<sup>-1</sup>;  $\delta_{\text{H}}$  (400 MHz, CDCl<sub>3</sub>) 7.39 – 7.20 (13H, m, ArH), 7.18 (2H, d,  $J = 7.3$  Hz, ArH), 6.17 – 6.12 (1H, m, NH), 5.41 (1H, d,  $J = 7.5$  Hz, NH), 5.10 (1H, d,  $J = 12.3$  Hz, CHH), 5.08 (2H, s, CH<sub>2</sub>), 5.07 (1H, d,  $J = 12.3$  Hz, CHH), 4.43 – 4.36 (1H, m, CH), 4.28 (1H, d,  $J = 6.5$  Hz, CHH), 4.14 (1H, d,  $J = 6.5$  Hz, CHH), 4.06 (1H, d,  $J = 6.5$  Hz, CHH), 4.01 (1H, d,  $J = 6.5$  Hz, CHH), 3.64 (1H, dd,  $J = 13.9, 5.4$  Hz, CHH), 3.32 (1H, dd,  $J = 13.9, 4.9$  Hz, CHH), 3.16

(1H, dd,  $J = 13.7, 5.8$  Hz, CHH), 3.05 (1H, d,  $J = 5.8$  Hz, CH), 2.99 (1H, dd,  $J = 13.7, 7.8$  Hz, CHH), 1.83 (1H, br s, NH), 1.64 – 1.54 (1H, m, CH), 1.39 – 1.28 (1H, m, CHH), 1.04 – 0.90 (1H, m, CHH), 0.83 – 0.78 (6H, m, CH<sub>3</sub>);  $\delta_C$  (100 MHz, CDCl<sub>3</sub>) 176.0 (C=O), 171.3 (C=O), 155.9 (C=O), 136.6 (C), 136.3 (C), 135.2 (C), 129.4 (CH), 128.9 (CH), 128.8 (CH), 128.7 (CH), 128.7 (CH), 128.4 (CH), 128.2 (CH), 127.2 (CH), 79.7 (CH<sub>2</sub>), 79.6 (CH<sub>2</sub>), 67.2 (2 x CH<sub>2</sub>), 60.2 (CH), 59.0 (C), 56.5 (CH), 43.7 (CH<sub>2</sub>), 38.9 (CH<sub>2</sub>), 38.8 (CH), 24.9 (CH<sub>2</sub>), 15.9 (CH<sub>3</sub>), 11.6 (CH<sub>3</sub>); MS (ES<sup>+</sup>)  $m/z$  588 [M+H]<sup>+</sup>, 610 [M+Na]<sup>+</sup>; HRMS (ES<sup>+</sup>) calcd. for C<sub>34</sub>H<sub>42</sub>N<sub>3</sub>O<sub>6</sub> [M+H]<sup>+</sup>: 588.3068; found: 588.3050. **9c** (91 mg, 0.15 mmol) and 10% Pd/C (18 mg) in MeOH (3.1 mL) were further reacted according to General Method B to give **1c** (54 mg, 96%) as a pale orange solid. M.p. 162 – 164 °C (dec);  $[\alpha]_D^{26} +43.2$  ( $c$  0.18, MeOH); IR (thin film) 3313, 3030, 2958, 2874, 1670, 1560, 1555, 1497, 1453, 1437, 1387, 972, 742, 696 cm<sup>-1</sup>;  $\delta_H$  (500 MHz, DMSO-*d*<sub>6</sub>) 8.20 (1H, br t,  $J = 5.4$  Hz, NH), 7.31 – 7.26 (2H, m, ArH), 7.25 – 7.18 (3H, m, ArH), 4.34 (1H, d,  $J = 6.2$  Hz, CHH), 4.31 (1H, d,  $J = 6.3$  Hz, CHH), 4.18 (1H, d,  $J = 6.3$  Hz, CHH), 4.13 (1H, d,  $J = 6.2$  Hz, CHH), 3.61 (1H, dd,  $J = 7.8, 5.4$  Hz, CH), 3.48 – 3.40 (2H, m, CH<sub>2</sub>), 3.10 (1H, d,  $J = 5.5$  Hz, CH), 3.00 (1H, dd,  $J = 13.6, 5.4$  Hz, CHH), 2.74 (1H, dd,  $J = 13.6, 7.8$  Hz, CHH), 1.59 – 1.44 (2H, m, CH and CHH), 1.12 – 1.01 (1H, m, CHH), 0.87 – 0.79 (6H, m, CH<sub>3</sub>);  $\delta_C$  (125 MHz, DMSO-*d*<sub>6</sub>) 177.2 (C=O), 173.2 (C=O), 137.6 (C), 129.3 (CH), 128.2 (CH), 126.4 (CH), 78.5 (CH<sub>2</sub>), 78.2 (CH<sub>2</sub>), 60.1 (CH), 59.8 (C), 55.4 (CH), 43.4 (CH<sub>2</sub>), 39.7 (CH<sub>2</sub>), 38.1 (CH), 24.5 (CH<sub>2</sub>), 15.7 (CH<sub>3</sub>), 11.6 (CH<sub>3</sub>); MS (ES<sup>+</sup>)  $m/z$  364 [M+H]<sup>+</sup>, 386 [M+Na]<sup>+</sup>; HRMS (ES<sup>+</sup>) calcd. for C<sub>19</sub>H<sub>30</sub>N<sub>3</sub>O<sub>4</sub> [M+H]<sup>+</sup>: 364.2231; found: 364.2228.

### [3-[[[(S)-2-Amino-3-methylbutanamido)methyl]oxetan-3-yl]-L-valine, **1d**

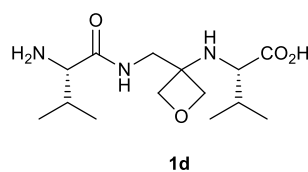

**4b** (102 mg, 0.32 mmol), In metal (144 mg, 1.25 mmol) and 6 M HCl (0.31 mL, 1.86 mmol) were reacted according to General Method A. The crude amine was further reacted with Z-L-Val-OH (82 mg, 0.33 mmol), HOBT (8 mg, 0.05 mmol), NMM (75  $\mu$ L, 0.68 mmol), EDC·HCl (73 mg, 0.38 mmol) in EtOH (3.1 mL). Work-up, followed by purification by column chromatography (35 → 50% EtOAc in hexane) provided **9d** (78 mg, 47%) as a white oily solid.  $R_f = 0.24$  (50% EtOAc in hexane);  $[\alpha]_D^{20} +20.5$  ( $c$  0.20, CHCl<sub>3</sub>); IR (thin film) 3311, 2963, 2876, 1723, 1659, 1521, 1498, 1456, 1233, 1177, 1152, 1027, 976, 737, 696 cm<sup>-1</sup>;  $\delta_H$  (400 MHz, CDCl<sub>3</sub>) 7.39 – 7.28 (10H, m, ArH), 6.46 – 6.41 (1H, m, NH), 5.39 (1H, d,  $J = 8.3$  Hz, NH), 5.14 (1H, d,  $J = 12.1$  Hz, CHH), 5.11 (1H, d,  $J = 12.1$  Hz, CHH),

5.10 (2H, s, CH<sub>2</sub>), 4.35 (1H, d, *J* = 6.5 Hz, CHH), 4.29 (1H, d, *J* = 6.5 Hz, CHH), 4.22 (1H, d, *J* = 6.5 Hz, CHH), 4.17 (1H, d, *J* = 6.5 Hz, CHH), 3.99 (1H, dd, *J* = 8.3, 6.0 Hz, CH), 3.74 (1H, dd, *J* = 13.8, 5.5 Hz, CHH), 3.42 (1H, dd, *J* = 13.8, 5.0 Hz, CHH), 3.13 (1H, d, *J* = 5.3 Hz, CH), 2.22 – 2.09 (1H, m, CH), 2.07 – 1.90 (2H, m, CH, NH), 0.98 – 0.93 (6H, m, CH<sub>3</sub>), 0.91 (3H, d, *J* = 7.0 Hz, CH<sub>3</sub>), 0.87 (3H, d, *J* = 6.8 Hz, CH<sub>3</sub>);  $\delta_{\text{C}}$  (100 MHz, CDCl<sub>3</sub>) 176.1 (C=O), 171.8 (C=O), 156.5 (C=O), 136.4 (C), 135.3 (C), 128.8 (CH), 128.8 (CH), 128.7 (CH), 128.7 (CH), 128.3 (CH), 128.2 (CH), 79.7 (CH<sub>2</sub>), 79.5 (CH<sub>2</sub>), 67.2 (CH<sub>2</sub>), 67.2 (CH<sub>2</sub>), 61.1 (CH), 60.8 (CH), 59.4 (C), 43.7 (CH<sub>2</sub>), 32.0 (CH), 31.0 (CH), 19.6 (CH<sub>3</sub>), 19.3 (CH<sub>3</sub>), 18.0 (CH<sub>3</sub>), 17.9 (CH<sub>3</sub>); MS (ES<sup>+</sup>) *m/z* 526 [M+H]<sup>+</sup>, 548 [M+Na]<sup>+</sup>; HRMS (ES<sup>+</sup>) calcd. for C<sub>29</sub>H<sub>39</sub>N<sub>4</sub>NaO<sub>6</sub> [M+Na]<sup>+</sup>: 548.2731; found: 548.2724. **9d** (61 mg, 0.12 mmol) and 10% Pd/C (12 mg) in MeOH (2.3 mL) were reacted according to General Method B to give **1d** (33 mg, 94%) as a cream solid. M.p. 102 – 103 °C;  $[\alpha]_{\text{D}}^{25}$  +56.6 (*c* 0.16, MeOH); IR (thin film) 3244, 2960, 2875, 1680, 1555, 1540, 1467, 1393 cm<sup>-1</sup>;  $\delta_{\text{H}}$  (400 MHz, D<sub>2</sub>O) 4.66 (1H, d, *J* = 7.0 Hz, CHH), 4.61 (1H, d, *J* = 7.3 Hz, CHH), 4.48 (1H, d, *J* = 7.3 Hz, CHH), 4.42 (1H, d, *J* = 7.0 Hz, CHH), 3.77 (1H, d, *J* = 14.3 Hz, CHH), 3.75 (1H, d, *J* = 6.0 Hz, CH), 3.61 (1H, d, *J* = 14.3 Hz, CHH), 3.09 (1H, d, *J* = 5.3 Hz, CH), 2.28 – 2.15 (1H, m, CH), 1.95 – 1.83 (1H, m, CH), 1.04 (3H, d, *J* = 7.0 Hz, CH<sub>3</sub>), 1.03 (3H, d, *J* = 7.0 Hz, CH<sub>3</sub>), 0.93 (6H, d, *J* = 6.8 Hz, CH<sub>3</sub>);  $\delta_{\text{C}}$  (100 MHz, D<sub>2</sub>O) 182.3 (C=O), 171.1 (C=O), 79.3 (CH<sub>2</sub>), 79.1 (CH<sub>2</sub>), 64.1 (CH), 59.7 (C), 59.1 (CH), 43.8 (CH<sub>2</sub>), 31.5 (CH), 30.0 (CH), 18.5 (CH<sub>3</sub>), 18.2 (CH<sub>3</sub>), 17.8 (CH<sub>3</sub>), 16.9 (CH<sub>3</sub>); MS (ES<sup>+</sup>) *m/z* 302 [M+H]<sup>+</sup>, 324 [M+Na]<sup>+</sup>; HRMS (ES<sup>+</sup>) calcd. for C<sub>14</sub>H<sub>28</sub>N<sub>3</sub>O<sub>4</sub> [M+H]<sup>+</sup>: 302.2074; found: 302.2066.

### [3-[[*(S)*-2-Amino-4-methylpentanamido)methyl]oxetan-3-yl]-*L*-isoleucine, **1e**

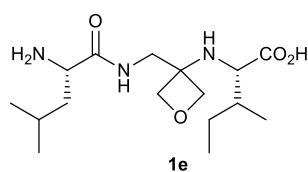

**4g** (104 mg, 0.31 mmol), In metal (145 mg, 1.26 mmol) and 6 M HCl (0.31 mL, 1.86 mmol) were reacted according to General Method A. The crude amine was further reacted with Z-*L*-Leu-OH (98 mg, 0.33 mmol), HOBT (8 mg, 0.05 mmol), NMM (75  $\mu$ L, 0.68

mmol), EDC·HCl (73 mg, 0.38 mmol) in EtOH (3.1 mL). Work-up, followed by purification by repeat column chromatography (30  $\rightarrow$  45% EtOAc in hexane; 2  $\rightarrow$  4% MeOH in CH<sub>2</sub>Cl<sub>2</sub>) provided **9e** (92 mg, 54%) as a colourless oil. *R*<sub>f</sub> = 0.37 (50% EtOAc in hexane);  $[\alpha]_{\text{D}}^{23}$  +9.1 (*c* 0.20, CHCl<sub>3</sub>); IR (thin film) 3314, 3034, 2960, 2875, 1724, 1718, 1660, 1529, 1456, 1237, 1172, 975, 737, 697 cm<sup>-1</sup>;  $\delta_{\text{H}}$  (400 MHz, CDCl<sub>3</sub>) 7.39 – 7.28 (10H, m, ArH), 6.58 – 6.52 (1H, m, NH), 5.23 (1H, d, *J* = 7.8 Hz, NH), 5.12 (2H, s, CH<sub>2</sub>), 5.09 (2H, s, CH<sub>2</sub>), 4.35 (1H, d, *J* =

6.3 Hz, CHH), 4.29 (1H, d,  $J = 6.3$  Hz, CHH), 4.23 – 4.14 (3H, m, CHH, CH), 3.74 (1H, dd,  $J = 14.0, 5.7$  Hz, CHH), 3.39 (1H, dd,  $J = 14.0, 5.0$  Hz, CHH), 3.20 (1H, d,  $J = 5.5$  Hz, CH), 2.03 (1H, br s, NH), 1.75 – 1.60 (3H, m, CHH, CH), 1.55 – 1.37 (2H, m, CHH, CHH), 1.17 – 1.04 (1H, m, CHH), 0.97 – 0.81 (12H, m, CH<sub>3</sub>);  $\delta_C$  (100 MHz, CDCl<sub>3</sub>) 176.1 (C=O), 172.9 (C=O), 156.2 (C=O), 136.3 (C), 135.3 (C), 128.8 (CH), 128.8 (CH), 128.7 (CH), 128.6 (CH), 128.3 (CH), 128.2 (CH), 79.8 (CH<sub>2</sub>), 79.4 (CH<sub>2</sub>), 67.2 (2 x CH<sub>2</sub>), 60.3 (CH), 59.5 (C), 53.8 (CH), 43.7 (CH<sub>2</sub>), 41.7 (CH<sub>2</sub>), 39.0 (CH), 24.9 (CH<sub>2</sub>), 24.9 (CH), 23.0 (CH<sub>3</sub>), 22.1 (CH<sub>3</sub>), 16.0 (CH<sub>3</sub>), 11.7 (CH<sub>3</sub>); MS (ES<sup>+</sup>)  $m/z$  554 [M+H]<sup>+</sup>, 576 [M+Na]<sup>+</sup>; HRMS (ES<sup>+</sup>) calcd. for C<sub>31</sub>H<sub>44</sub>N<sub>3</sub>O<sub>6</sub> [M+H]<sup>+</sup>: 554.3225; found: 554.3210. **9e** (90 mg, 0.16 mmol) and 10% Pd/C (18 mg) in MeOH (3.25 mL) were further reacted according to General Method B to give **1e** (53 mg, 99%) as a pale cream/orange solid. M.p. 130 – 132 °C (dec);  $[\alpha]_D^{25} +36.6$  ( $c$  0.18, MeOH); IR (thin film) 3200, 2960, 2875, 1673, 1557, 1550, 1466, 1391 cm<sup>-1</sup>;  $\delta_H$  (500 MHz, D<sub>2</sub>O) 4.70 (1H, d,  $J = 7.4$  Hz, CHH), 4.64 (1H, d,  $J = 7.6$  Hz, CHH), 4.52 (1H, d,  $J = 7.6$  Hz, CHH), 4.45 (1H, d,  $J = 7.4$  Hz, CHH), 4.05 (1H, t,  $J = 7.3$  Hz, CH), 3.77 (1H, d,  $J = 14.5$  Hz, CHH), 3.66 (1H, d,  $J = 14.5$  Hz, CHH), 3.32 (1H, d,  $J = 4.6$  Hz, CH), 1.81 – 1.65 (4H, m, CH<sub>2</sub> and CH), 1.57 – 1.48 (1H, m, CHH), 1.25 – 1.15 (1H, m, CHH), 0.98 (3H, d,  $J = 6.5$  Hz, CH<sub>3</sub>), 0.96 (3H, d,  $J = 6.5$  Hz, CH<sub>3</sub>), 0.93 – 0.89 (6H, m, CH<sub>3</sub>);  $\delta_C$  (125 MHz, D<sub>2</sub>O) 179.9 (C=O), 171.5 (C=O), 78.3 (CH<sub>2</sub>), 78.0 (CH<sub>2</sub>), 63.0 (CH), 60.4 (C), 52.1 (CH), 43.2 (CH<sub>2</sub>), 39.8 (CH<sub>2</sub>), 38.2 (CH), 25.5 (CH<sub>2</sub>), 23.9 (CH), 21.7 (CH<sub>3</sub>), 20.9 (CH<sub>3</sub>), 14.8 (CH<sub>3</sub>), 11.2 (CH<sub>3</sub>); MS (ES<sup>+</sup>)  $m/z$  330 [M+H]<sup>+</sup>, 352 [M+Na]<sup>+</sup>; HRMS (ES<sup>+</sup>) calcd. for C<sub>16</sub>H<sub>31</sub>N<sub>3</sub>NaO<sub>4</sub> [M+Na]<sup>+</sup>: 352.2207; found: 352.2208.

### [3-[[*(S)*-2-Amino-3-phenylpropanamido)methyl]oxetan-3-yl]-*L*-valine, **1f**

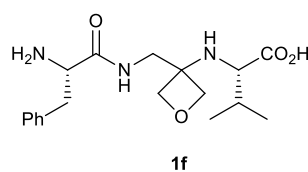

**4b** (101 mg, 0.31 mmol), In metal (145 mg, 1.26 mmol) and 6 M HCl (0.31 mL, 1.86 mmol) were reacted according to General Method A. The crude amine was further reacted with *Z*-*L*-Phe-OH (97 mg, 0.32 mmol), HOBT (9 mg, 0.06 mmol), NMM (75  $\mu$ L, 0.68 mmol), EDC·HCl (73 mg, 0.38 mmol) and EtOH (3.1 mL). Work-up, followed by purification by column chromatography (40 → 50% EtOAc in hexane) provided **9f** (107 mg, 60%) as a colourless oil.  $R_f = 0.26$  (50% EtOAc in hexane);  $[\alpha]_D^{21} +15.5$  ( $c$  0.20, CHCl<sub>3</sub>); IR (thin film) 3320, 2962, 2875, 1724, 1663, 1525, 1498, 1456, 1254, 1179, 1152, 977, 747, 698 cm<sup>-1</sup>;  $\delta_H$  (400 MHz, CDCl<sub>3</sub>) 7.39 – 7.21 (13H, m, ArH), 7.18 (2H, d,  $J = 7.5$  Hz, ArH), 6.19 – 6.13 (1H, m, NH), 5.43 – 5.36 (1H, m, NH), 5.12 – 5.04 (4H, m, CH<sub>2</sub>), 4.43 – 4.35 (1H, m,



CH), 4.28 (1H, d,  $J = 6.5$  Hz, CHH), 4.14 (1H, d,  $J = 6.5$  Hz, CHH), 4.06 (1H, d,  $J = 6.5$  Hz, CHH), 4.02 (1H, d,  $J = 6.5$  Hz, CHH), 3.64 (1H, dd,  $J = 13.9, 5.4$  Hz, CHH), 3.33 (1H, dd,  $J = 13.9, 5.0$  Hz, CHH), 3.15 (1H, dd,  $J = 13.8, 6.3$  Hz, CHH), 3.04 – 2.97 (2H, m, CHH, CH), 1.92 – 1.78 (2H, m, CH, NH), 0.86 (3H, d,  $J = 6.8$  Hz, CH<sub>3</sub>), 0.78 (3H, d,  $J = 6.8$  Hz, CH<sub>3</sub>);  $\delta_C$  (100 MHz, CDCl<sub>3</sub>) 176.0 (C=O), 171.3 (C=O), 155.9 (C=O), 136.6 (C), 136.3 (C), 135.3 (C), 129.4 (CH), 128.9 (CH), 128.8 (CH), 128.8 (CH), 128.7 (CH), 128.6 (CH), 128.3 (CH), 128.2 (CH), 127.2 (CH), 79.6 (CH<sub>2</sub>), 79.6 (CH<sub>2</sub>), 67.2 (CH<sub>2</sub>), 67.2 (CH<sub>2</sub>), 61.0 (CH), 59.0 (C), 56.6 (CH), 43.7 (CH<sub>2</sub>), 38.8 (CH<sub>2</sub>), 32.0 (CH), 19.5 (CH<sub>3</sub>), 18.0 (CH<sub>3</sub>); MS (ES<sup>+</sup>)  $m/z$  596 [M+Na]<sup>+</sup>; HRMS (ES<sup>+</sup>) calcd. for C<sub>33</sub>H<sub>39</sub>N<sub>3</sub>NaO<sub>6</sub> [M+Na]<sup>+</sup>: 596.2731; found: 596.2722. **9f** (89 mg, 0.16 mmol) and 10% Pd/C (18 mg) in MeOH (3.1 mL) were further reacted according to General Method B to give **1f** (52 mg, 96%) as a pale yellow solid. M.p. 165 – 167 °C (dec);  $[\alpha]_D^{26} +41.3$  ( $c$  0.18, MeOH); IR (thin film) 3045, 2958, 2890, 1666, 1559, 1512, 1455, 1436, 1390, 974, 742, 697 cm<sup>-1</sup>;  $\delta_H$  (500 MHz, DMSO-*d*<sub>6</sub>) 8.23 – 8.19 (1H, m, NH), 7.31 – 7.27 (2H, m, ArH), 7.25 – 7.20 (3H, m, ArH), 4.35 (1H, d,  $J = 6.2$  Hz, CHH), 4.29 (1H, d,  $J = 6.3$  Hz, CHH), 4.17 (1H, d,  $J = 6.3$  Hz, CHH), 4.13 (1H, d,  $J = 6.2$  Hz, CHH), 3.67 – 3.63 (1H, m, CH), 3.49 – 3.40 (2H, m, CH<sub>2</sub>), 3.06 (1H, d,  $J = 5.7$  Hz, CH), 3.02 (1H, dd,  $J = 13.6, 5.2$  Hz, CHH), 2.75 (1H, dd,  $J = 13.6, 8.0$  Hz, CHH), 1.87 – 1.79 (1H, m, CH), 0.88 (3H, d,  $J = 6.8$  Hz, CH<sub>3</sub>), 0.83 (3H, d,  $J = 6.8$  Hz, CH<sub>3</sub>);  $\delta_C$  (125 MHz, DMSO-*d*<sub>6</sub>) 177.1 (C=O), 172.8 (C=O), 137.4 (C), 129.4 (CH), 128.3 (CH), 126.5 (CH), 78.4 (CH<sub>2</sub>), 78.2 (CH<sub>2</sub>), 60.7 (CH), 59.7 (C), 55.3 (CH), 43.4 (CH<sub>2</sub>), 38.9 (CH<sub>2</sub>), 31.1 (CH), 19.4 (CH<sub>3</sub>), 18.0 (CH<sub>3</sub>); MS (ES<sup>+</sup>)  $m/z$  350 [M+H]<sup>+</sup>, 372 [M+Na]<sup>+</sup>; HRMS (ES<sup>+</sup>) calcd. for C<sub>18</sub>H<sub>28</sub>N<sub>3</sub>O<sub>4</sub> [M+H]<sup>+</sup>: 350.2074; found: 350.2070.

#### (S)-6-Benzyl-2-oxa-5,8-diazaspiro[3.5]nonan-7-one, **7**

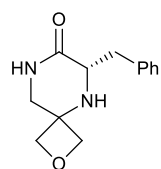

**7**

To a stirred solution of **4h** (98 mg, 0.26 mmol) in glacial AcOH (4.5 mL) was added Zn (628 mg, 9.60 mmol).<sup>[4]</sup> The reaction mixture was stirred vigorously at rt for 67 h then filtered through Celite<sup>®</sup> and concentrated *in vacuo*. The residue was diluted with sat. NaHCO<sub>3</sub> (15 mL) and extracted with EtOAc (3 x 20 mL). The combined organic extracts were dried over MgSO<sub>4</sub>, filtered and concentrated *in vacuo*. Purification by column chromatography (0 → 10% MeOH in EtOAc with 0.5% NEt<sub>3</sub>) provided **7** (42 mg, 68%) as a white solid. M.p. 156 – 158 °C;  $R_f = 0.30$  (10% MeOH in EtOAc);  $[\alpha]_D^{29} -98.9$  ( $c$  0.18, CHCl<sub>3</sub>); IR (thin film) 3286, 3061, 2945, 2869, 1665, 1604, 1495, 1455, 1314, 975, 734, 700 cm<sup>-1</sup>;  $\delta_H$  (400 MHz, CDCl<sub>3</sub>) 7.37 – 7.32 (2H, m,

*ArH*), 7.31 – 7.25 (3H, m, *ArH*), 6.30 (1H, br s, *NH*), 4.57 (1H, d,  $J = 6.5$  Hz, *CHH*), 4.49 (1H, d,  $J = 6.5$  Hz, *CHH*), 4.41 (1H, d,  $J = 7.0$  Hz, *CHH*), 4.38 (1H, d,  $J = 7.0$  Hz, *CHH*), 3.72 (1H, dd,  $J = 10.0, 3.4$  Hz, *CH*), 3.68 (1H, dd,  $J = 11.5, 4.0$  Hz, *CHH*), 3.52 – 3.44 (2H, m, *CHH*), 2.80 (1H, dd,  $J = 13.7, 10.0$  Hz, *CHH*), 1.86 (1H, br s, *NH*);  $\delta_C$  (100 MHz,  $CDCl_3$ ) 170.8 (C=O), 137.8 (C), 129.4 (CH), 129.0 (CH), 127.0 (CH), 81.8 (CH<sub>2</sub>), 79.9 (CH<sub>2</sub>), 56.3 (CH), 55.2 (C), 49.4 (CH<sub>2</sub>), 38.5 (CH<sub>2</sub>); MS ( $ES^+$ )  $m/z$  233 [ $M+H$ ]<sup>+</sup>, 255 [ $M+Na$ ]<sup>+</sup>; HRMS ( $ES^+$ ) calcd. for  $C_{13}H_{16}N_2NaO_2$  [ $M+Na$ ]<sup>+</sup>: 255.1104; found: 255.1106.

**<sup>1</sup>H NMR****Compound (S)-4a**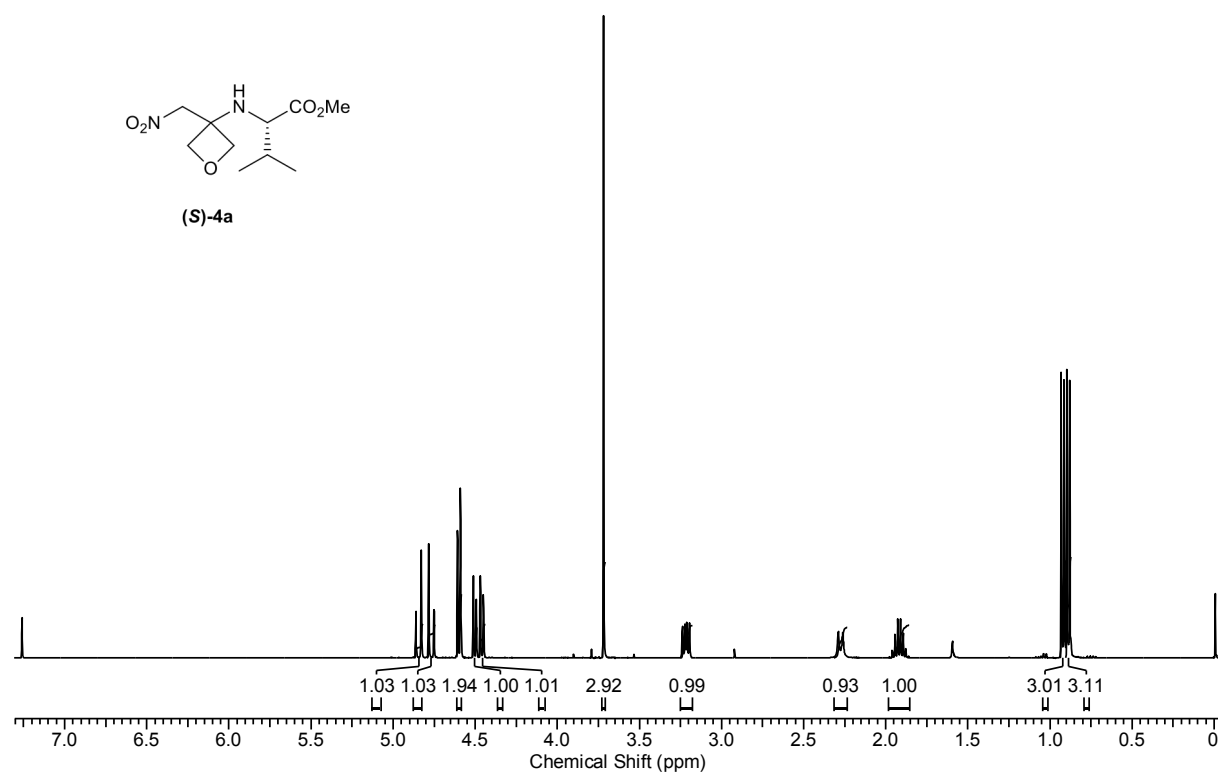**<sup>13</sup>C NMR**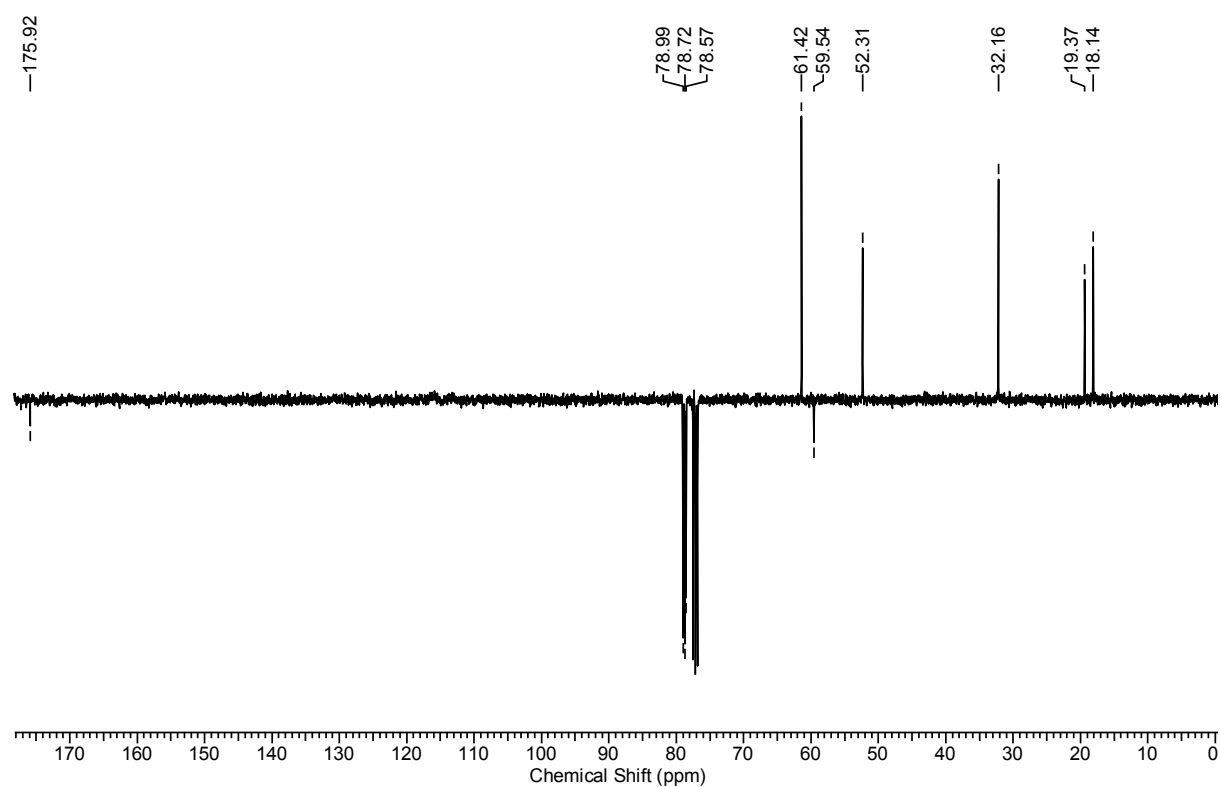

**<sup>1</sup>H NMR****Compound (R)-4a**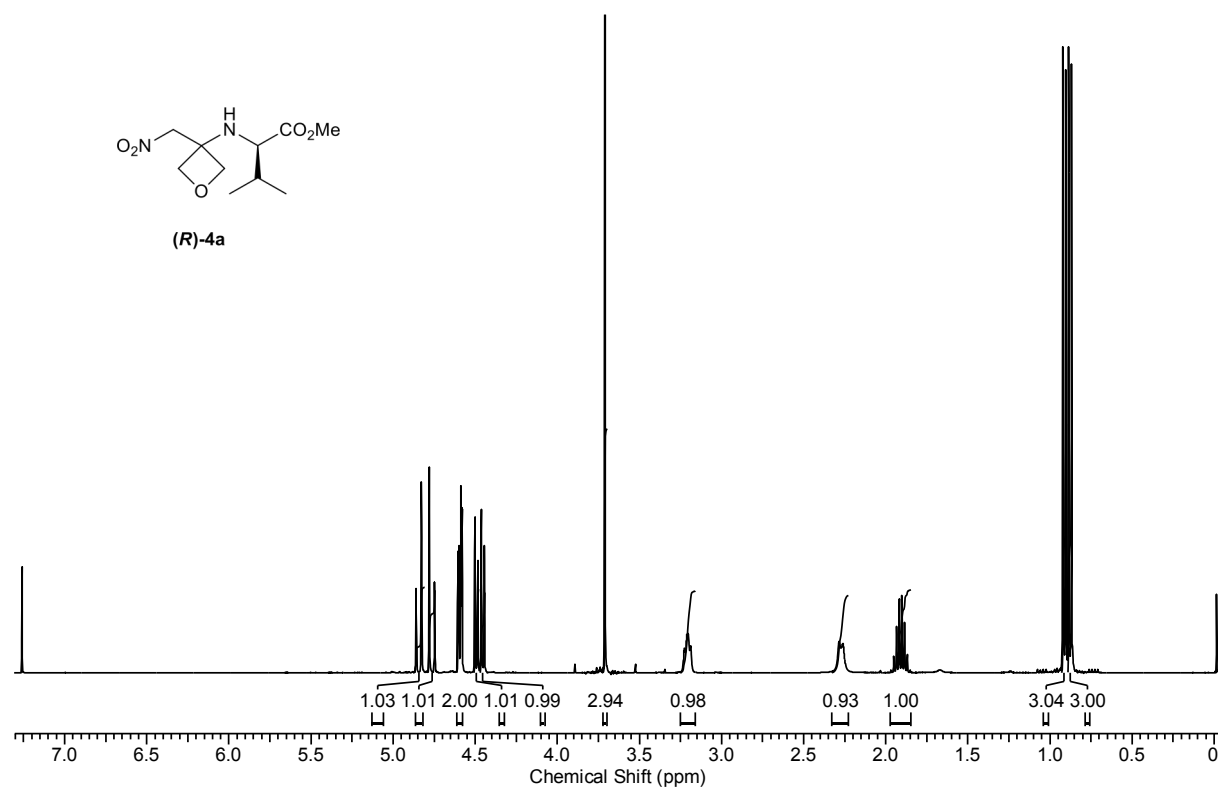**<sup>13</sup>C NMR**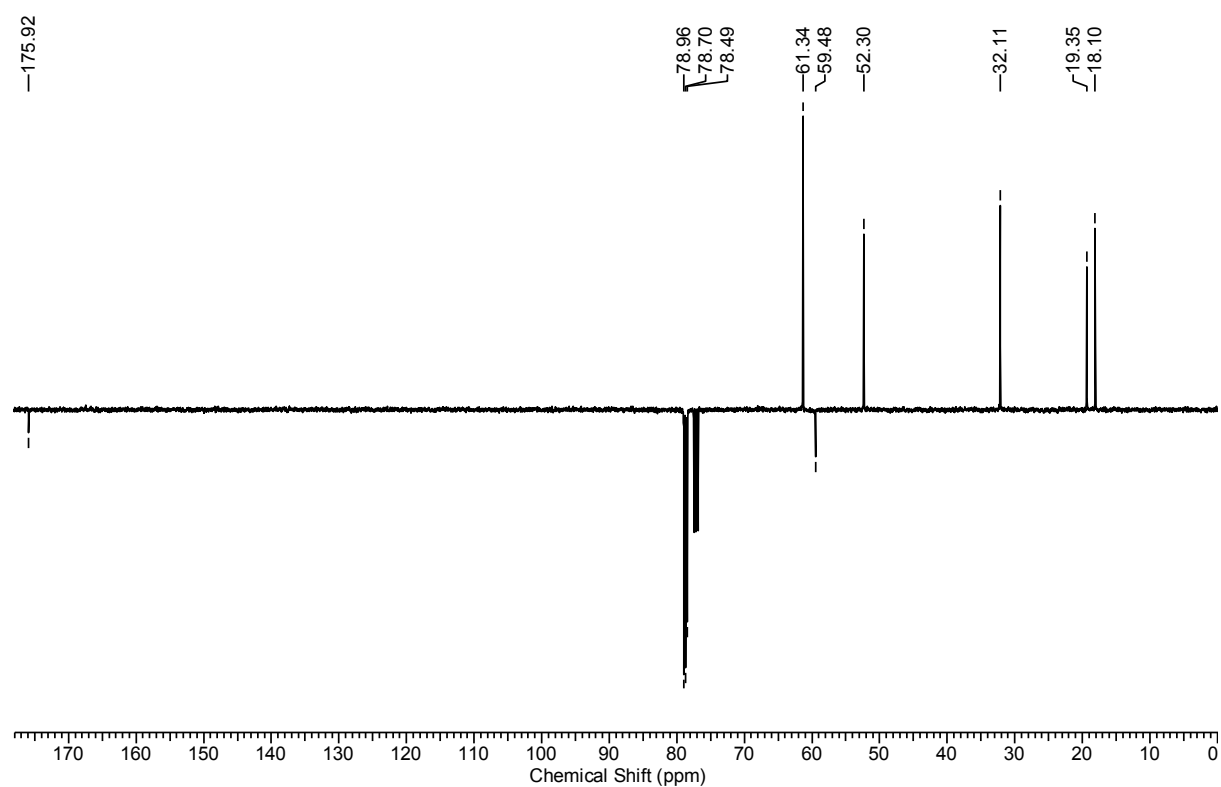

**<sup>1</sup>H NMR****Compound 4b**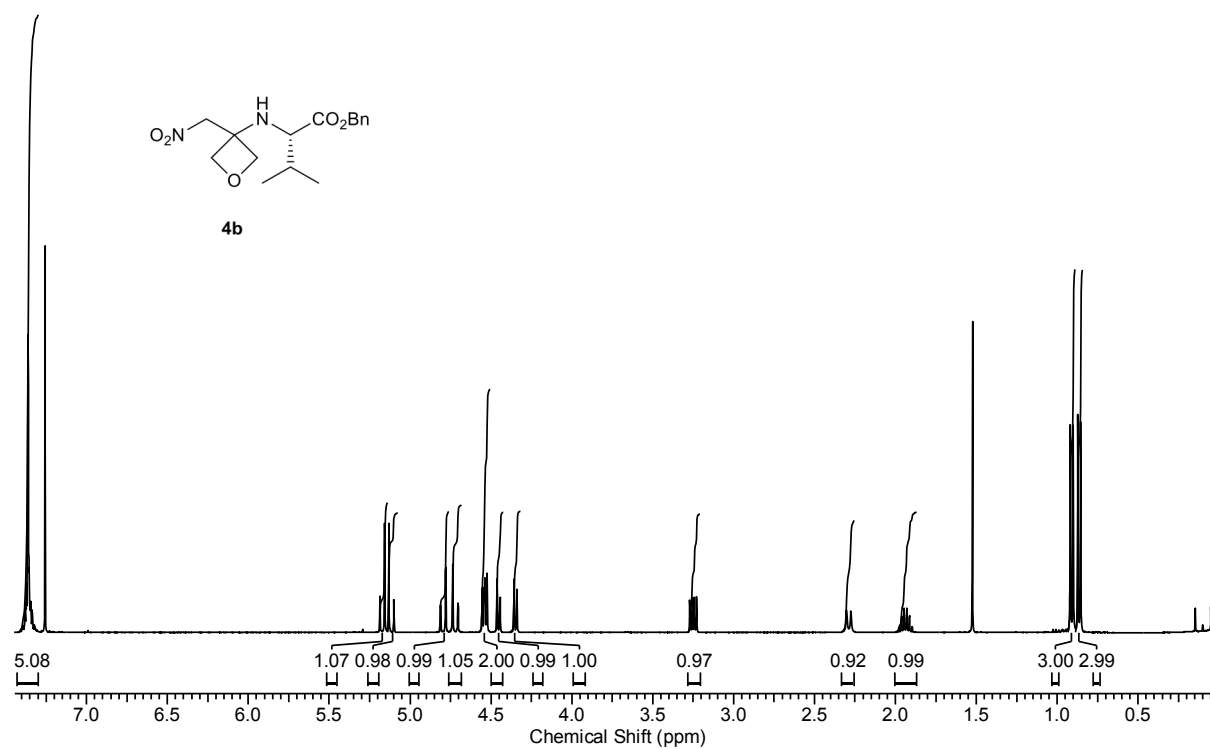**<sup>13</sup>C NMR**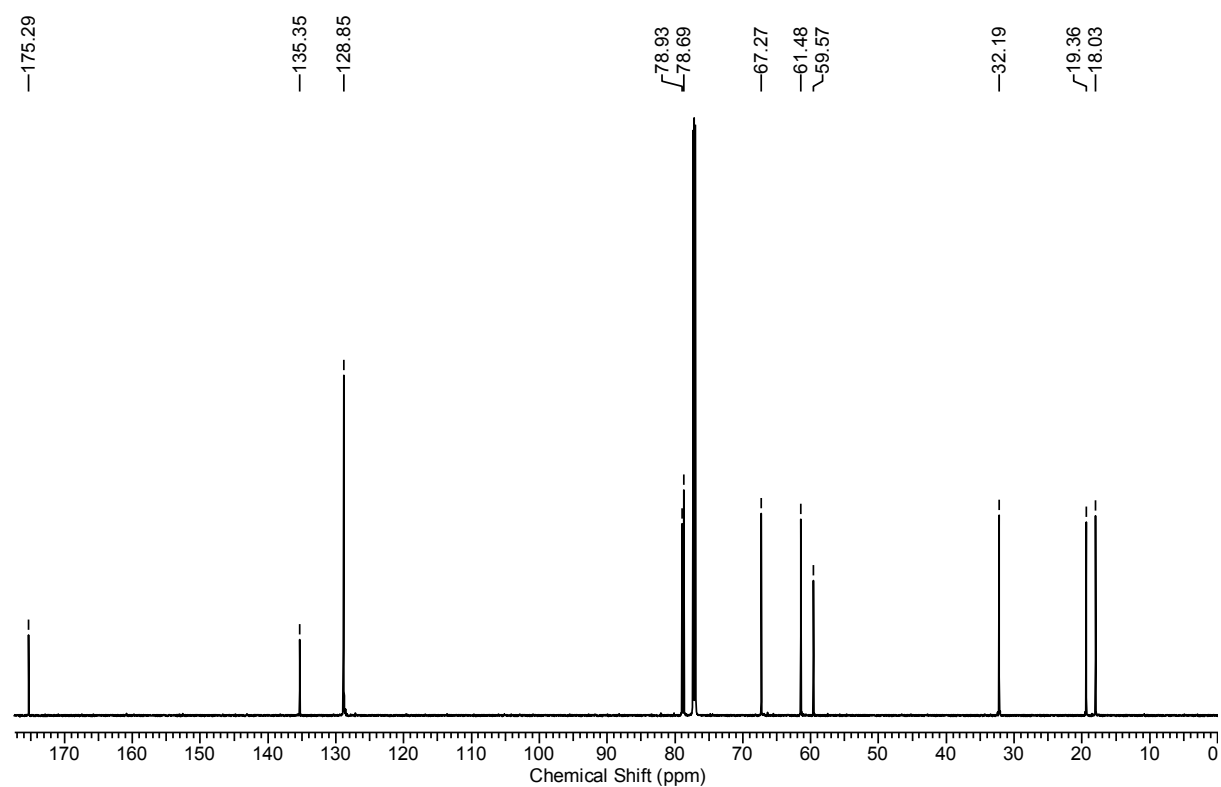

**<sup>1</sup>H NMR****Compound 4c**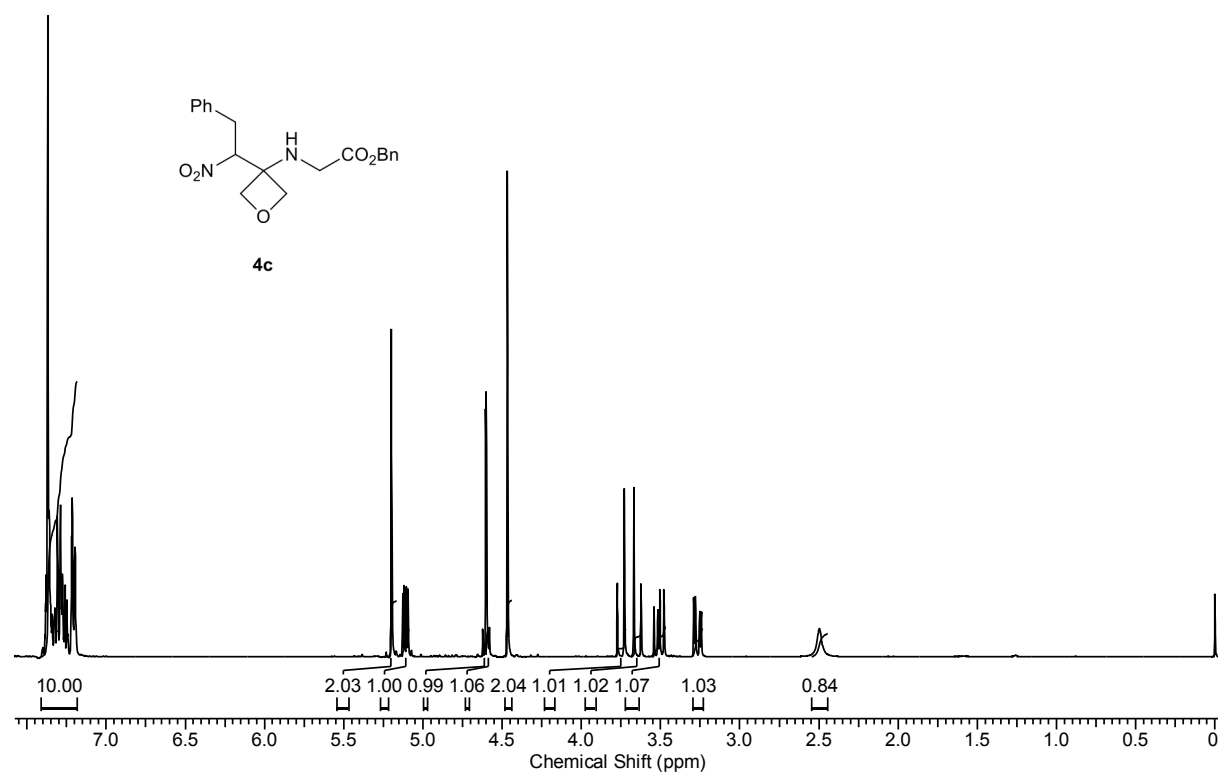**<sup>13</sup>C NMR**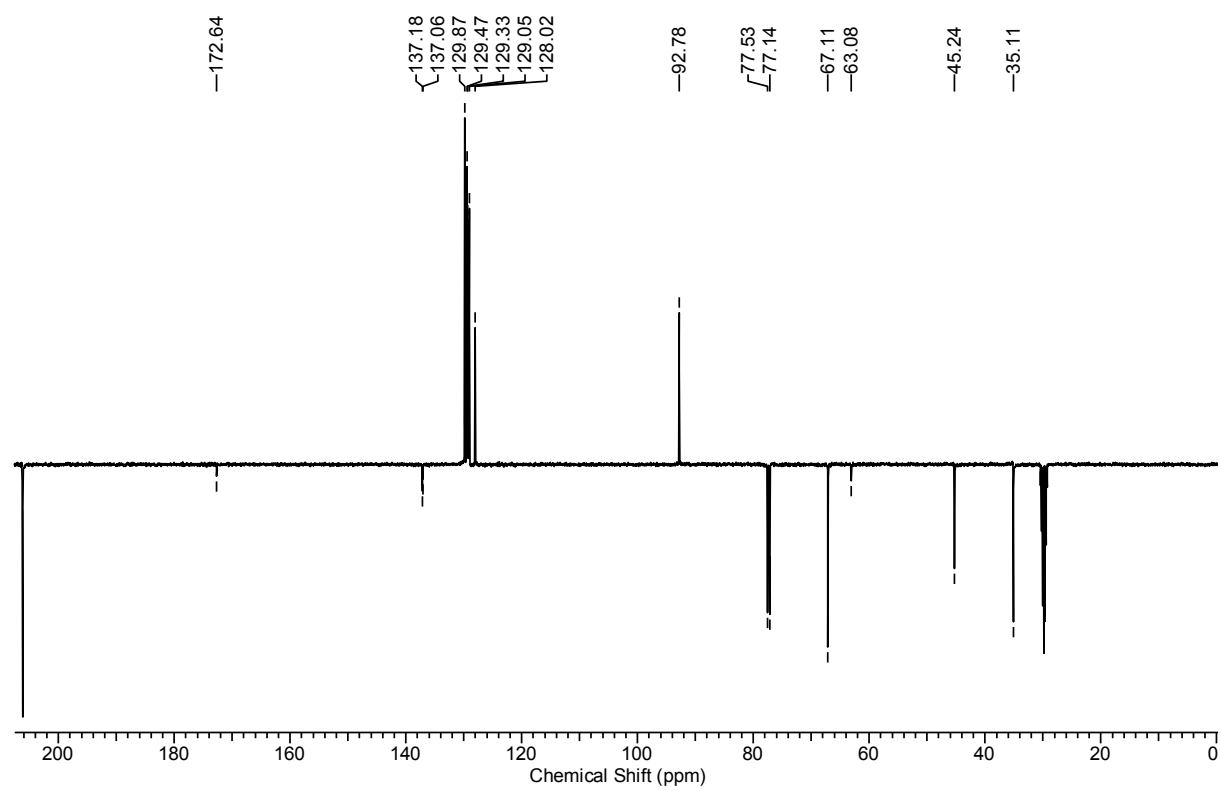

**<sup>1</sup>H NMR****Compound 4d**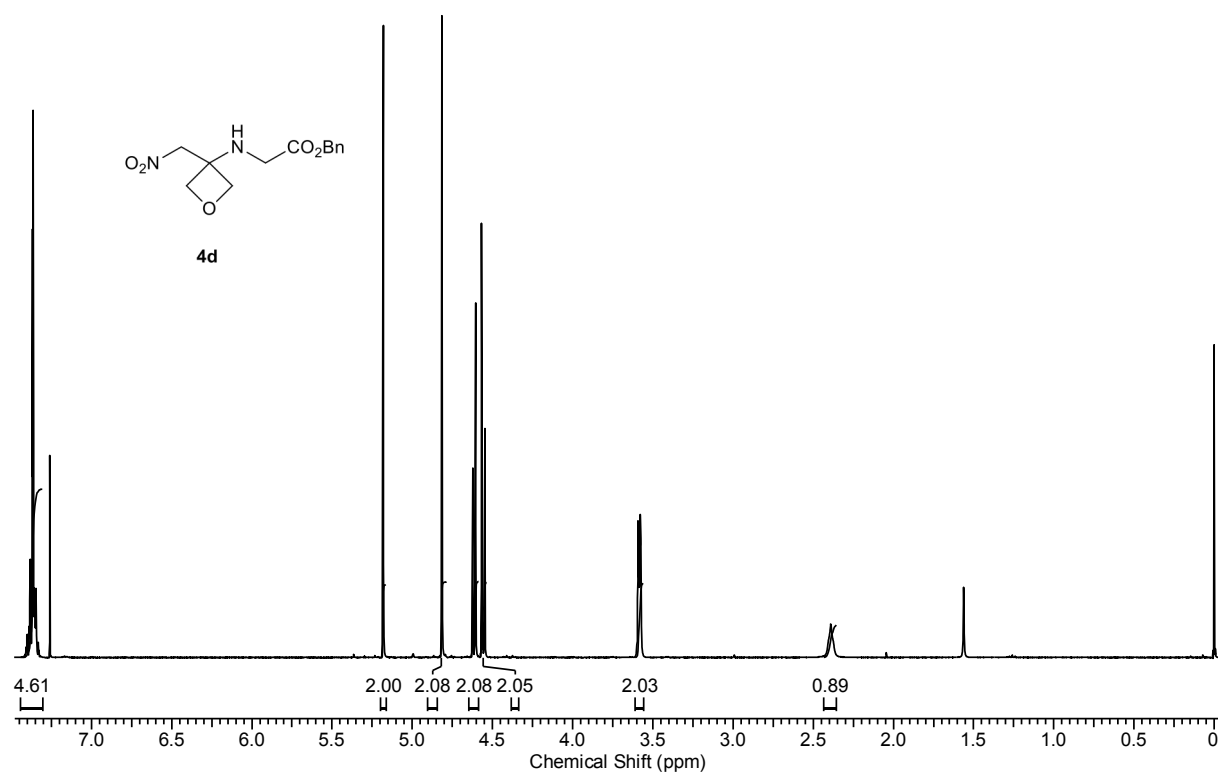**<sup>13</sup>C NMR**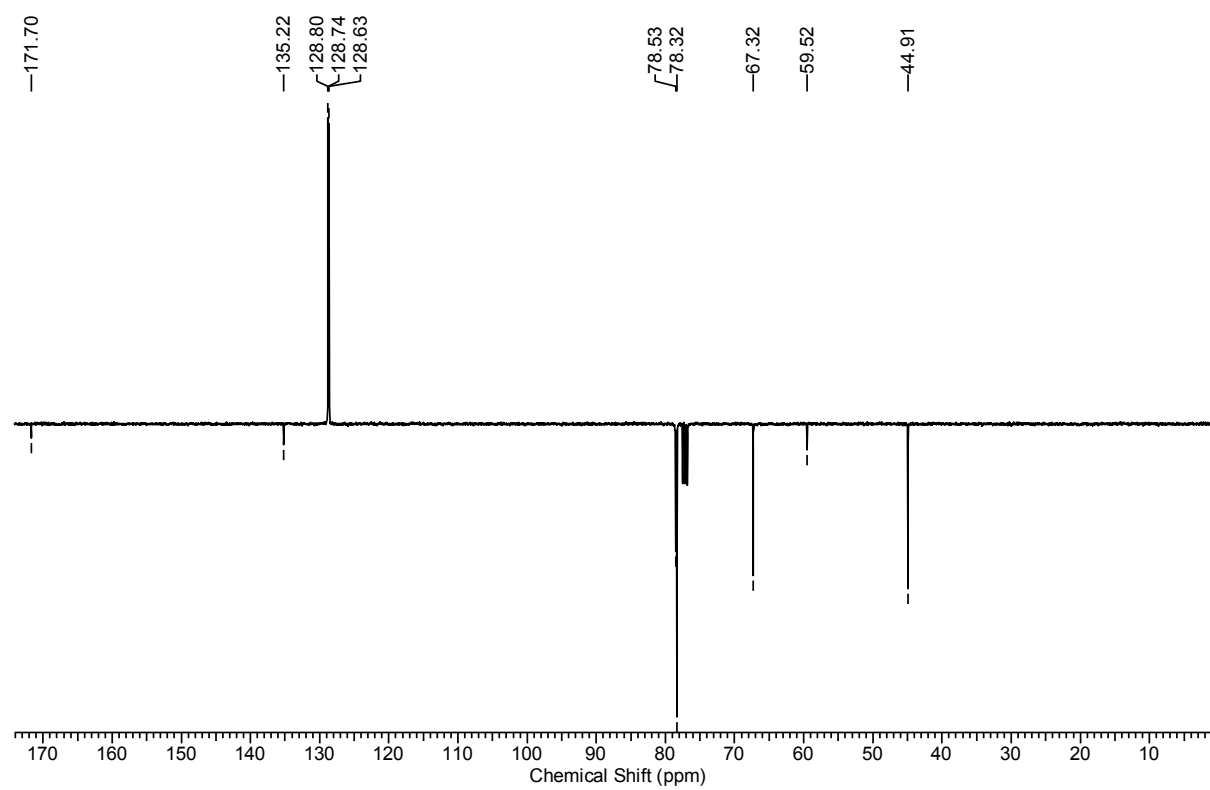

**<sup>1</sup>H NMR****Compound 4e**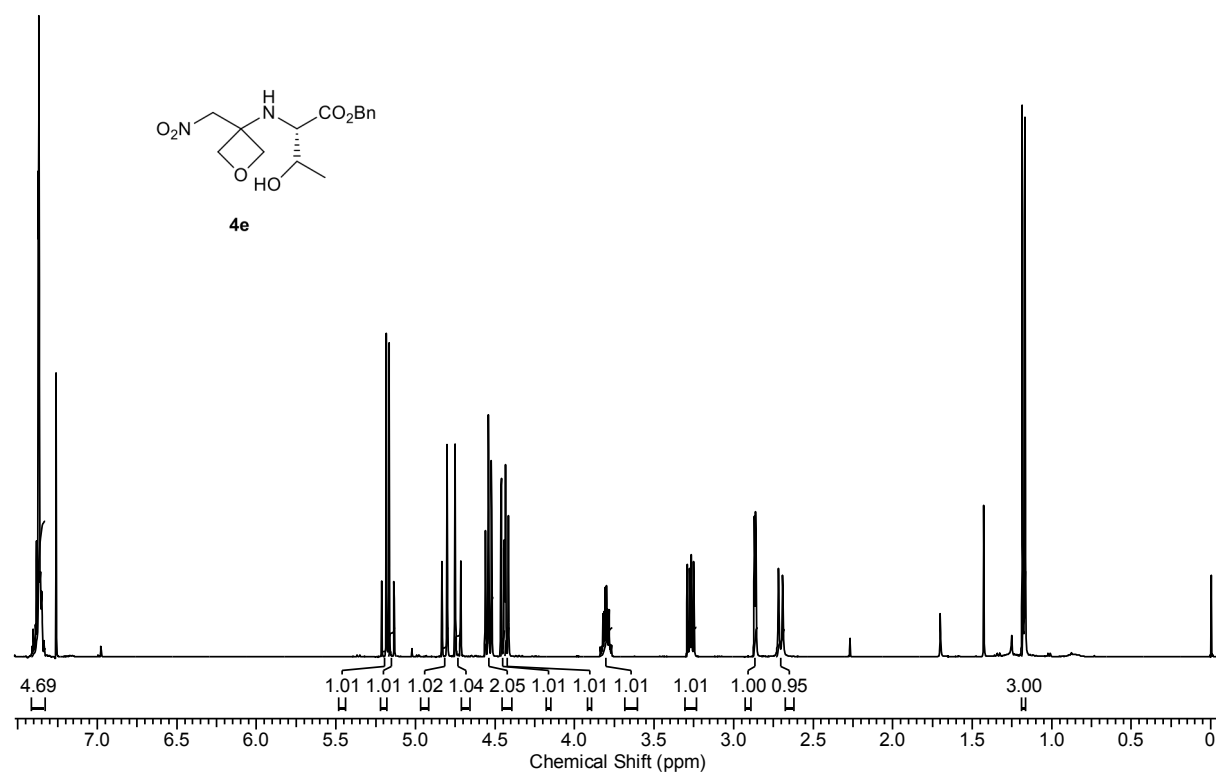**<sup>13</sup>C NMR**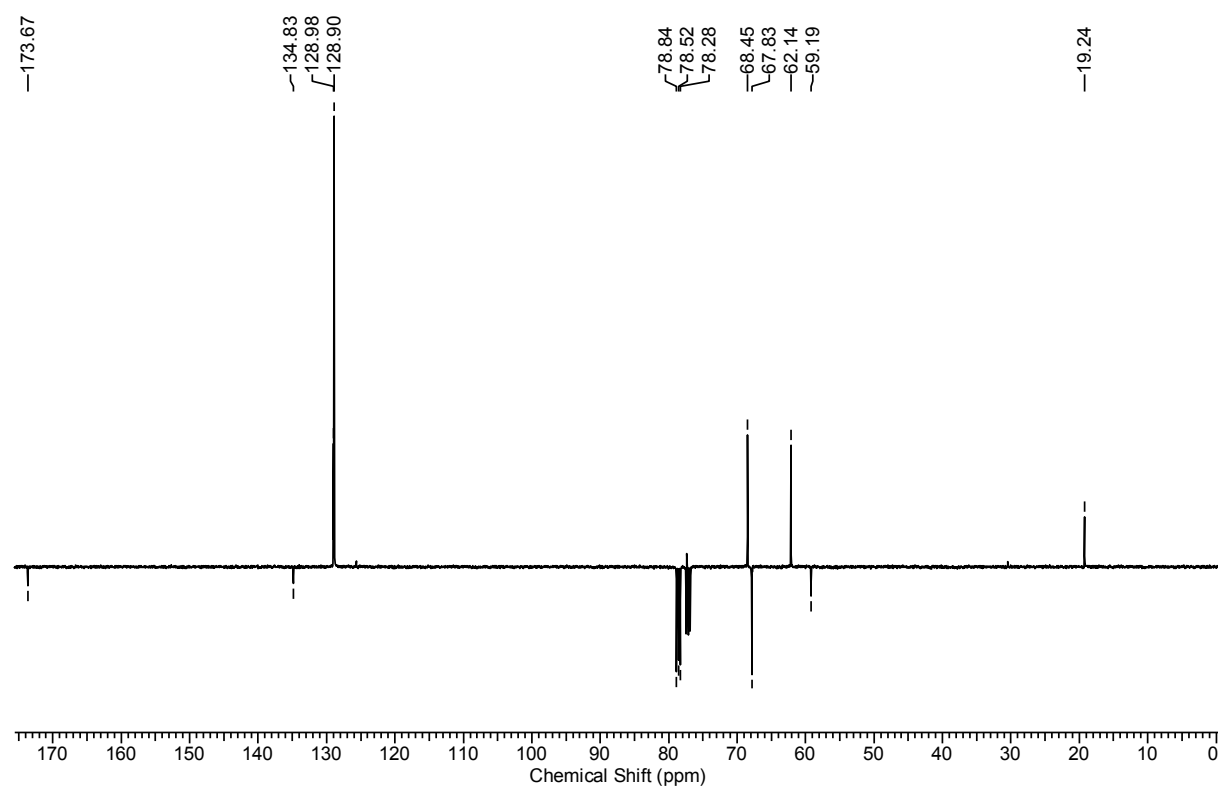



**$^1\text{H}$  NMR****Compound 4f**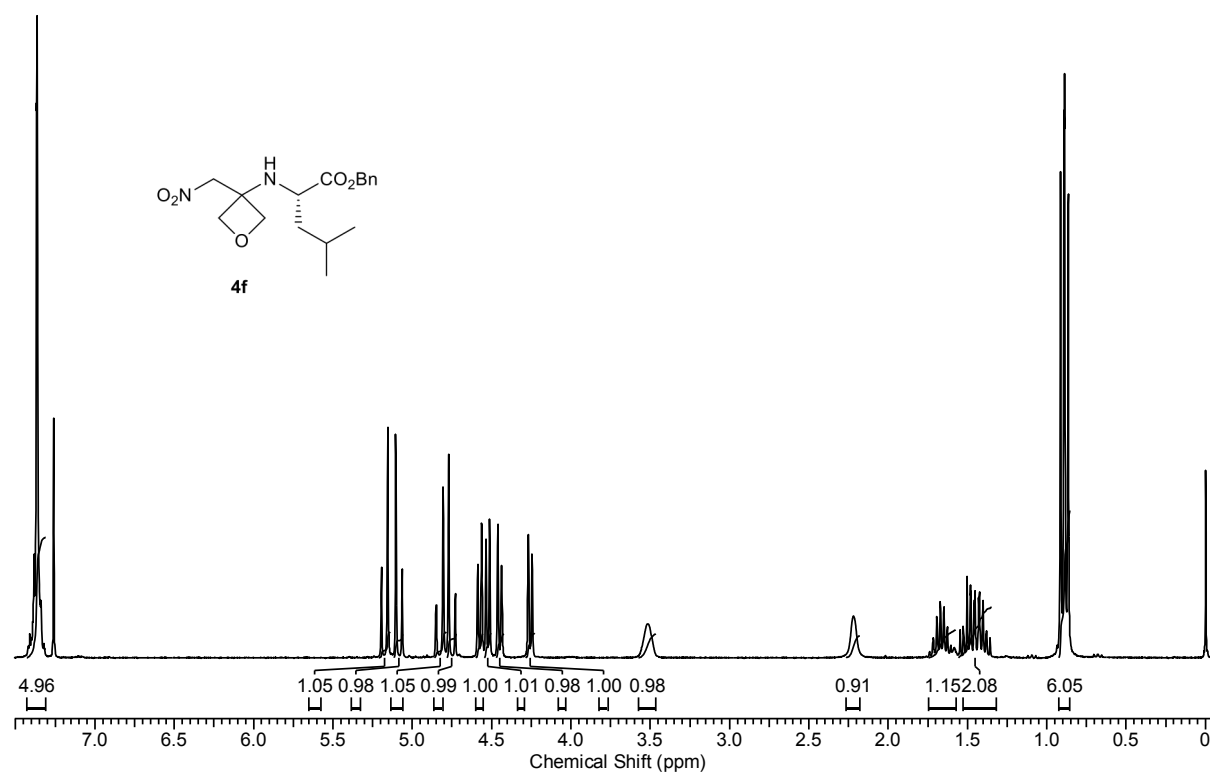 **$^{13}\text{C}$  NMR**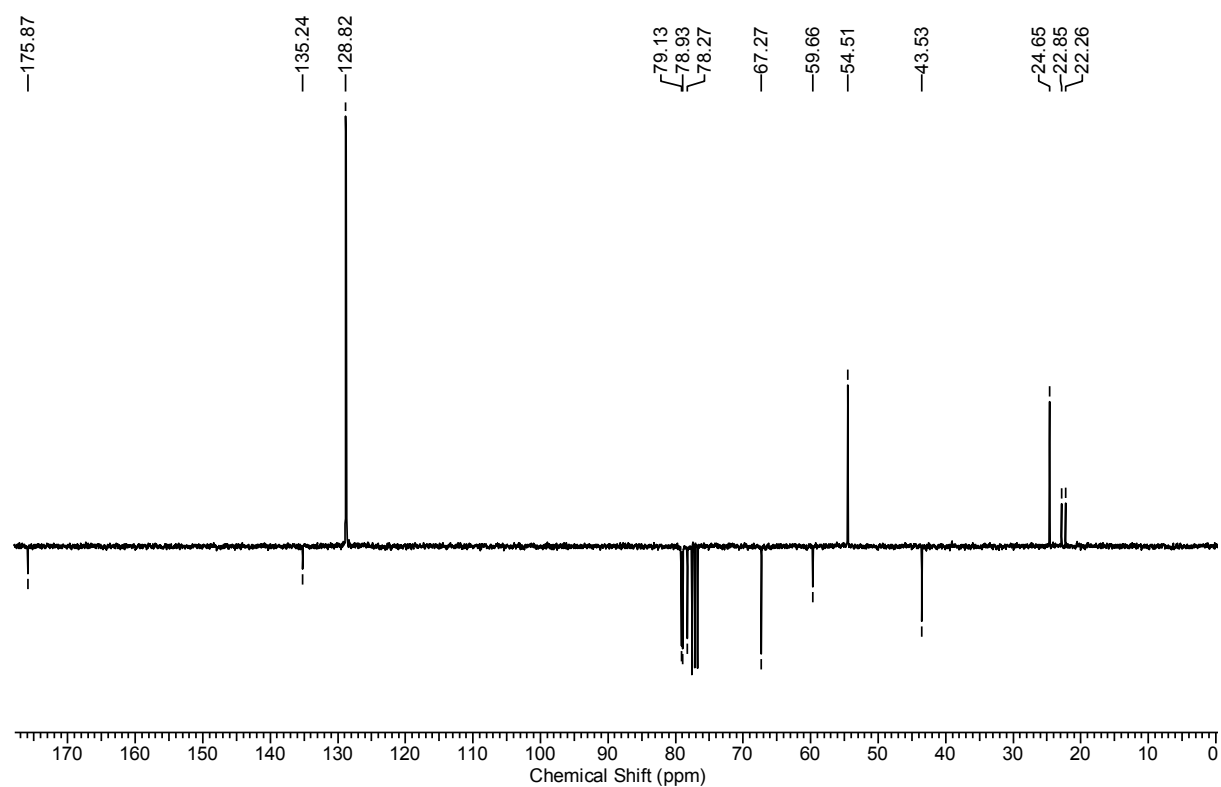

**<sup>1</sup>H NMR****Compound 4g**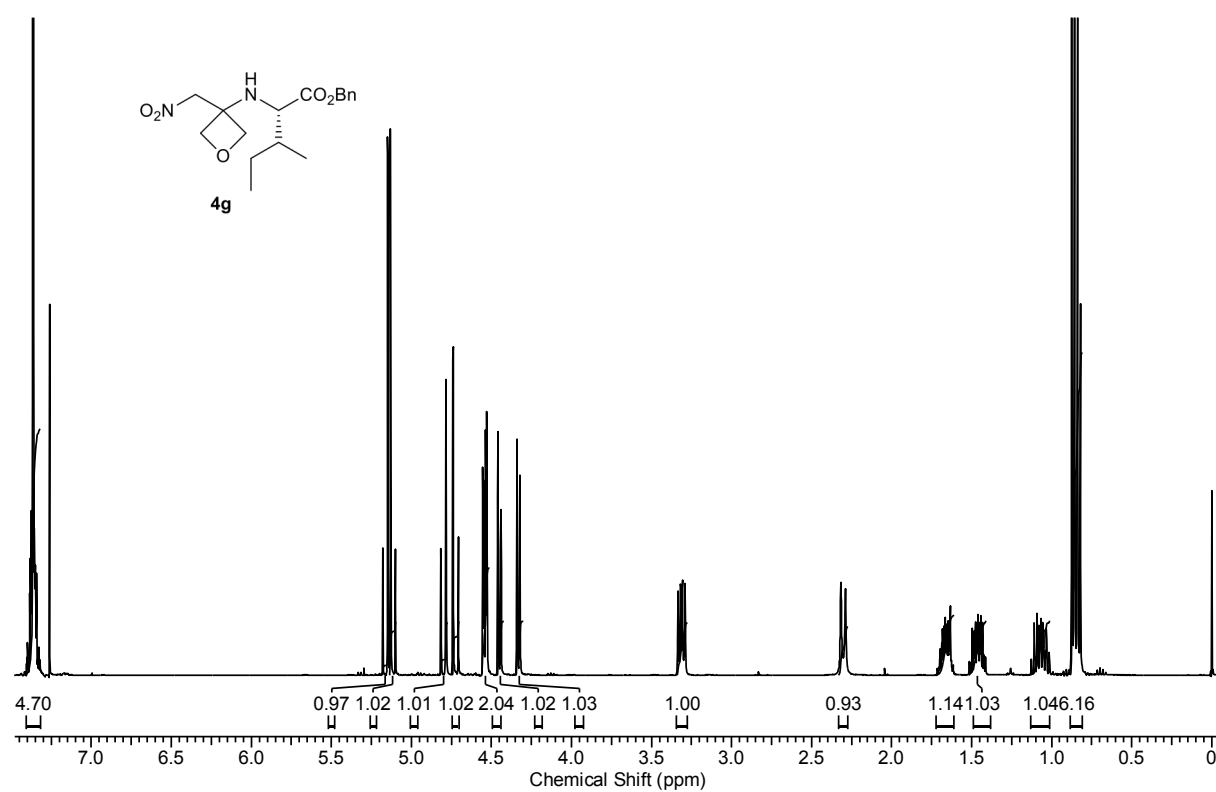**<sup>13</sup>C NMR**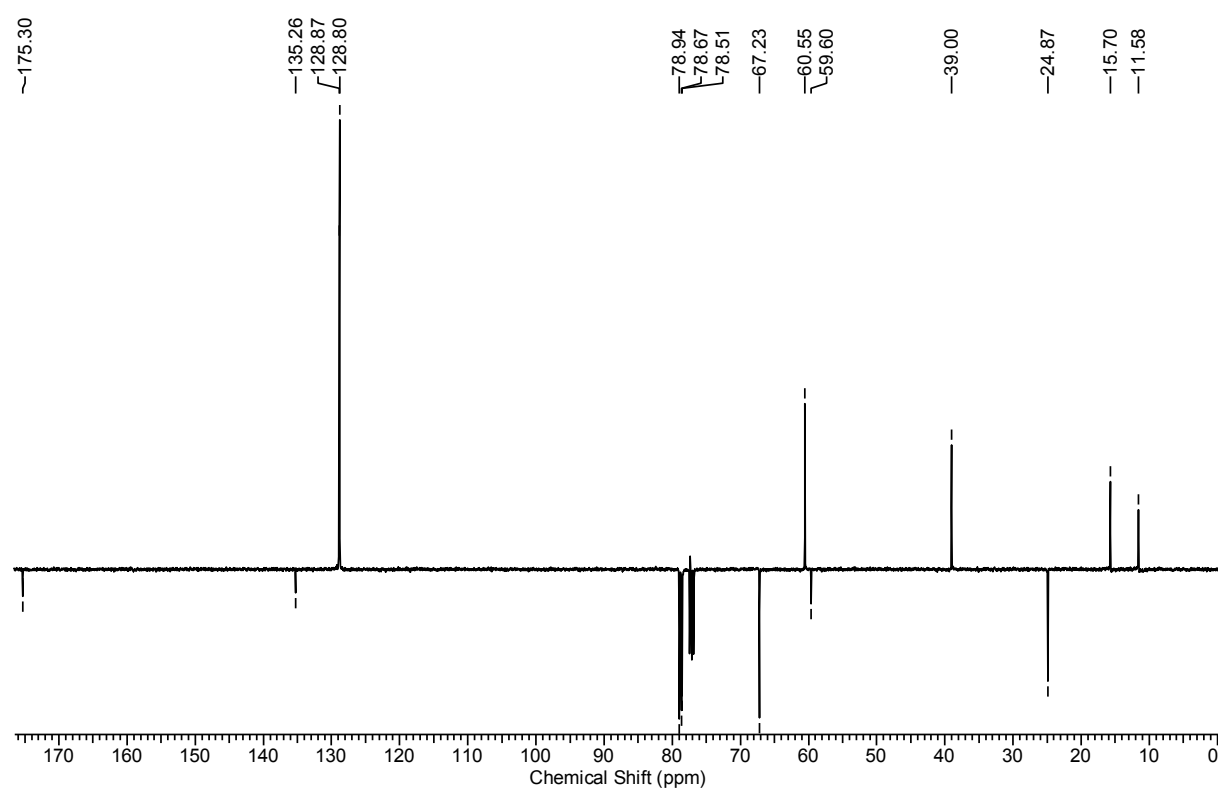

**<sup>1</sup>H NMR****Compound 4h**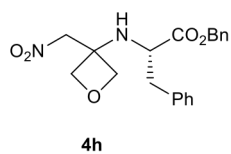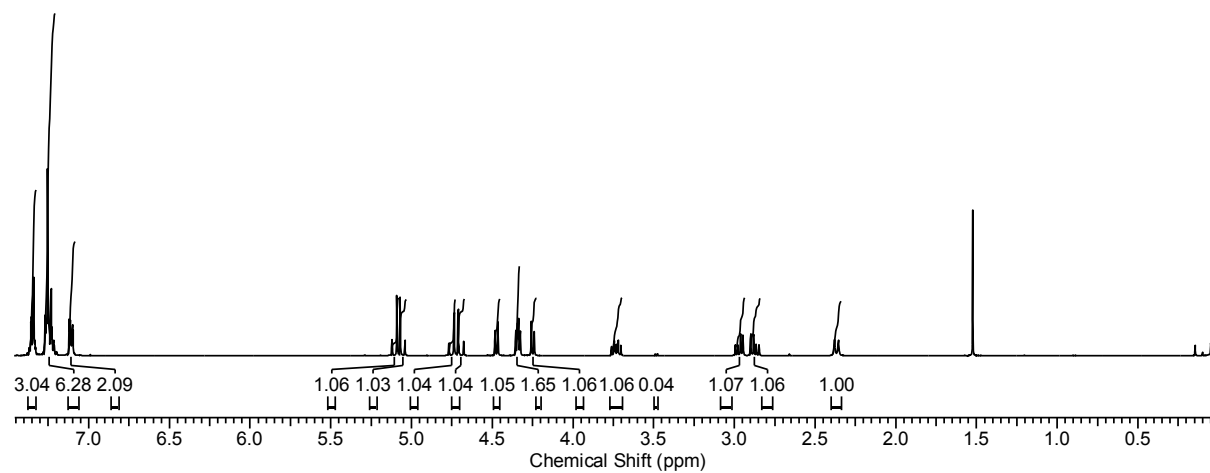**<sup>13</sup>C NMR**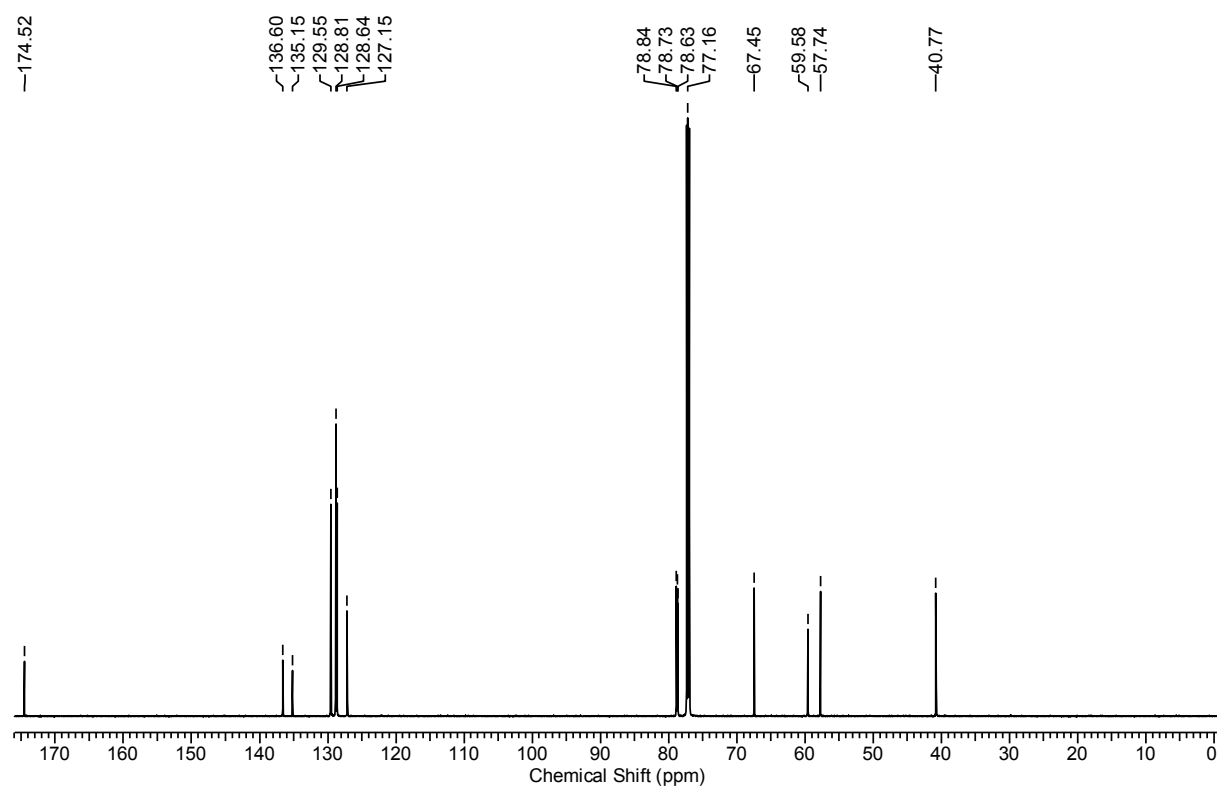

**<sup>1</sup>H NMR****Compound 4i**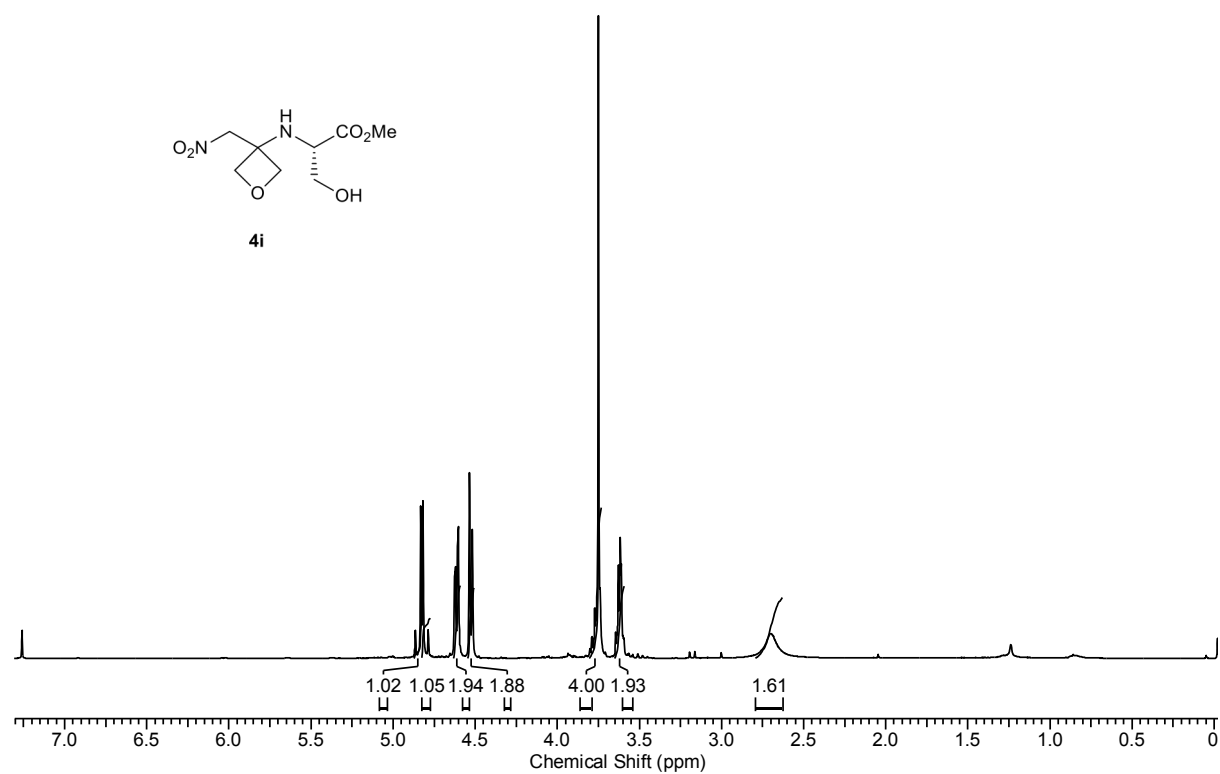**<sup>13</sup>C NMR**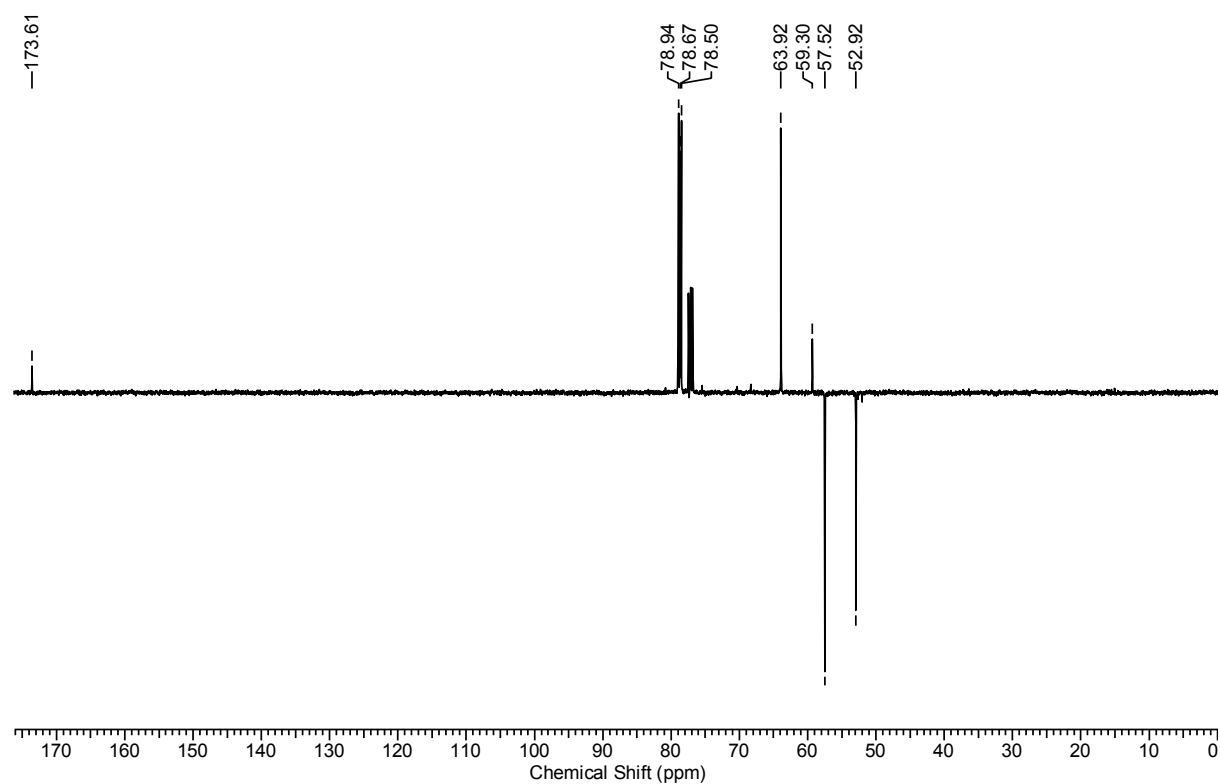

**<sup>1</sup>H NMR****Compound 4j**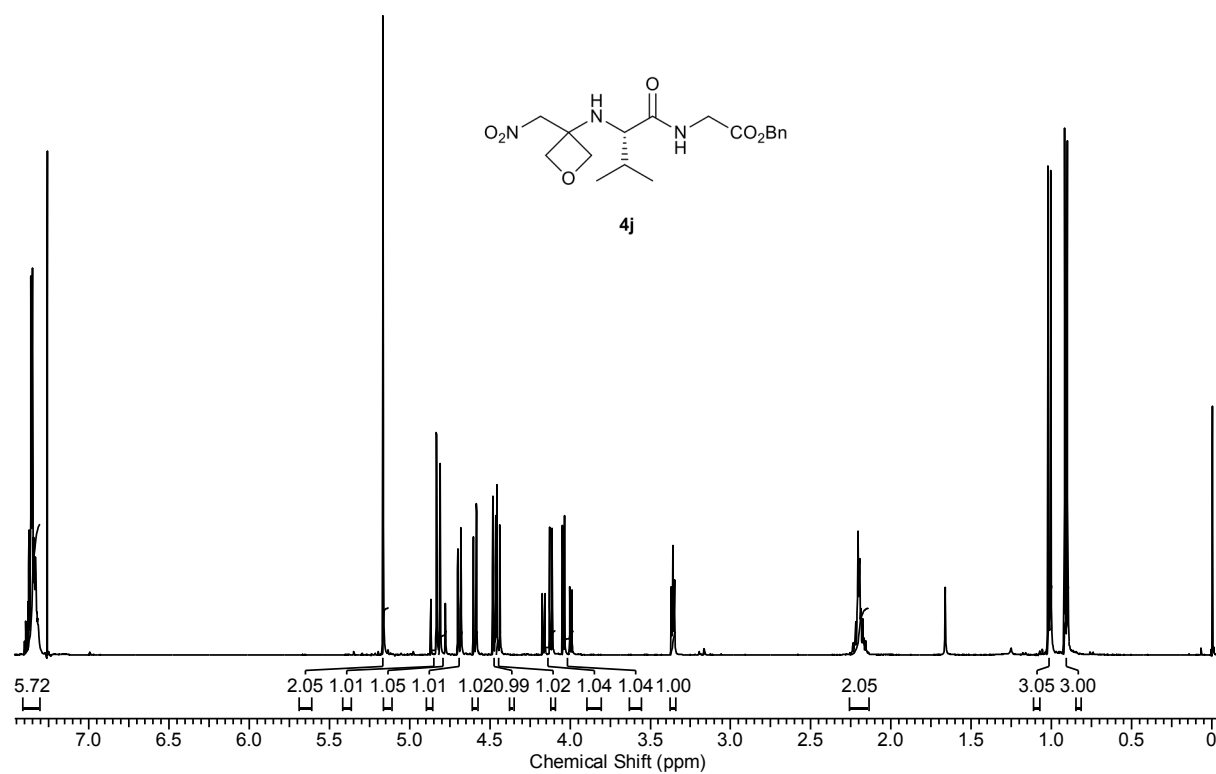**<sup>13</sup>C NMR**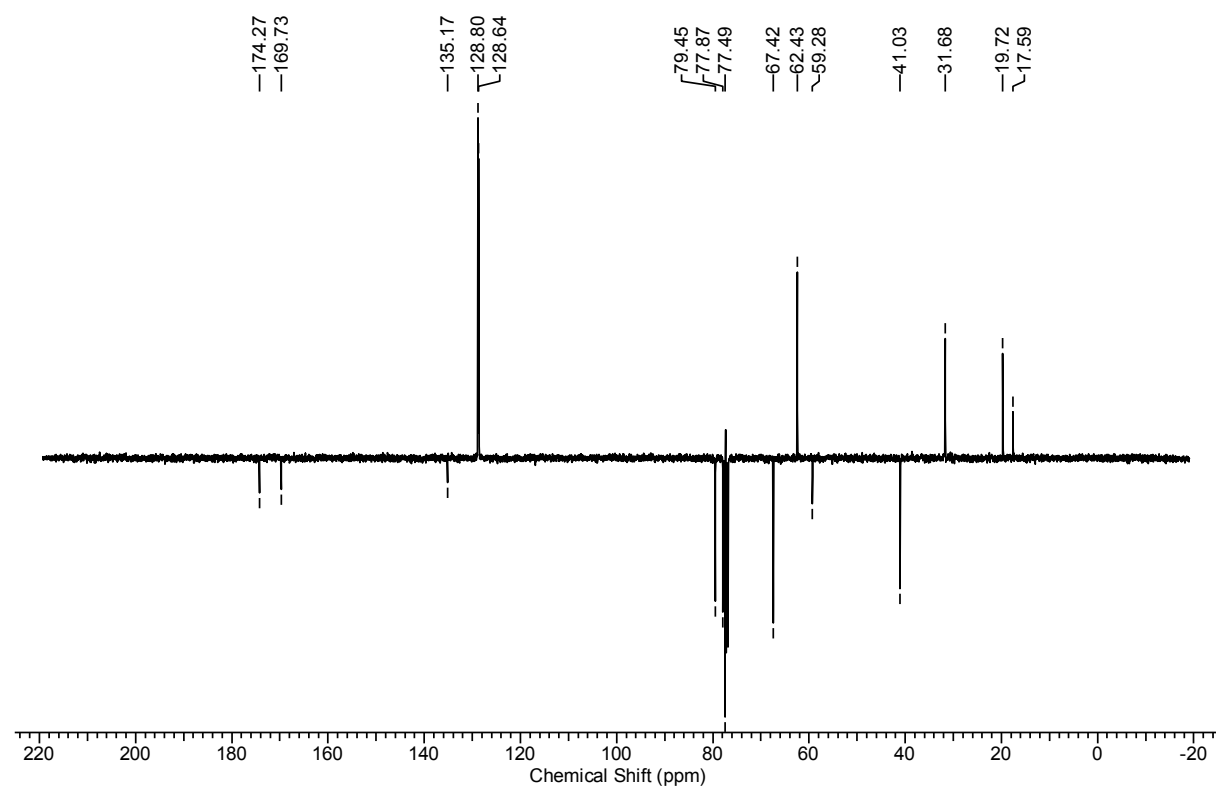

**$^1\text{H}$  NMR****Compound 4k**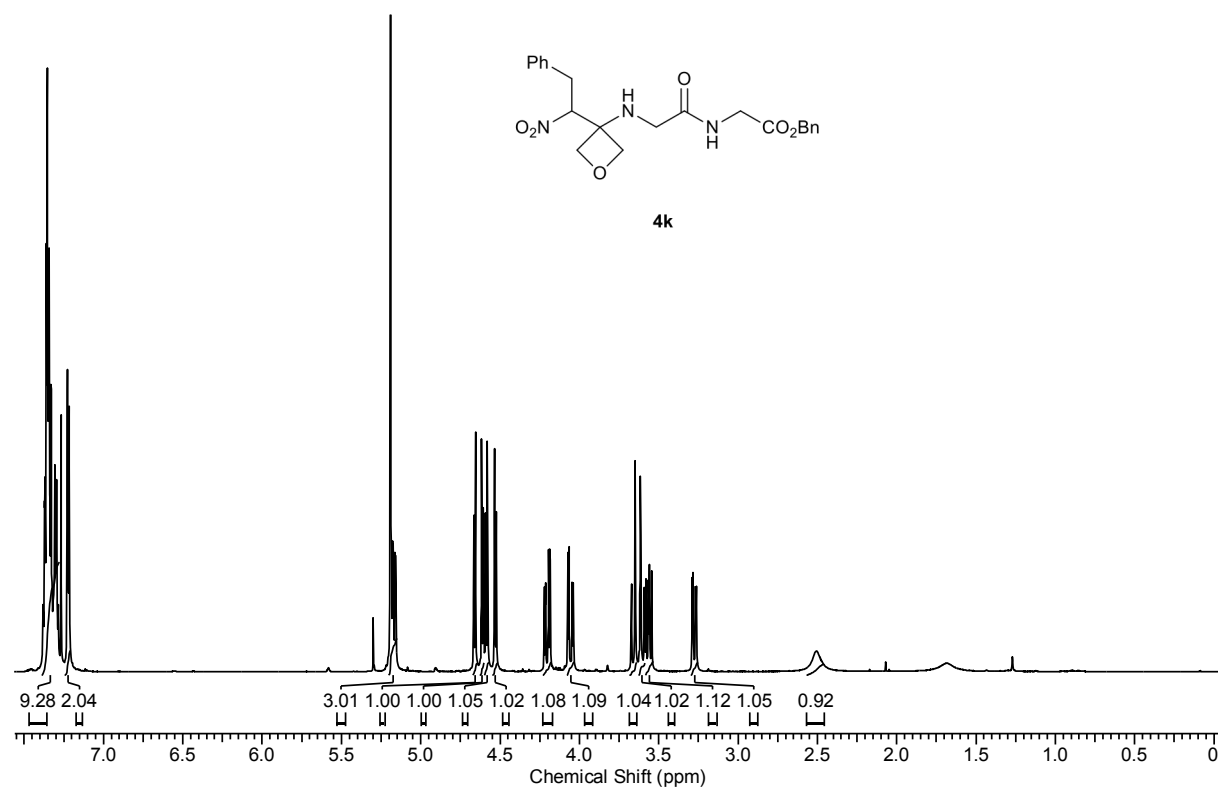 **$^{13}\text{C}$  NMR**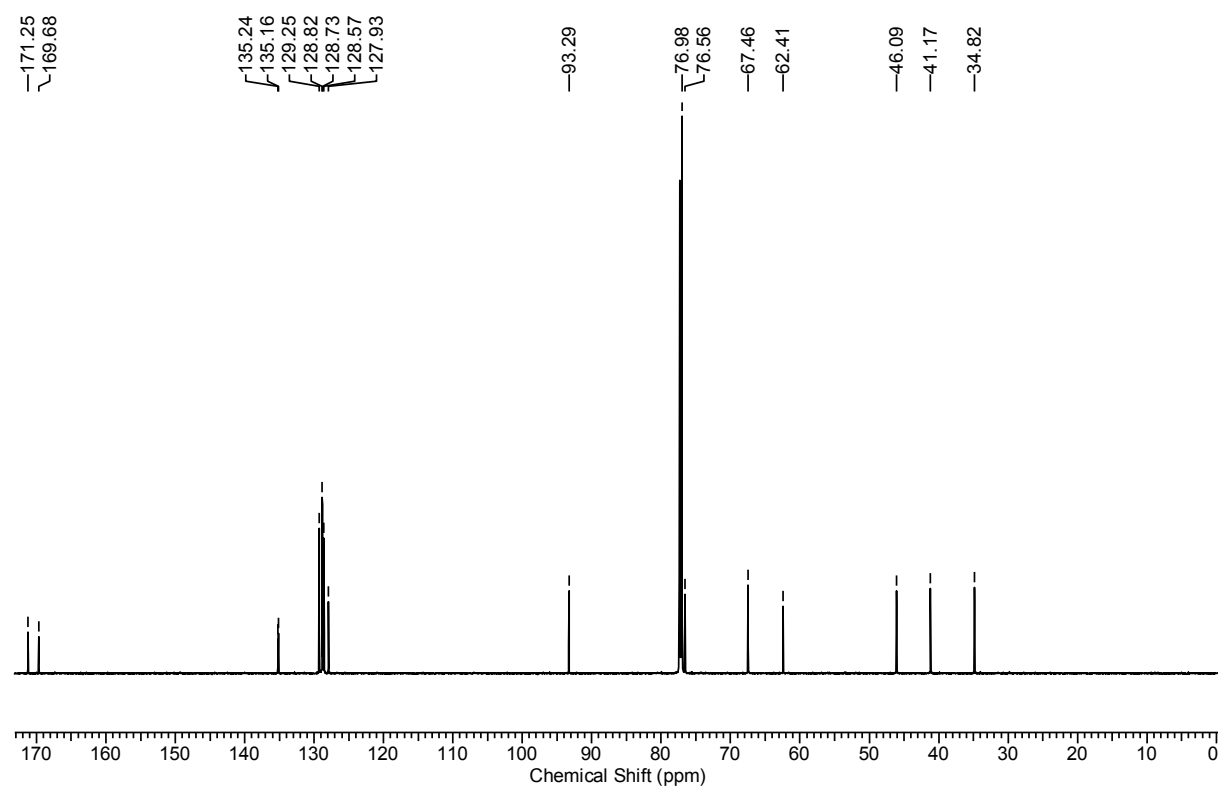

**<sup>1</sup>H NMR****Compound 1a**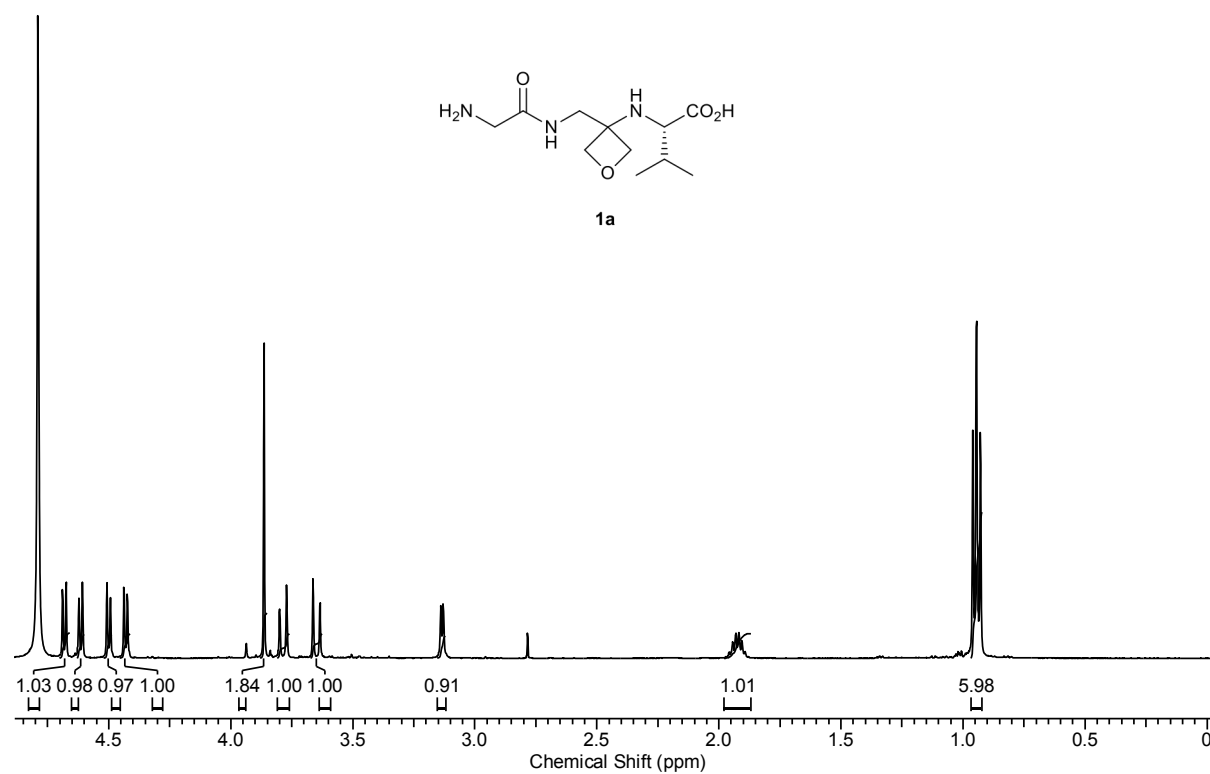**<sup>13</sup>C NMR**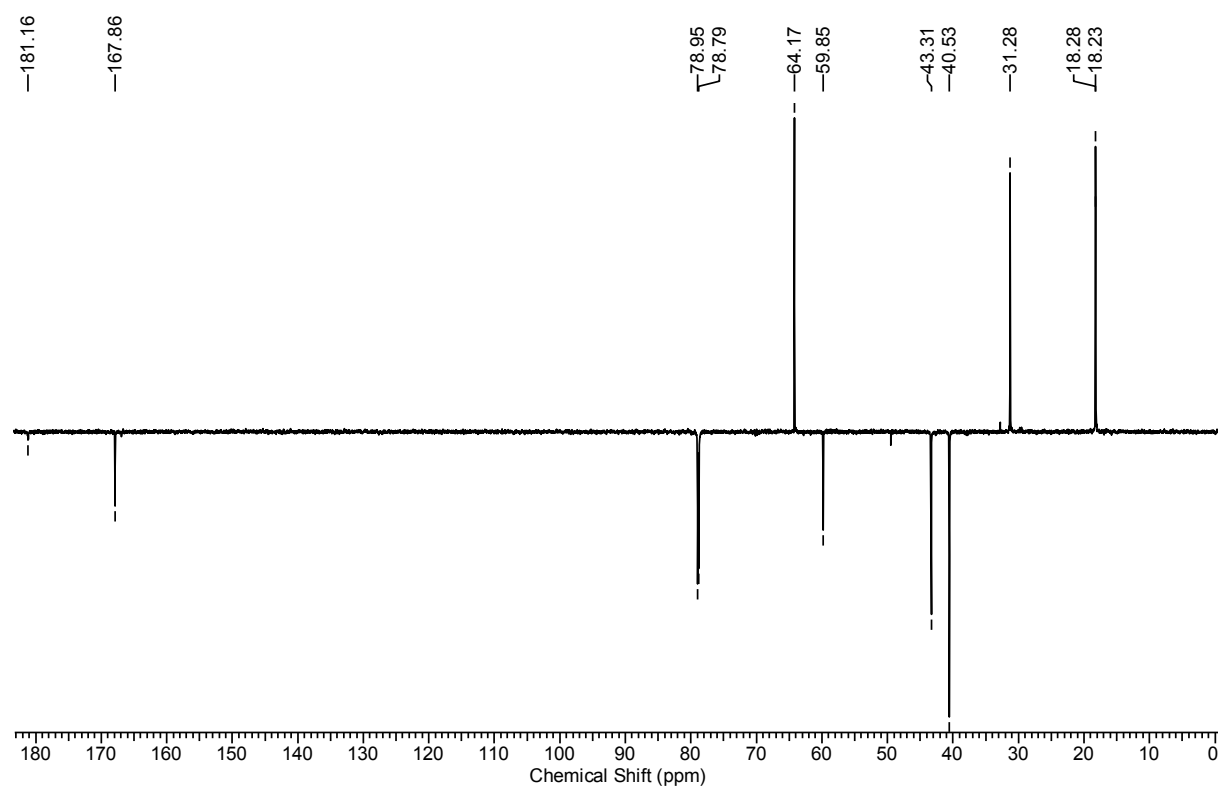

**<sup>1</sup>H NMR****Compound 1b**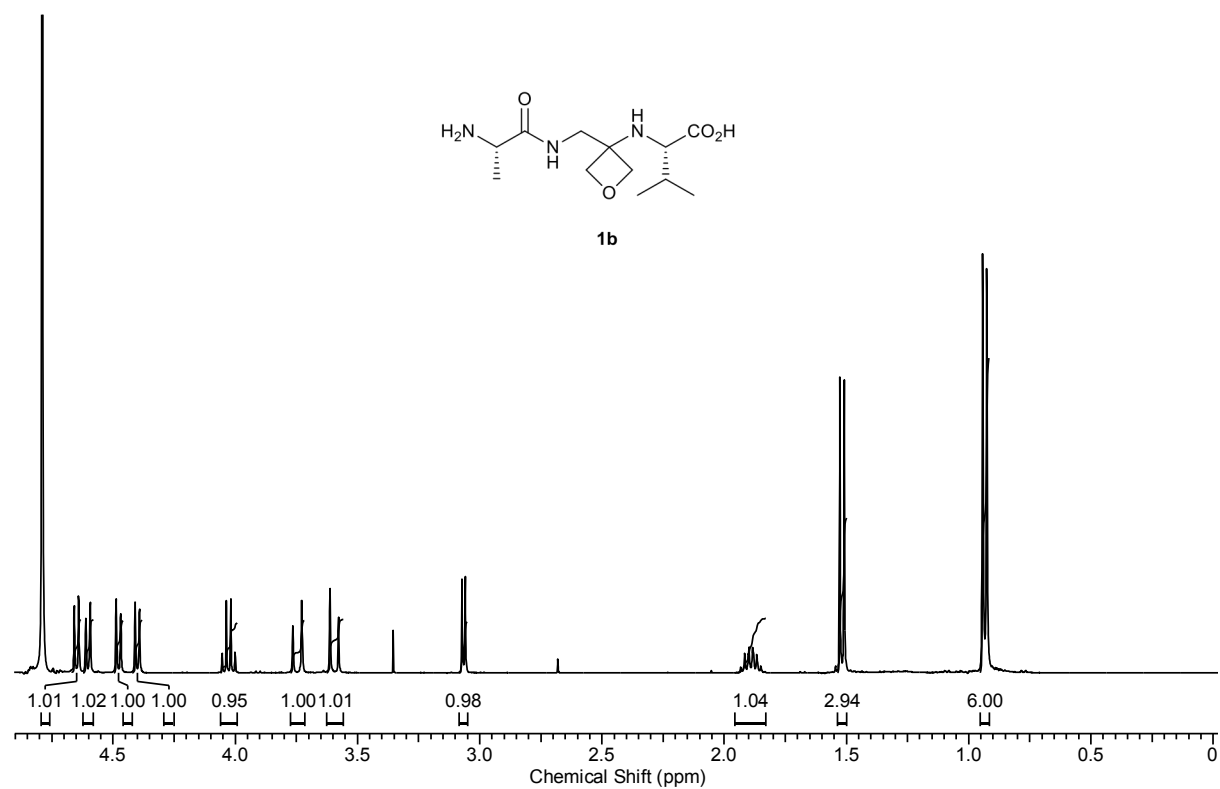**<sup>13</sup>C NMR**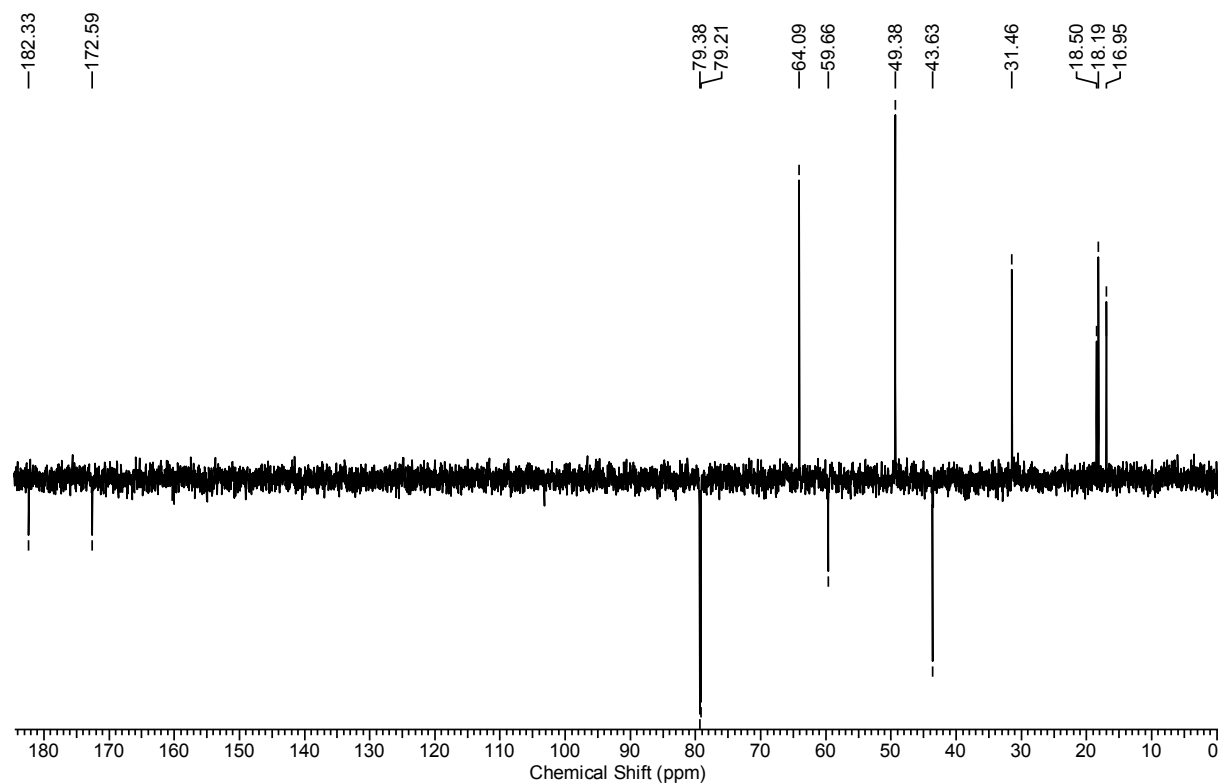



**<sup>1</sup>H NMR****Compound 1c**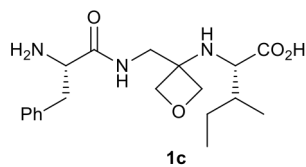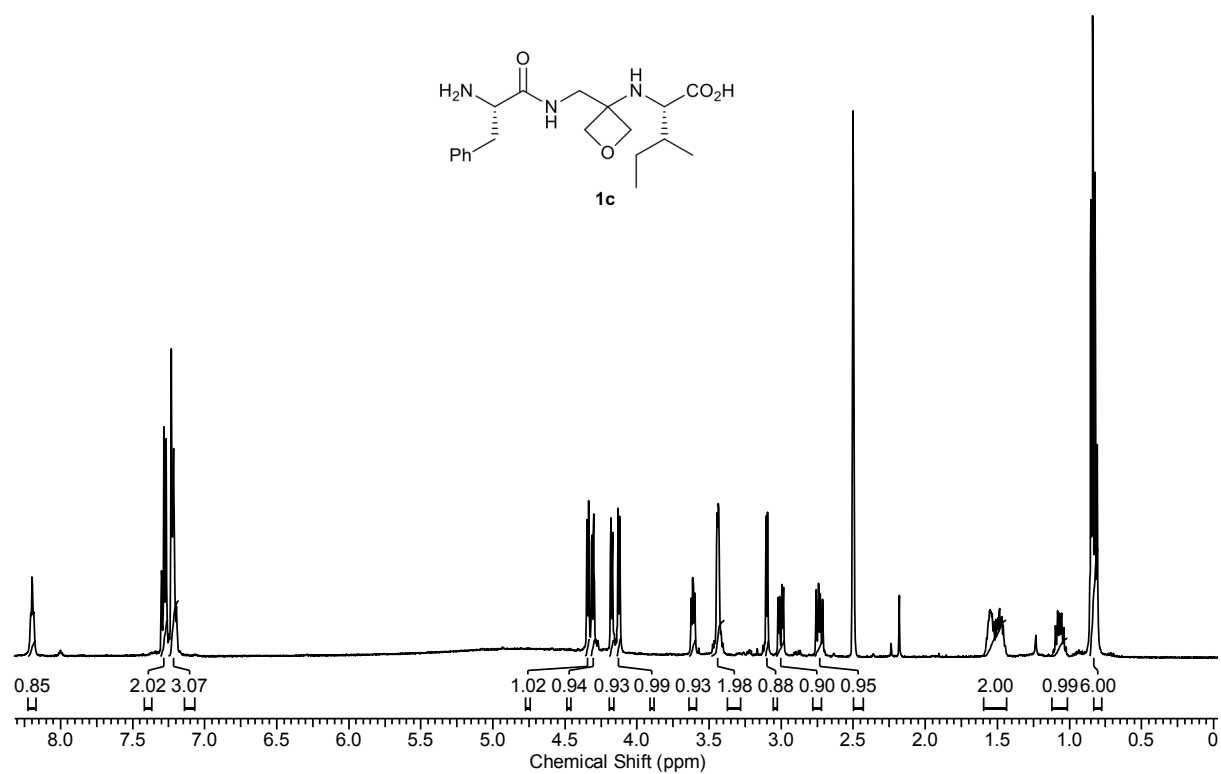**<sup>13</sup>C NMR**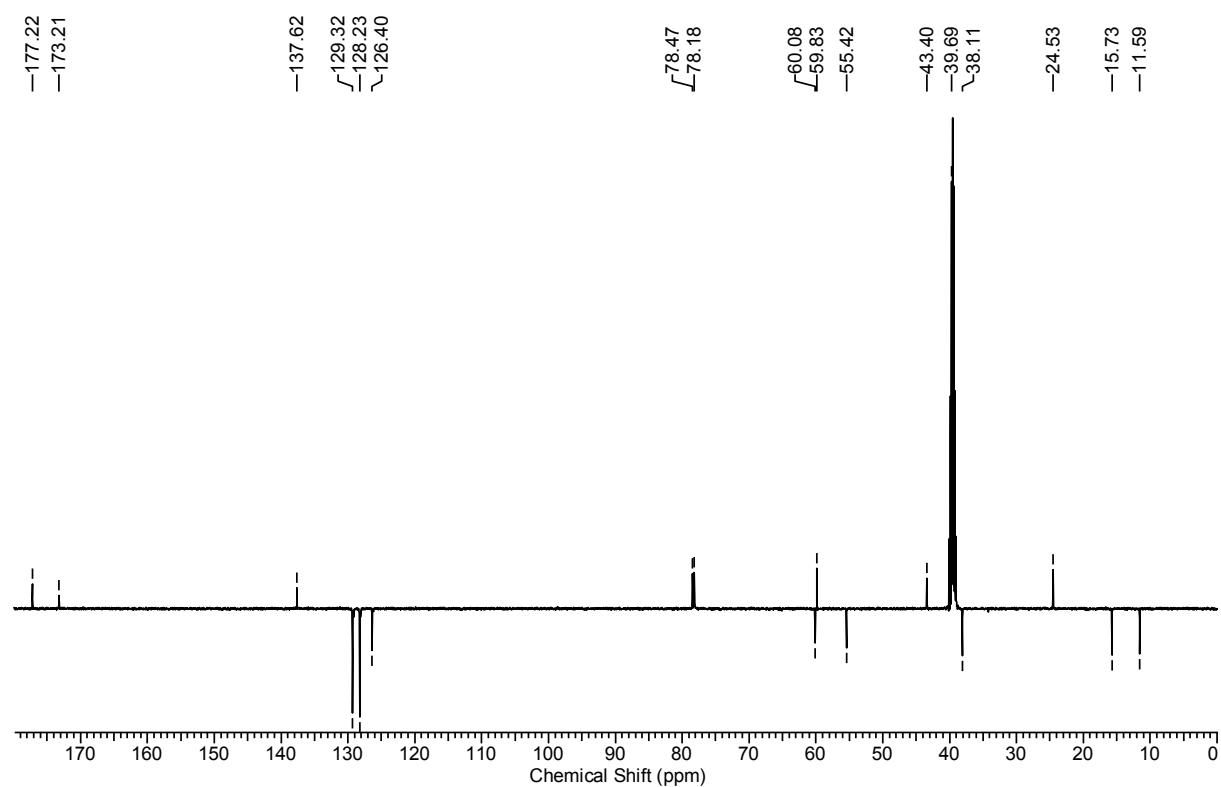

**<sup>1</sup>H NMR****Compound 1d**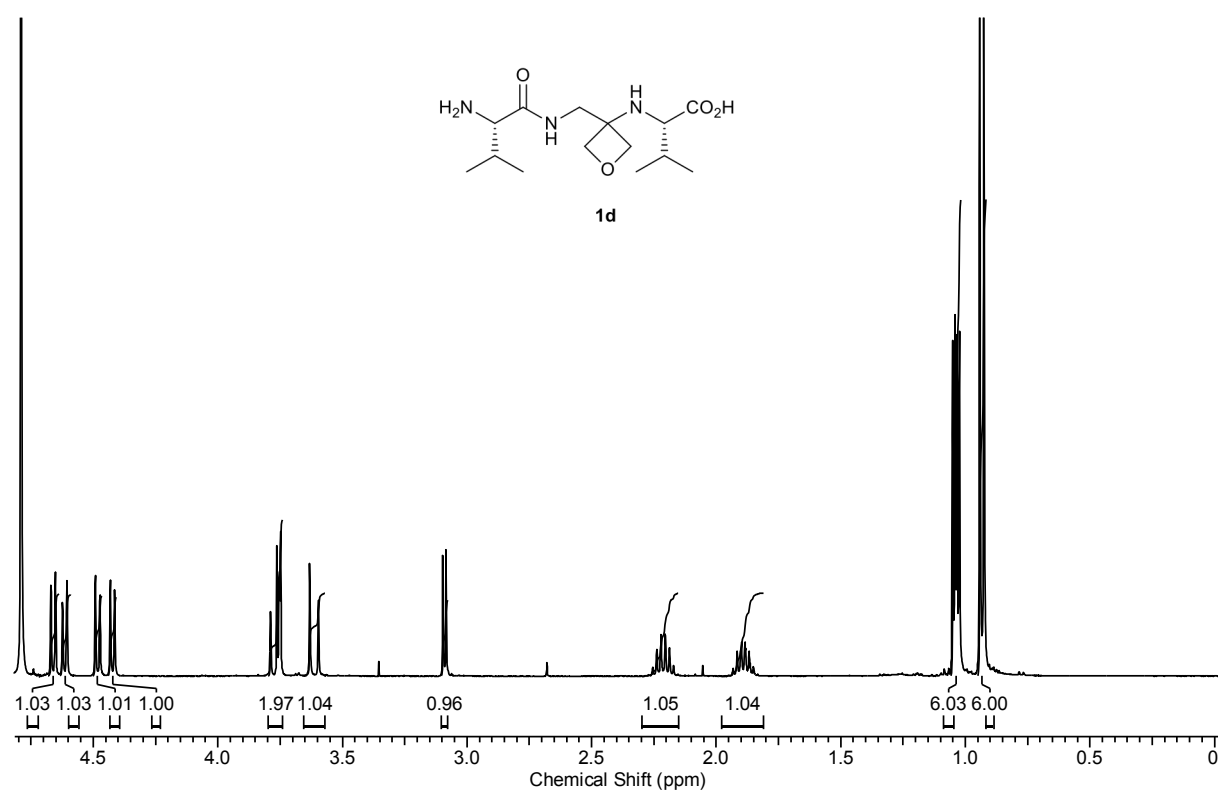**<sup>13</sup>C NMR**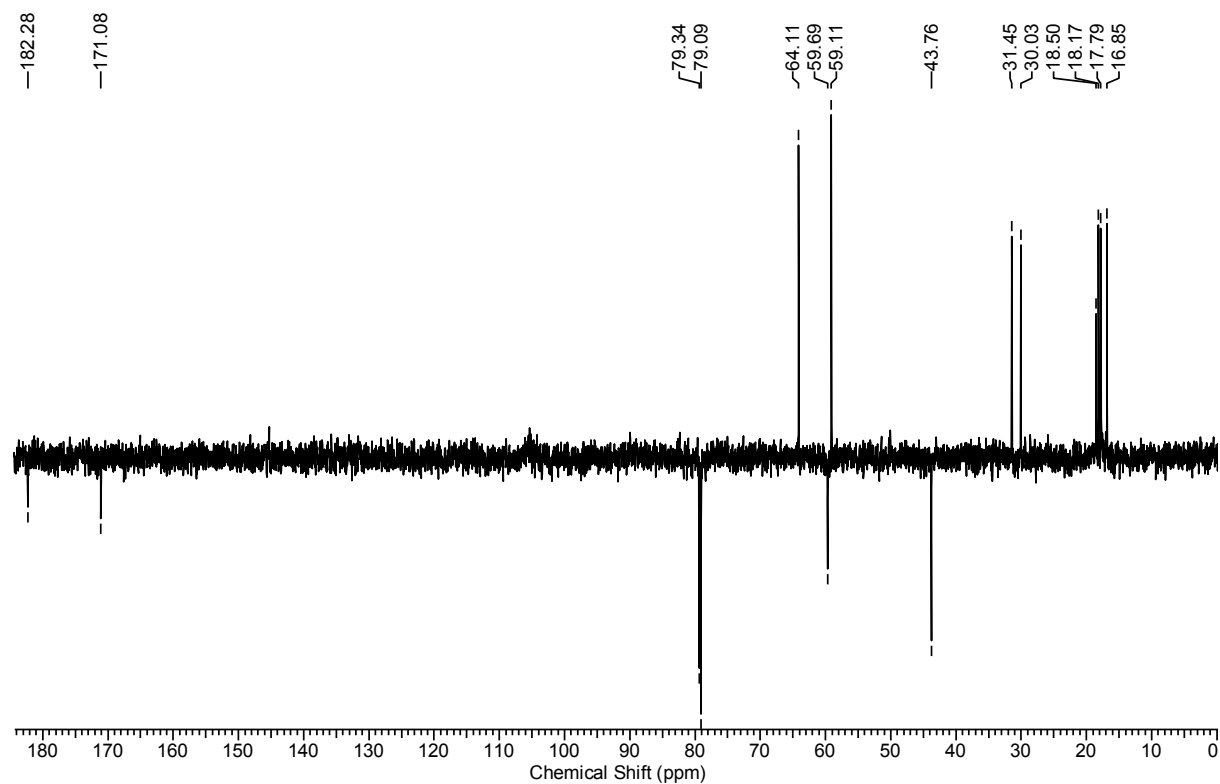

**<sup>1</sup>H NMR****Compound 1e**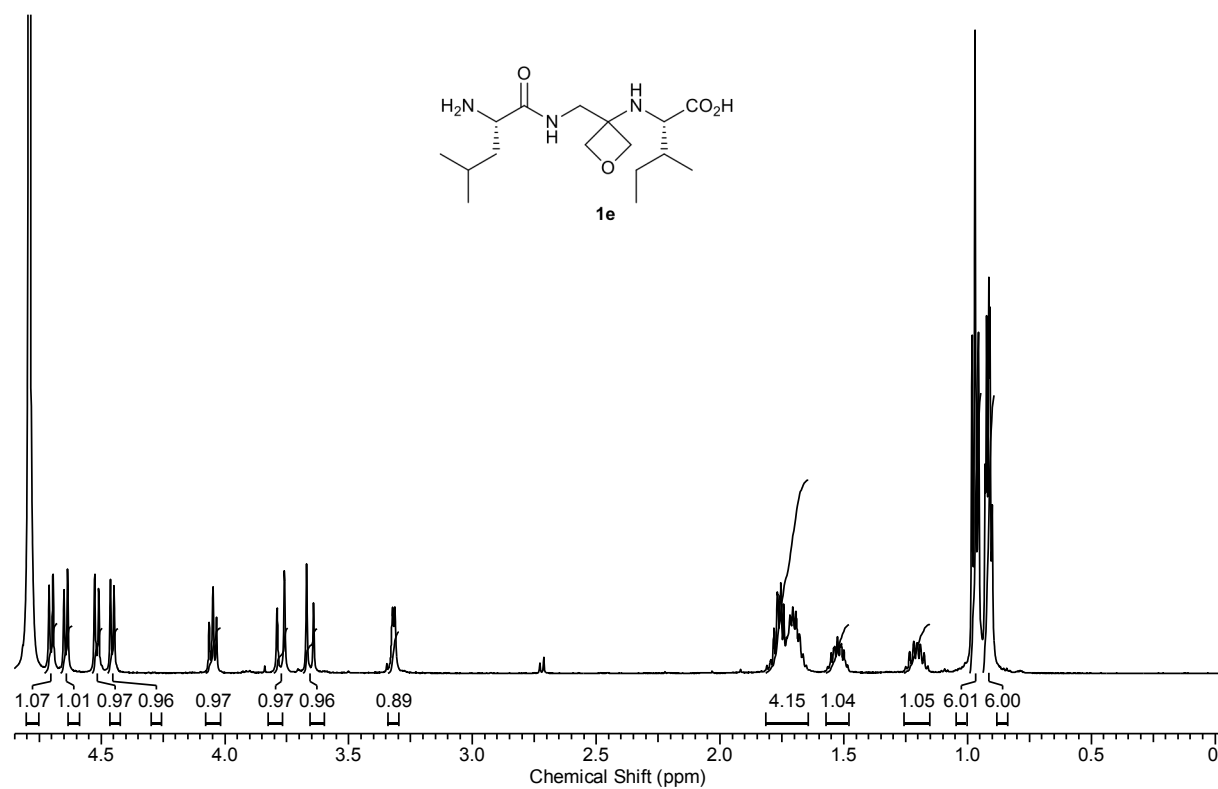**<sup>13</sup>C NMR**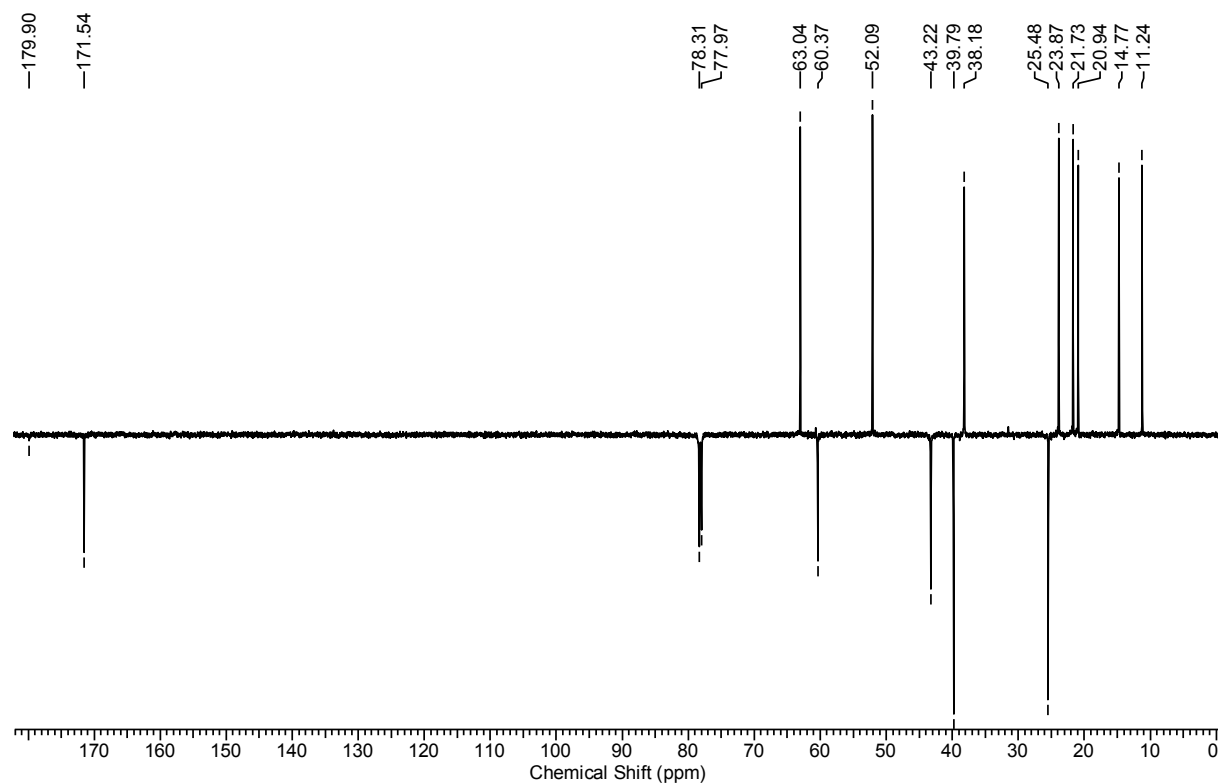

**<sup>1</sup>H NMR****Compound 1f**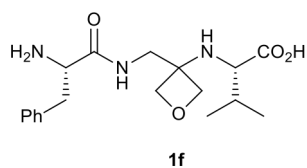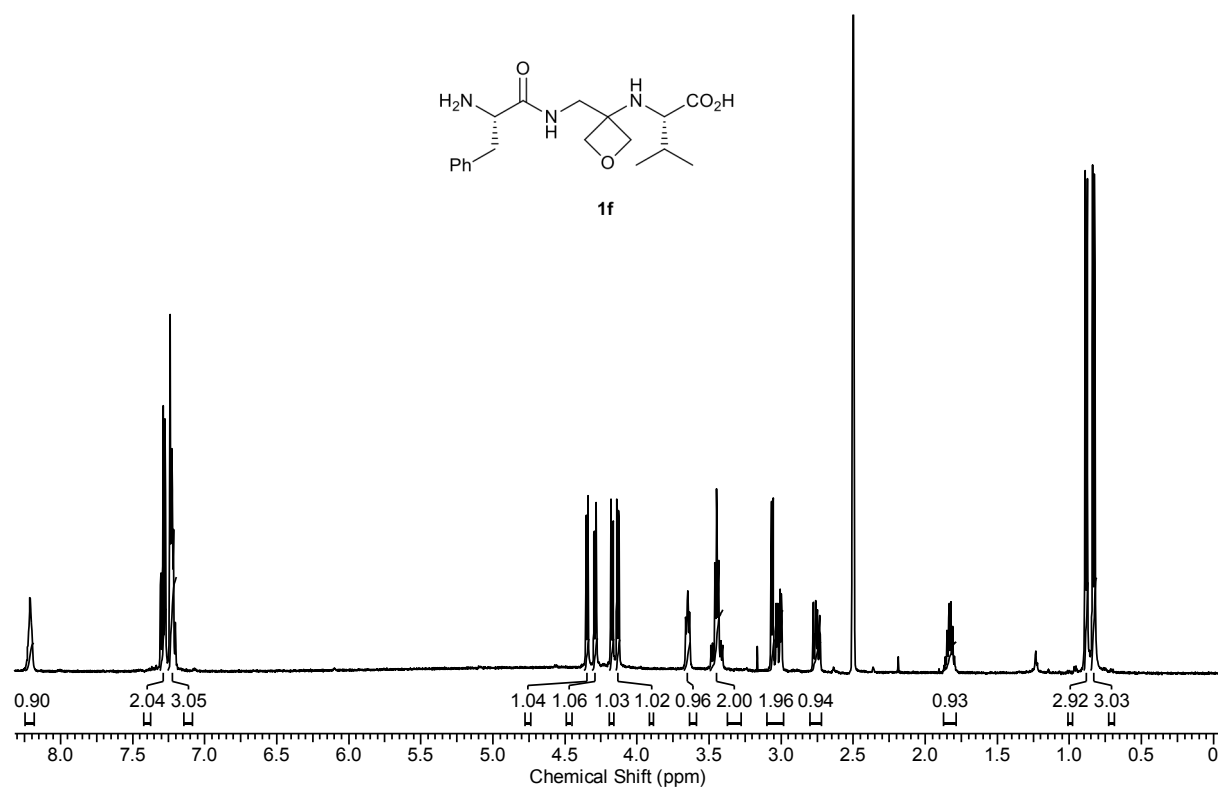**<sup>13</sup>C NMR**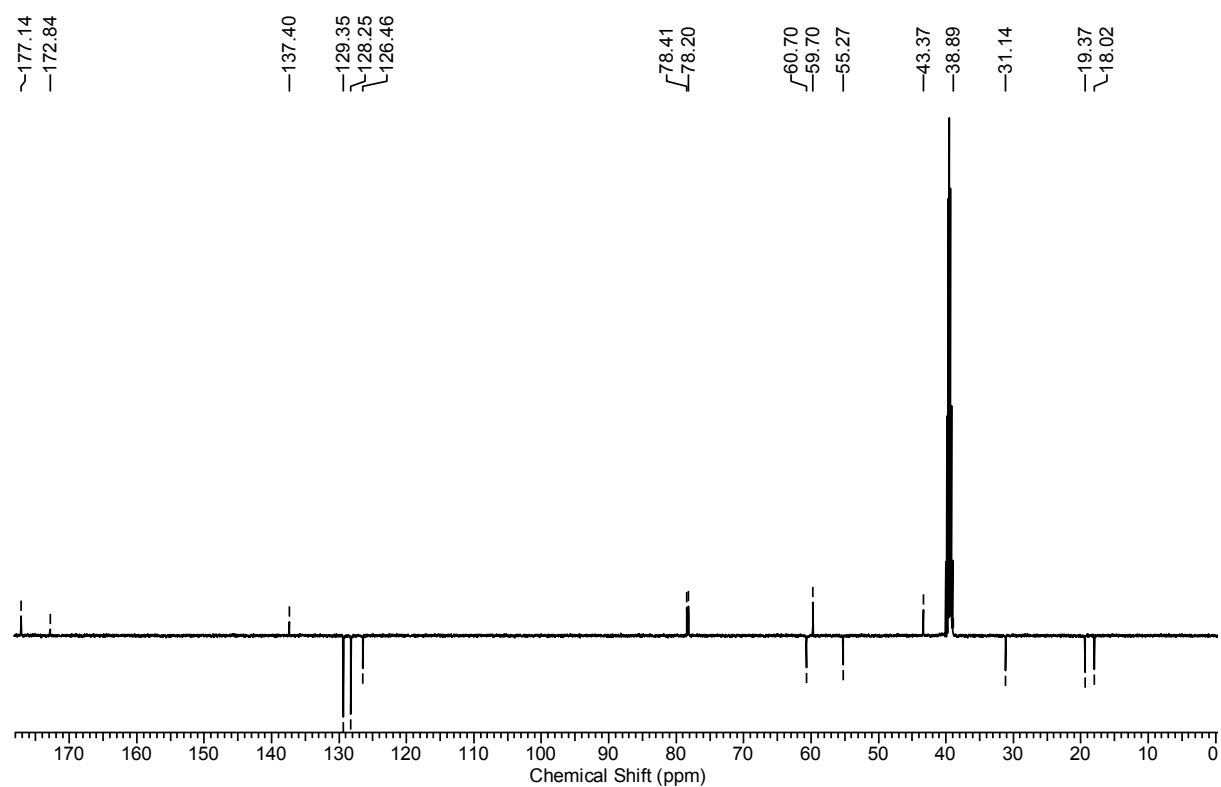

**<sup>1</sup>H NMR****Compound 7**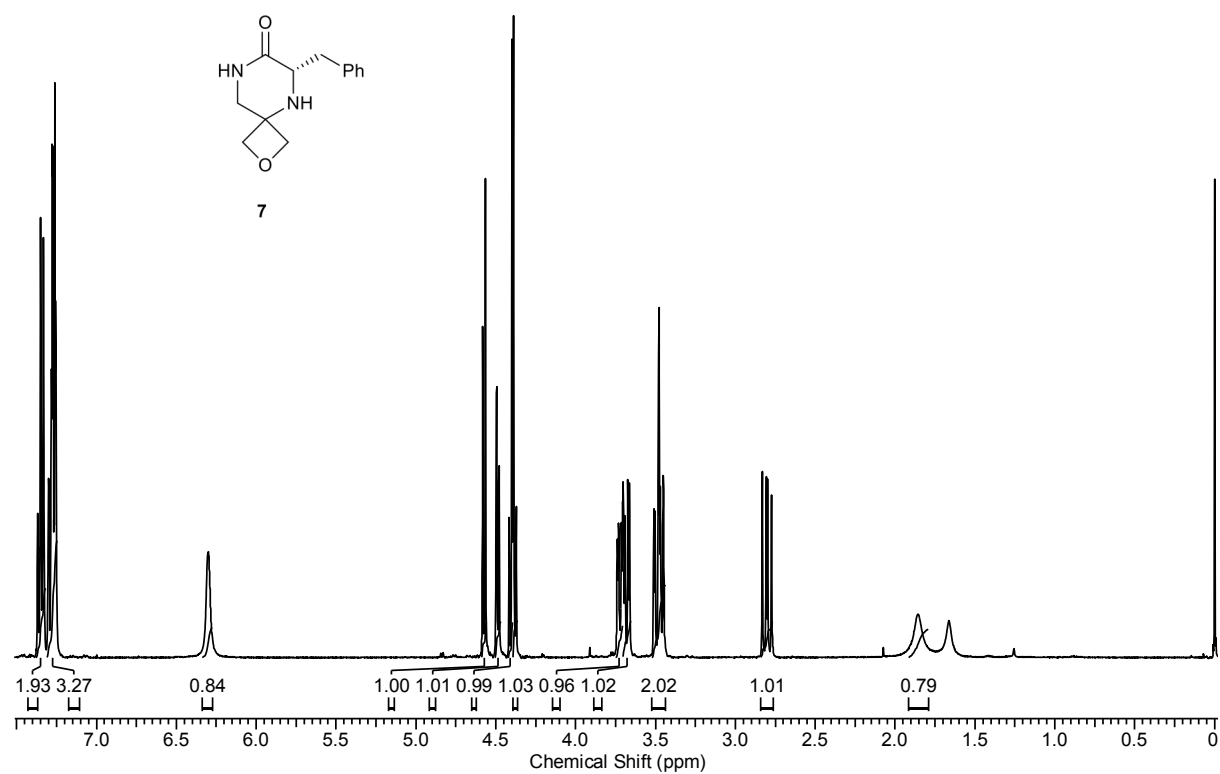**<sup>13</sup>C NMR**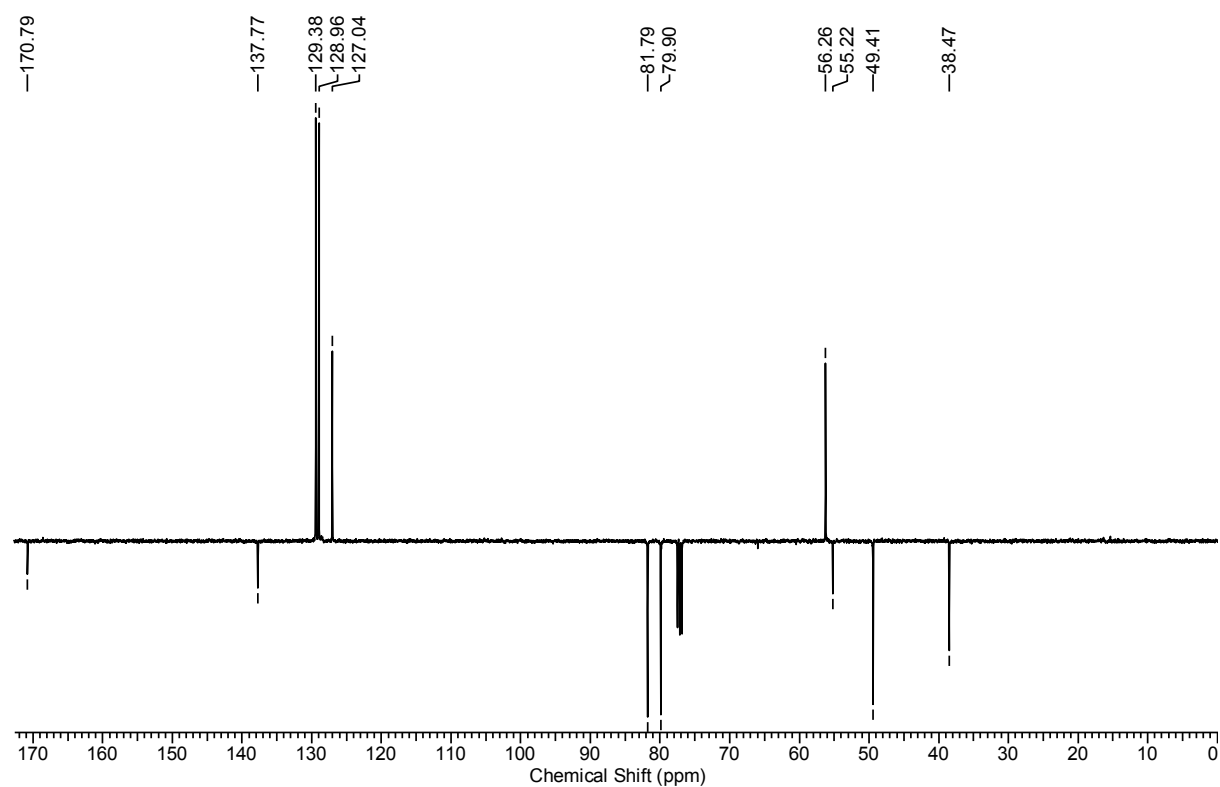

## Chiral HPLC analysis of 4a

(HPLC OD-H, 95 : 5 hexane : *i*PrOH, flow rate = 0.30  $\mu$ L/min,  $\lambda$  = 254 nm)

Mixture of (*R*)-4a and (*S*)-4a

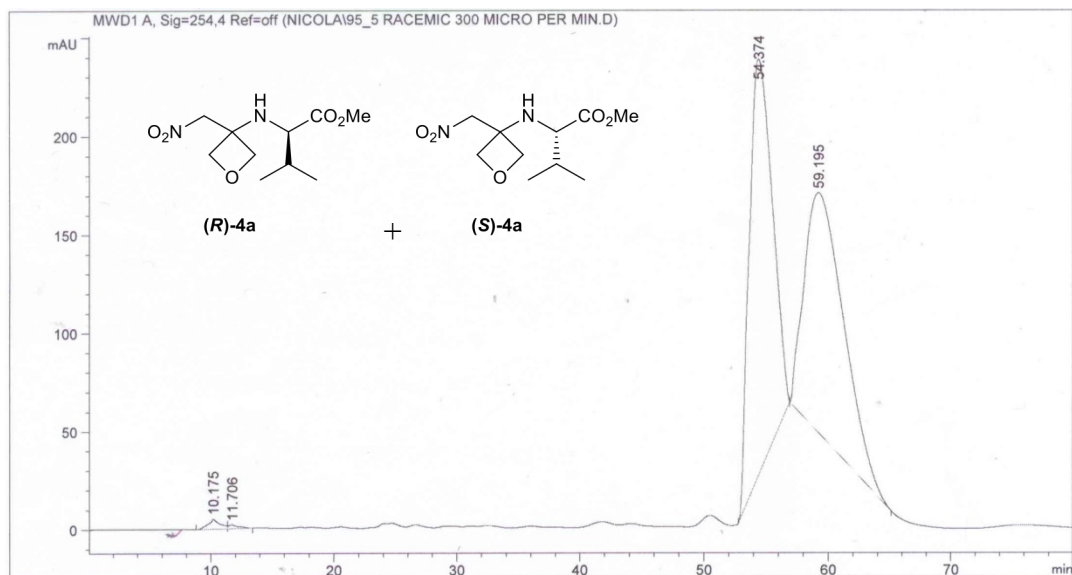

| Peak # | RetTime [min] | Type | Width [min] | Area [mAU*s] | Height [mAU] | Area %  |
|--------|---------------|------|-------------|--------------|--------------|---------|
| 1      | 10.175        | BV   | 0.7869      | 345.16547    | 5.22686      | 0.6290  |
| 2      | 11.706        | VB   | 0.6662      | 108.72919    | 1.91983      | 0.1981  |
| 3      | 54.374        | BB   | 1.4997      | 2.72239e4    | 212.27832    | 49.6070 |
| 4      | 59.195        | BB   | 2.6066      | 2.72013e4    | 121.93700    | 49.5659 |

**(S)-4a**

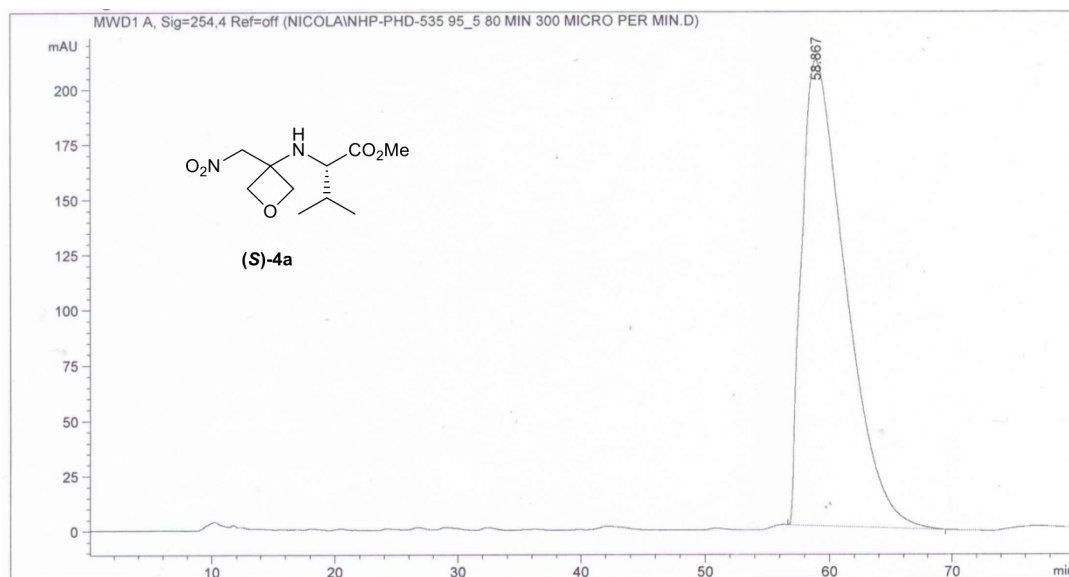

| Peak # | RetTime [min] | Type | Width [min] | Area [mAU*s] | Height [mAU] | Area %   |
|--------|---------------|------|-------------|--------------|--------------|----------|
| 1      | 58.867        | BB   | 2.8600      | 5.15828e4    | 210.71313    | 100.0000 |

**(R)-4a**

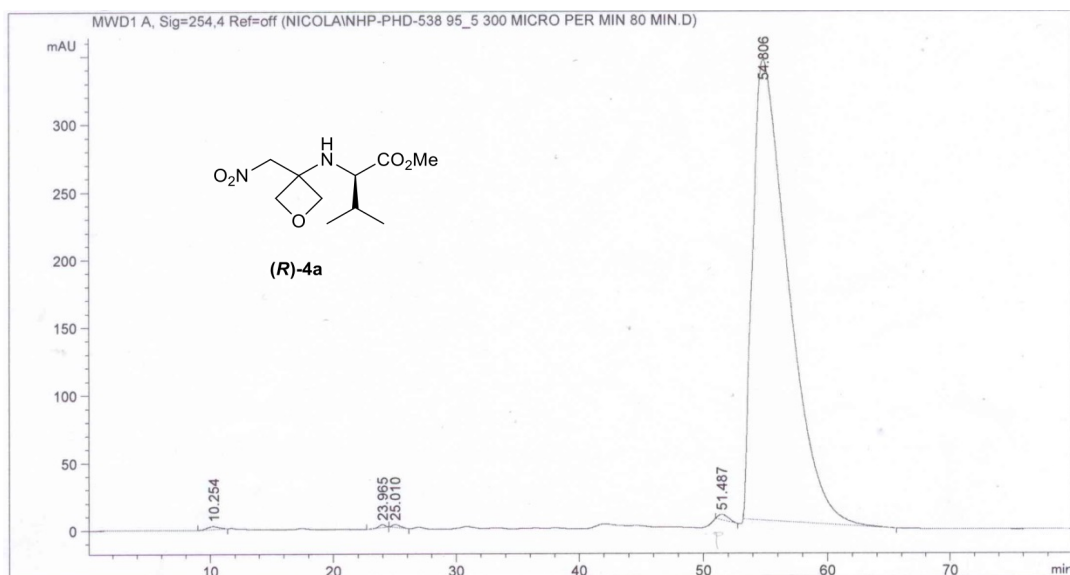

| Peak # | RetTime [min] | Type | Width [min] | Area [mAU*s] | Height [mAU] | Area %  |
|--------|---------------|------|-------------|--------------|--------------|---------|
| 1      | 10.254        | BB   | 0.7384      | 152.92067    | 2.42422      | 0.2249  |
| 2      | 23.965        | BB   | 0.4219      | 76.26684     | 2.12404      | 0.1122  |
| 3      | 25.010        | BB   | 0.5285      | 88.67345     | 1.96676      | 0.1304  |
| 4      | 51.487        | BB   | 0.6835      | 232.87225    | 3.99550      | 0.3425  |
| 5      | 54.806        | BB   | 2.3168      | 6.74385e4    | 340.03842    | 99.1900 |

## X-Ray Crystallography

**1c** [CCDC 996044]:

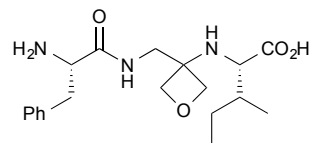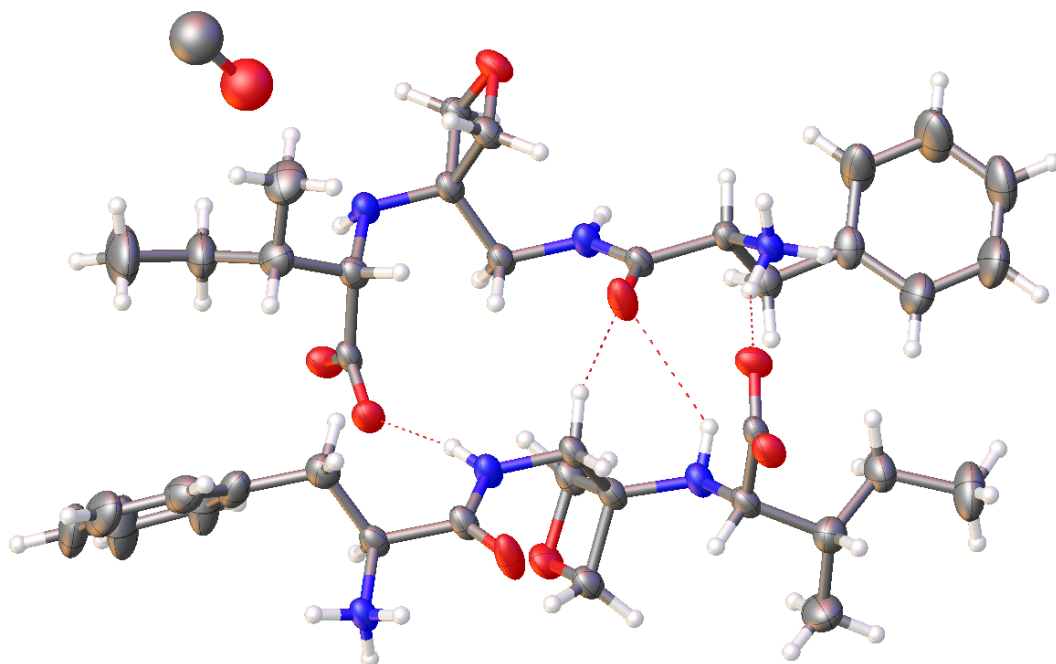

Contents of the unit cell of **1c** showing the two crystallographically independent molecules and a partially occupied molecule of methanol.

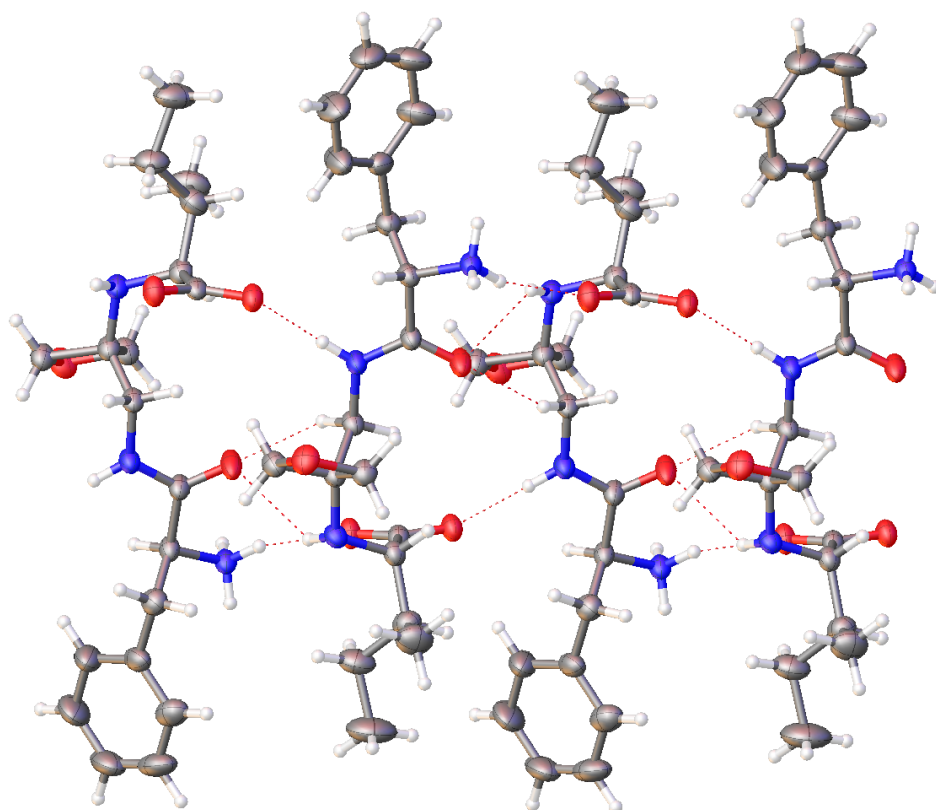

Part of the infinite hydrogen bonded anti-parallel sheet in the solid state of **1c** that travels along the b axis of the cell (closest Miller plane 1 0 -2).



**1e** [CCDC 996043]:

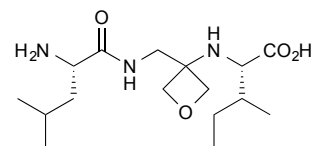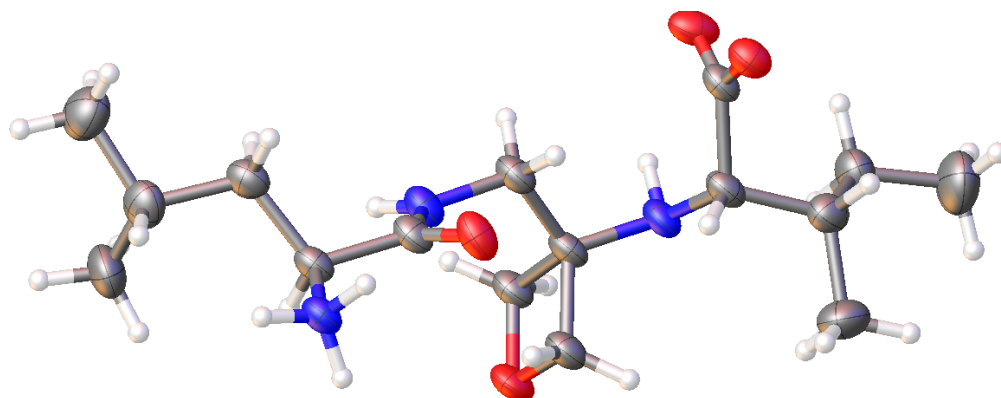

Solid state structure of one of the crystallographically independent molecules in the unit cell of **1e**

## Molecular Dynamics Simulations

### Computational Methods

#### *CHARMM-compatible forcefield parameters for the 3-amino oxetane residue*

The CHARMM forcefield is one of the most widely used forcefields for molecular dynamics (MD) simulations of peptides, proteins and other biomolecules;<sup>[5]</sup> however there are no parameters for oxetanes within the CHARMM forcefield. Therefore to enable MD simulations of oxetane isosteres it was necessary to develop a set of CHARMM-compatible forcefield parameters for this class of molecules. Following the general guidelines for the CHARMM forcefield we adopted a ‘divide-and-conquer’ approach by developing parameters for small molecular fragments (see Figure A) that capture the essential chemistry of the modified peptide bond (carbonyl to oxetane substitution and rotation about the  $\psi$  and  $\omega$  dihedral angles). Non-bonded Lennard-Jones parameters for the C, O and H atoms comprising the oxetane ring (hereafter denoted atom types COX, OOX and HOX respectively and depicted in Figure B) were taken from existing CHARMM parameters for tetrahydrofuran (THF).<sup>[6]</sup> For completeness, the Lennard-Jones parameters are reported in Table A.

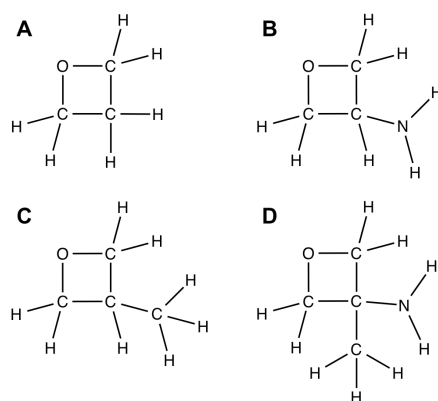

**Figure A** Molecular fragments used in the parameterisation of oxetane isosteres. (A) Oxetane molecule and oxetane molecules with (B) NH<sub>2</sub> group, (C) CH<sub>3</sub> group and (D) both NH<sub>2</sub> and CH<sub>3</sub> groups, used to develop bonded parameters.

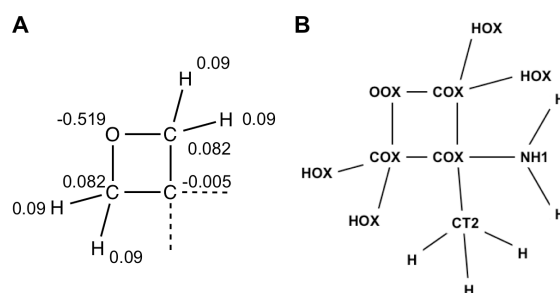

**Figure B** (A) Atomic partial charges on oxetane atoms; (B) non-bonded atom types referred to in this work.

**Table A** Non-bonded Lennard-Jones parameters for the oxetane atoms.

| Atom type | $\sigma$ /nm | $\epsilon$ /kJ mol <sup>-1</sup> |
|-----------|--------------|----------------------------------|
| OOX       | 0.2940       | 0.41840                          |
| COX       | 0.3599       | 0.25104                          |
| HOX       | 0.2316       | 0.14644                          |

Atomic partial charges were determined using the Force Field Toolkit (ffTK) Plugin<sup>[7]</sup> to the Visual Molecular Dynamics (VMD) software package.<sup>[8]</sup> Quantum mechanical (QM) calculations were performed using the Gaussian 03 program.<sup>[9]</sup> In brief, partial charges were chosen to reproduce the QM interaction energy with a TIP3P<sup>[10]</sup> water molecule. First, an oxetane molecule was energy minimized at the MP2/6-31G\* level of theory. Putative hydrogen bond acceptor or donor interaction sites were identified and a water molecule automatically constructed in an ideal orientation for hydrogen bonding with each interaction site. For each oxetane-water complex, separate calculations were carried out at the HF/6-31G\* level of theory to optimize the distance of the water molecule to the target atom and the rotation angle of the water about the line connecting them. The interaction energy was determined from the difference between the energy of the complex and the independent energies of an oxetane and a water molecule. Consistent with the CHARMM procedure to better approximate the bulk-phase, QM-optimised distances were shifted by -0.2 Å and the interaction energies scaled by 1.16. The ffTK then iteratively fit atomic partial charges to the QM target data so that the molecular mechanics (MM) interaction energy reproduced the QM interaction energy, subject to the constraints that hydrogen atoms have a default charge of

+0.09 and the molecule is charge neutral. The final set of partial charges for an oxetane-substituted amino acid derivative is given in Figure B.

Target data for fitting bond stretching, angle bending and dihedral angle rotation parameters were obtained from QM calculations at the MP2/6-31G\* level of theory. In each case the relevant molecular fragment (see Figure A and Tables B-D) was selected and a relaxed potential energy surface scan was carried out where the particular bond, angle or dihedral of interest was constrained in increments about the energy minimum (increments of 0.1 Å for bonds, 1° for angles and 5° for dihedrals involving rings) or about a 360° rotation (increments of 10° for all other dihedrals). Equilibrium values and force constants for bond stretching (see Table B for parameters) and angle bending (see Table C for parameters) were obtained by fitting a harmonic function to the resulting potential energy surface. For dihedral angle rotation, the Lennard-Jones and electrostatic contribution needed to be taken into account. For each QM structure the CHARMM MM energy (excluding the dihedral to parameterize) was calculated and the periodic function  $V_{\text{dih}} = k_{\phi} (1 + \cos(n\phi - \gamma))$  fitted to the difference between the QM and MM energies, where  $V_{\text{dih}}$  is the potential energy associated with rotation about the dihedral angle  $\phi$ ,  $k_{\phi}$  defines the barrier height,  $n$  is the multiplicity, and  $\gamma$  is the phase shift (see Table D for parameters). All other peptide parameters were taken from the standard CHARMM all atom forcefield.<sup>[11,12]</sup>

**Table B** Bond stretching parameters for the bond energy between atoms  $i$  and  $j$ , where  $b_{\text{eq}}$  is the equilibrium bond length and  $k_b$  is the force constant.

| Fragment | Atom type $i$ | Atom type $j$    | $b_{\text{eq}}/\text{nm}$ | $k_b/\text{kJ mol}^{-1}\text{nm}^{-2}$ |
|----------|---------------|------------------|---------------------------|----------------------------------------|
| A        | COX           | COX              | 0.1549                    | 135381                                 |
| A        | COX           | OOX              | 0.1469                    | 136963                                 |
| C        | COX           | CT2 <sup>‡</sup> | 0.1530                    | 148818                                 |
| A        | COX           | HOX              | 1.1132                    | 160449                                 |
| B        | COX           | NH1 <sup>‡</sup> | 1.4726                    | 137639                                 |

<sup>‡</sup>CT2 and NH1 are the CHARMM atom types for the C<sub>α</sub> atom in Gly and the amide N in a peptide bond respectively.

**Table C** Angle bending parameters for the angle bending energy involving atoms  $i, j$  and  $k$ , where  $\theta_{eq}$  is the equilibrium bond angle and  $k_\theta$  is the force constant.

| Fragment | Atom type $i$    | Atom type $j$    | Atom type $k$    | $\theta_{eq}$ /degrees | $k_\theta$ /kJ mol <sup>-1</sup> rad <sup>-2</sup> |
|----------|------------------|------------------|------------------|------------------------|----------------------------------------------------|
| A        | COX              | COX              | COX              | 84.19                  | 973.79                                             |
| A        | COX              | OOX              | COX              | 90.08                  | 809.31                                             |
| A        | OOX              | COX              | COX              | 91.53                  | 941.49                                             |
| A        | HOX              | COX              | HOX              | 109.71                 | 224.71                                             |
| A        | OOX              | COX              | HOX              | 111.43                 | 289.97                                             |
| A        | COX              | COX              | HOX              | 113.21                 | 206.13                                             |
| B        | COX              | COX              | NH1              | 115.79                 | 251.75                                             |
| B        | COX              | NH1 <sup>‡</sup> | H                | 109.60                 | 209.73                                             |
| C        | COX              | COX              | CT2 <sup>‡</sup> | 114.34                 | 278.80                                             |
| C        | COX              | CT2 <sup>‡</sup> | H                | 111.17                 | 237.36                                             |
| D        | CT2 <sup>‡</sup> | COX              | NH1 <sup>‡</sup> | 109.97                 | 424.06                                             |

**Table D** Dihedral angle parameters for dihedral angle defined by the atoms  $i, j, k$  and  $l$ .

| Fragment | Atom type $i$ | Atom type $j$ | Atom type $k$ | Atom type $l$ | $\gamma$ | $k_\phi$ | $n$ |
|----------|---------------|---------------|---------------|---------------|----------|----------|-----|
| B        | COX           | COX           | NH1           | H             | 0.00     | 0.1798   | 3   |
| D        | CT2           | COX           | NH1           | H             | 180.00   | 0.1408   | 3   |
| D        | NH1           | COX           | CT2           | H             | 0.00     | 0.8140   | 3   |
| C        | COX           | COX           | CT2           | H             | 0.00     | 0.5631   | 3   |
| C        | OOX           | COX           | COX           | CT2           | 0.00     | 11,5379  | 1   |
| B        | OOX           | COX           | COX           | NH1           | 0.00     | 14.2987  | 1   |
| C        | HOX           | COX           | COX           | CT2           | 180.00   | 5.88593  | 1   |
| B        | HOX           | COX           | COX           | NH1           | 180.00   | 3.88079  | 1   |
| A        | COX           | COX           | COX           | OOX           | 180.00   | 13.0708  | 3   |
| A        | COX           | COX           | COX           | HOX           | 0.00     | 5.5891   | 3   |
| A        | COX           | COX           | OOX           | COX           | 180.00   | 12.7528  | 3   |
| A        | HOX           | COX           | OOX           | COX           | 180.00   | 0.5188   | 3   |

### *Initial configurations of the peptides*

Starting coordinates of the peptides were generated using the protein builder tool in the Tinker software package,<sup>[13]</sup> assuming a linear conformation ( $\phi$ ,  $\psi$  and  $\omega$  backbone dihedral angles were set to  $180^\circ$ ) and zwitterionic ends. The C=O to oxetane substitution was made by replacing the O atom with energy minimized oxetane coordinates from the QM calculation described above. Input topology files for Gromacs<sup>[14]</sup> were generated using the Gromacs pdb2gmx tool after first modifying the residue database to include oxetane-substituted residues. Each structure was solvated with 2100 TIP3P<sup>[10]</sup> water molecules.

### *Simulation parameters*

Energy minimization and MD simulations were carried out using the Gromacs simulation package version 4.5.5.<sup>[14]</sup> Each solvated peptide was subjected to 50000 steps of steepest descents energy minimization. This was followed by 50000 steps of simulation at 300 K in the *NVT* ensemble and 50000 steps of simulation at 300 K and 1 bar in the *NPT* ensemble to equilibrate the temperature and density of the system respectively. To overcome the issue of kinetic trapping in local minima and enhance the sampling of conformational space, each peptide was then simulated for 100 ns at 500 K in the *NVT* ensemble. Cluster analysis (see below) was performed on the resultant trajectory to group peptide conformations according to their structural similarity. The central structure of the top ten most populated clusters (which accounted for >99.9% of the total population) was then used as the starting configuration for ten independent 100 ns simulations of each peptide at 300K and 1 bar in the *NPT* ensemble. Accordingly, each peptide was simulated for a total simulation time of 1  $\mu$ s.

In all MD simulations, all bonds were constrained using the LINCS algorithm<sup>[15]</sup> and a simulation timestep of 2 fs was used. Periodic boundary conditions were applied in all directions. Lennard-Jones interactions were cutoff at 1.0 nm. Electrostatic interactions were handled using the particle mesh Ewald approach with a real-space cutoff of 1.0 nm. The temperature was controlled using velocity rescaling with a stochastic term<sup>[16]</sup> with a time constant of 0.1 ps and the pressure was isotropically maintained at 1 bar using the Berenden barostat<sup>[17]</sup> with time constant 1.0 ps and compressibility  $4.5 \times 10^{-5} \text{ bar}^{-1}$ . Atomic coordinates were saved every 10 ps for analysis.

### *Assessment of convergence and sampling*

Cluster analysis was used to identify distinct peptide conformations from the trajectories. We used the algorithm proposed by Daura et al.<sup>[18]</sup> whereby the root mean square deviation (RMSD) of atom positions between all pairs of structures is determined. For each structure the number of other structures for which the RMSD of the backbone atoms was  $\leq 0.07$  nm (neighbour conformations) was calculated. The structure with the highest number of neighbours was taken as the centre of a cluster and together with its neighbours formed the first cluster. All these structures were eliminated from the pool of structures and the process repeated to find new clusters until the pool of structures was empty. In this way, each structure belonged to only one cluster. To assess whether the sampling was adequate in our simulations, we calculated the number of clusters as a function of the total simulation time (i.e. the number of clusters in the first independent 100 ns trajectory was determined, then the first and second trajectories were joined together and the number of clusters determined, then the first, second and third trajectories were joined together and so on until all ten trajectories were included). As shown in Figure C, no new structures for **8** are found after the first two 100 ns simulations, whereas eight 100 ns simulations are needed before no new structures are found for the oxetane-modified peptide, **1e**. The relative population of each cluster with increasing simulation time is shown in Figure D. It can be seen that the cluster populations have converged with the last 200 ns of simulation essentially contributing no new structural information.

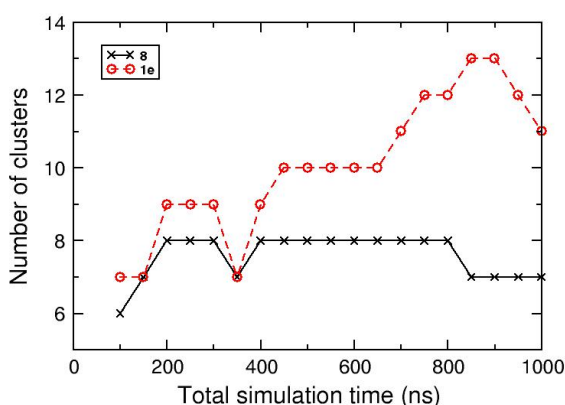

**Figure C** Number of clusters as the 10 independent 100 ns simulations are added to the trajectory.



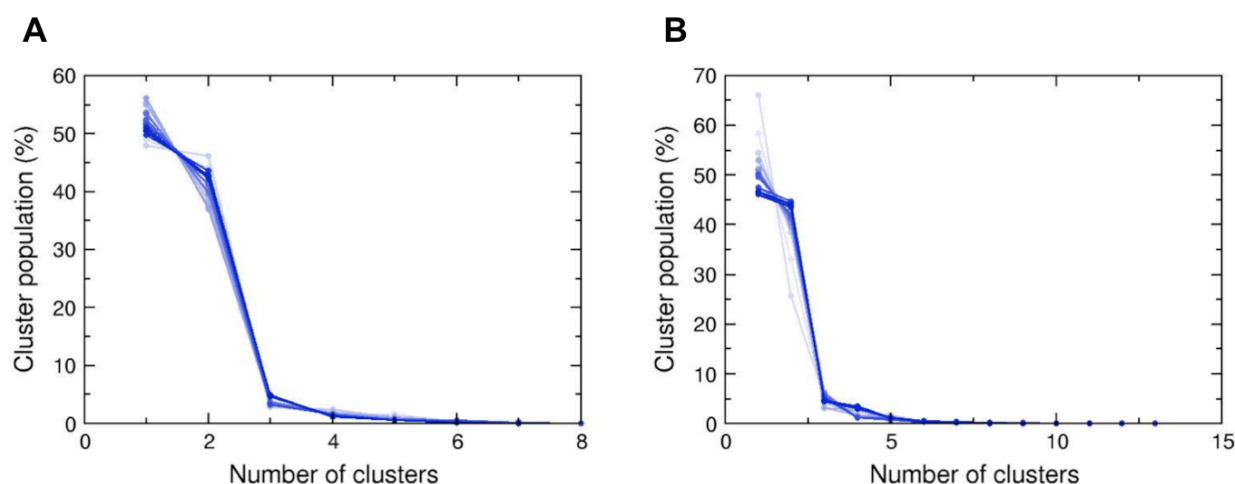

**Figure D** Population (% of total) of each cluster as the 10 independent 100 ns simulations are added to the trajectory for (A) natural peptide **8** and (B) the oxetane derivative **1e**. Data are overlaid going from the lightest shade of blue 0-50 ns to the darkest shade of blue 0-1  $\mu$ s.

## Simulation Results

Analysis of the MD simulations was carried out on the entire 1  $\mu$ s trajectory. The distribution of the distance between the C-terminal C atom and the N-terminal N atom of each peptide is presented in Figure E where folded conformations are characterised by a C-N distance of between 3 and 5 Å. The distribution for **1e** has two distinct peaks which indicates that **1e** interchanges between folded and extended conformations. On the other hand, the distribution for **8** is dominated by a single broader peak centred around 8 Å which indicates that the peptide spends most of the time in an extended conformation with the folded conformation occurring only rarely. The distribution of the distance between the Leu and Ile  $C_{\alpha}$  atoms is shown in Figure F. Hydrogen bonds were identified using geometric criteria whereby a hydrogen bond is said to exist if the donor---acceptor distance  $< 2.0$  Å and the angle donor-hydrogen---acceptor  $\leq 20^{\circ}$ . The percentage occupancy of all intra-peptide hydrogen bonds is given in Table E. Hydrogen-bonding is negligible in the natural peptide, **8**. In the oxetane-containing tripeptide **1e** limited (~12-15% occupancy) hydrogen bonding is identified between the C and N termini (this may simply be a consequence of the electrostatic

interaction between the termini) and the C terminus and the N atom of the modified Gly residue, which may further stabilise the folded conformation.

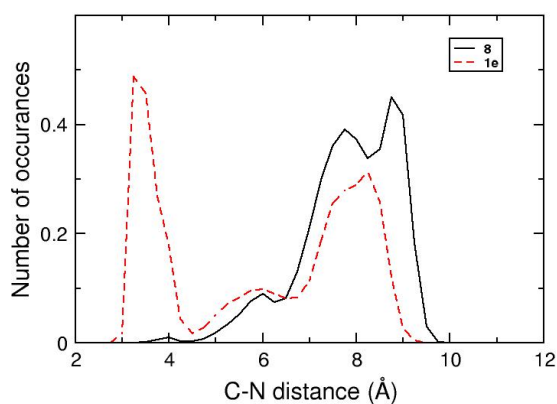

**Figure E** Normalised distribution of the distance between the C-terminal C atom and the N-terminal N atom obtained from MD simulations in solution.

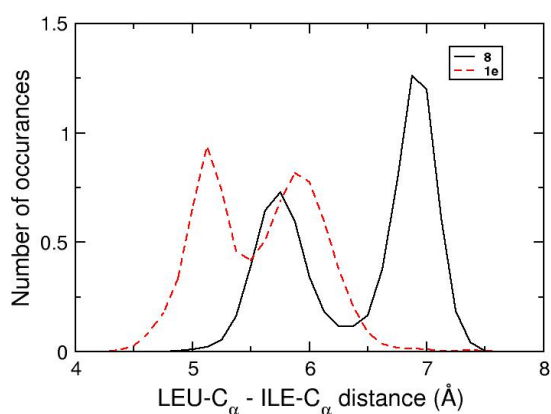

**Figure F** Normalised distribution of the distance between the Leu and Ile  $C_{\alpha}$  atoms obtained from MD simulations in solution.

**Table E** Occupancy of intra-peptide hydrogen-bonds for **8** and **1e** in solution.

| Peptide   | Donor Atom | Acceptor Atom | % Occupancy |
|-----------|------------|---------------|-------------|
| <b>8</b>  | Leu N      | Ile O         | 0.23        |
|           | Leu N      | Ile O         | 15.24       |
| <b>1e</b> | Gly N      | Ile O         | 12.70       |
|           | Ile N      | Leu O         | 0.13        |

## References

1. V. Singh, S. Kanojiya, and S. Batra, *Tetrahedron*, 2006, **62**, 10100.
2. Y. J. Pu, R. K. Vaid, S. K. Boini, R. W. Towsley, C. W. Doecke, and D. Mitchell, *Org. Process Res. Dev.*, 2009, **13**, 310.
3. I. Ntai and B. O. Bachmann, *Bioorg. Med. Chem. Lett.*, 2008, **18**, 3068.
4. Q. Zhu and Y. Lu, *Org. Lett.*, 2009, **11**, 1721.
5. X. Zhu, P. E. M. Lopes and A. D. MacKerell, *WIREs Comput. Mol. Sci.*, 2012, **2**, 167.
6. I. Vorobyov, V. M. Anisimov, S. Greene, R. M. Venable, A. Moser, R. W. Pastor and A. D. MacKerell, *J. Chem. Theory Comput.*, 2007, **3**, 1120.
7. C. G. Mayne, J. Saam, K. Schulten, E. Tajkhorshid and J. C. Gumbart, *J. Comput. Chem.*, 2013, **34**, 2757.
8. W. Humphrey, A. Dalke and K. Schulten, *J. Mol. Graphics*, 1996, **14**, 33.
9. M. J. Frisch, G. W. Trucks, H. B. Schlegel, G. E. Scuseria, M. A. Robb et al., Gaussian, Inc., Wallingford, CT, 2004.
10. W. L. Jorgensen, J. Chandrasekhar, J. D. Madura, R. W. Impey and M. L. Klein, *J. Chem. Phys.*, 1983, **79**, 926.
11. B. R. Brooks, R. E. Bruccoleri, B. D. Olafson, D. J. States, S. Swaminathan and M. Karplus, *J. Comput. Chem.*, 1983, **4**, 187.
12. A. D. MacKerell, B. Brooks, C. L. Brooks, L. Milsson, B. Roux, Y. Won and M. Karplus, *Encyclopedia of Computational Chemistry*, John Wiley & Sons, 1988.
13. J. W. Ponder, P. Ren, R. V. Pappu, R. K. Hart, M. E. Hodgson, D. P. Cistola, C. E. Kundrot and F. M. Richards, Washington University School of Medicine, 6.2 edn., 2013.
14. S. Pronk, S. Páll, R. Schulz, P. Larsson, P. Bjelkmar, R. Apostolov, M. R. Shirts, J. C. Smith, P. M. Kasson, D. van der Spoel, B. Hess and E. Lindahl, *Bioinformatics*, 2013, **29**, 845.
15. B. Hess, *J. Chem. Theory Comput.*, 2008, **4**, 116-122.
16. G. Bussi, D. Donadio and M. Parrinello, *J. Chem. Phys.*, 2007, **126**, 014101.
17. H. J. C. Berendsen, J. P. M. Postma, W. F. van Gunsteren, A. DiNola and J. R. Haak, *J. Chem. Phys.*, 1984, **81**, 3684.
18. X. Daura, K. Gademann, B. Jaun, D. Seebach, W. F. van Gunsteren and A. E. Mark, *Angew. Chem.-Int. Ed.*, 1999, **38**, 236.
